# Supplementary material for: Risk of developing multimorbidity across all ages in an historical cohort study: differences by sex and ethnicity
Source: PubMed Central journal article supplement — BMJ Open. 2015 Feb 3;5(2):e006413. doi: 10.1136/bmjopen-2014-006413 (PMC4322195; doi:10.1136/bmjopen-2014-006413), 2015-02-03
Supplement: bmjopen-2014-006413.draft_revisions.pdf [file bmjopen-2014-006413.draft_revisions.pdf]

# BMJ Open

## Risk of developing multimorbidity across all ages in a cohort study: differences by sex and ethnicity

|                                 |                                                                                                                                                                                                                                                                                                                                                                                                                                                                                                                                                                                                                                                                                                                                                                                                                          |
|---------------------------------|--------------------------------------------------------------------------------------------------------------------------------------------------------------------------------------------------------------------------------------------------------------------------------------------------------------------------------------------------------------------------------------------------------------------------------------------------------------------------------------------------------------------------------------------------------------------------------------------------------------------------------------------------------------------------------------------------------------------------------------------------------------------------------------------------------------------------|
| Journal:                        | <i>BMJ Open</i>                                                                                                                                                                                                                                                                                                                                                                                                                                                                                                                                                                                                                                                                                                                                                                                                          |
| Manuscript ID:                  | bmjopen-2014-006413                                                                                                                                                                                                                                                                                                                                                                                                                                                                                                                                                                                                                                                                                                                                                                                                      |
| Article Type:                   | Research                                                                                                                                                                                                                                                                                                                                                                                                                                                                                                                                                                                                                                                                                                                                                                                                                 |
| Date Submitted by the Author:   | 19-Aug-2014                                                                                                                                                                                                                                                                                                                                                                                                                                                                                                                                                                                                                                                                                                                                                                                                              |
| Complete List of Authors:       | St Sauver, Jennifer; Mayo Clinic, Health Sciences Research<br>Boyd, Cynthia; Johns Hopkins University, Geriatric Medicine and Gerontology<br>Grossardt, Brandon; Mayo Clinic, Biomedical Statistics and Informatics<br>Bobo, William; Mayo Clinic, Department of Psychiatry<br>Finney Rutten, Lila; Mayo Clinic, The Robert D. and Patricia E. Kern Center for the Science of Health Care Delivery<br>Roger, Verinique; Mayo Clinic, The Robert D. and Patricia E. Kern Center for the Science of Health Care Delivery<br>Ebbert, John; Mayo Clinic, The Robert D. and Patricia E. Kern Center for the Science of Health Care Delivery<br>Therneau, Terry; Mayo Clinic, Biomedical Statistics and Informatics<br>Yawn, Barbara; Olmsted Medical Center, Research<br>Rocca, Walter; Mayo Clinic, Health Sciences Research |
| <b>Primary Subject Heading</b>: | Epidemiology                                                                                                                                                                                                                                                                                                                                                                                                                                                                                                                                                                                                                                                                                                                                                                                                             |
| Secondary Subject Heading:      | Cardiovascular medicine, Health services research, Public health                                                                                                                                                                                                                                                                                                                                                                                                                                                                                                                                                                                                                                                                                                                                                         |
| Keywords:                       | EPIDEMIOLOGY, Cardiac Epidemiology < CARDIOLOGY, GENERAL MEDICINE (see Internal Medicine), GERIATRIC MEDICINE, PREVENTIVE MEDICINE, PRIMARY CARE                                                                                                                                                                                                                                                                                                                                                                                                                                                                                                                                                                                                                                                                         |
|                                 |                                                                                                                                                                                                                                                                                                                                                                                                                                                                                                                                                                                                                                                                                                                                                                                                                          |

SCHOLARONE™  
Manuscripts

# Risk of developing multimorbidity across all ages in a cohort study: differences by sex and ethnicity

Jennifer L. St. Sauver *associate professor*<sup>1 2</sup>, Cynthia M. Boyd *associate professor*<sup>3</sup>,  
Brandon R. Grossardt *biostatistician*<sup>4</sup>, William V. Bobo *assistant professor*<sup>5</sup>, Lila J.  
Finney Rutten *associate professor*<sup>1 2</sup>, Véronique L. Roger *professor*<sup>1 2 6</sup>, Jon O. Ebbert  
*professor*<sup>2</sup>, Terry M. Therneau *professor*<sup>4</sup>, Barbara P. Yawn *director of research*<sup>1 7</sup>,  
Walter A. Rocca *professor*<sup>1 8</sup>

**Author Affiliations:** <sup>1</sup> Divisions of Epidemiology, College of Medicine, Mayo Clinic, 200 First Street SW, Rochester, MN 55905, USA; <sup>2</sup> The Robert D. and Patricia E. Kern Center for the Science of Health Care Delivery, College of Medicine, Mayo Clinic, 200 First Street SW, Rochester, MN 55905, USA; <sup>3</sup> Division of Geriatric Medicine and Gerontology, School of Medicine, Johns Hopkins University, 600 North Wolfe Street, Baltimore, MD 21287, USA; <sup>4</sup> Division of Biomedical Statistics and Informatics, Department of Health Sciences Research, College of Medicine, Mayo Clinic, 200 First Street SW, Rochester, MN 55905, USA; <sup>5</sup> Department of Psychiatry and Psychology, College of Medicine, Mayo Clinic, 200 First Street SW, Rochester, MN 55905, USA; <sup>6</sup> Division of Cardiovascular Diseases, Department of Internal Medicine, College of Medicine, Mayo Clinic, 200 First Street SW, Rochester, MN 55905, USA; <sup>7</sup> Department of Research, Olmsted Medical Center, 210 Ninth Street SE, Rochester, MN 55904, USA; <sup>8</sup> Department of Neurology, College of Medicine, Mayo Clinic, 200 First Street SW, Rochester, MN 55905, USA

1  
2  
3 **Word Count:** (4,192/approximately 4,000)  
4

5 **Abstract:** (289/300)  
6

7  
8 **Strengths and limitations of this study:** 223  
9

10 **References:** 37  
11

12 **Figures/Tables:** (5/5)  
13

14 **Supplementary Tables:** 3  
15  
16  
17  
18  
19  
20

21 **Corresponding Author:** Walter A. Rocca, MD, MPH, Division of Epidemiology,  
22 Department of Health Sciences Research, Mayo Clinic, 200 First Street SW, Rochester,  
23 MN 55905 (telephone: 507-284-3568; fax: 507-284-1516; e-mail: [rocca@mayo.edu](mailto:rocca@mayo.edu)).  
24  
25  
26  
27  
28  
29  
30  
31

32 **Extra material supplied by the author:** Supplementary tables A-C  
33  
34  
35  
36  
37  
38  
39  
40  
41  
42  
43  
44  
45  
46  
47  
48  
49  
50  
51  
52  
53  
54  
55  
56  
57  
58  
59  
60

## ABSTRACT

**Objective:** To study the incidence of de novo multimorbidity across all ages in a geographically defined population with an emphasis on sex and ethnic differences.

**Design:** Historical cohort study.

**Setting:** All persons residing in Olmsted County, Minnesota, USA on January 1, 2000 who had not refused permission for their records to be used for research (n = 123,716).

**Participants:** We used the Rochester Epidemiology Project medical records-linkage system to identify all of the county residents. We identified and removed from the cohort all persons who had developed multimorbidity before January 1, 2000 (baseline date), and we followed the cohort over 14 years (January 1, 2000 through December 31, 2013).

**Main outcome measures:** Incident multimorbidity was defined as the development of the second of 2 conditions (dyads) from among the 20 chronic conditions selected by the United States Department of Health and Human Services. We also studied the incidence of the third of 3 conditions (triads) from among the 20 chronic conditions.

**Results:** The incidence of multimorbidity increased steeply with older age; however, the number of people with incident multimorbidity was substantially greater in those younger than 65 years compared to people age 65 years or older (28,378 vs. 6,214). The

1  
2  
3 overall risk was similar in men and women; however, the combinations of conditions  
4  
5 (dyads and triads) differed extensively by age and by sex. Compared to Whites, the  
6  
7 incidence of multimorbidity was higher in Blacks and lower in Asians.  
8  
9

10  
11  
12 **Conclusions:** The risk of developing de novo multimorbidity increases steeply with  
13  
14 older age, varies by ethnicity, and is similar in men and women overall. However, the  
15  
16 combinations of conditions vary extensively by age and sex. These data represent an  
17  
18 important first step toward identifying the causes and the consequences of  
19  
20 multimorbidity.  
21  
22  
23  
24  
25  
26  
27  
28  
29  
30  
31  
32  
33  
34  
35  
36  
37  
38  
39  
40  
41  
42  
43  
44  
45  
46  
47  
48  
49  
50  
51  
52  
53  
54  
55  
56  
57  
58  
59  
60

## ARTICLE SUMMARY: Strengths and limitations of this study

- This is one of the first studies worldwide focusing on the incidence of multimorbidity rather than on the prevalence of multimorbidity. Prevalence reflects both the effect of incidence and of survival after the onset of multimorbidity. We used a simple definition of incident multimorbidity that can be replicated in other populations.
- This study covered an entire geographically defined population, and used a unique records-linkage system. Therefore, the study used 19 years of data accumulation in medical records. None of the data were derived from self-report or interviews.
- Studies of multimorbidity require the definition of the number of conditions considered, of the time window of occurrence, and of the source of data (medical records vs. interview). We used the 20 conditions recommended by the US Department of Health and Human Services. These 20 conditions represent a first consensus list; however, not all of the conditions have the same impact on the complexity of care or on the quality of life of patients.
- Potential weaknesses of this study include the uncertain validity of diagnostic codes, the possible incompleteness of information due to in or out migration, and the inability to generalize our findings to other populations with different demographic or social characteristics.
- Replication of this study in other populations in the United States and worldwide will allow for useful comparisons.

## INTRODUCTION

The demographic expansion of the elderly population and the improvements in survival of people affected by chronic conditions have caused a dramatic rise in the number of people living with multimorbidity ( $\geq 2$  chronic conditions). In the United States, the prevalence of multimorbidity among Medicare recipients increases from 62% at age 65 - 74 years to 82% at ages 85 years and older.<sup>1</sup> The monetary costs associated with managing patients with multiple chronic conditions are overwhelming.<sup>2-4</sup> In addition, fragmented health care in patients with multimorbidity causes a particularly high risk for complications and a lower quality of life.<sup>5,6</sup>

Several studies have described the prevalence of multimorbidity in a wide range of populations.<sup>1,7-12</sup> Additional studies have focused on how to manage patients with multiple chronic conditions.<sup>13,14</sup> However, in 2010 the United States Department of Health and Human Services (US-DHHS) highlighted the critical need to identify groups of individuals at higher risk of developing multimorbidity (first appearance of multimorbidity). Such studies of incident multimorbidity are essential to identify patterns of disease accumulation, and to identify the populations at high risk of developing multimorbidity. For example, multimorbidity is highly prevalent in the elderly; however, many of the processes that lead to multimorbidity begin at much earlier ages. Therefore, data on the ages at which multimorbidity begins and on the patterns of accumulation of conditions over time are urgently needed to develop focused interventions to prevent multimorbidities and their adverse health outcomes.<sup>15</sup>

Unfortunately, there are currently no population-based data on the incidence of multimorbidity in the United States across all ages, even though multimorbidity is a high

1  
2  
3 public health priority for the nation.<sup>15</sup> The Rochester Epidemiology Project (REP)  
4  
5 medical records-linkage system captures long-term medical information on a stable  
6  
7 population, and is therefore uniquely positioned to study the incidence of multimorbidity.  
8  
9 In a previous paper, we described in detail the patterns of prevalent multimorbidity in  
10  
11 this population.<sup>16</sup> In this study, we further leveraged this data resource to examine the  
12  
13 incidence of multimorbidity across all ages, separately in men and women, and in three  
14  
15 ethnic groups.<sup>17</sup>  
16  
17  
18  
19  
20  
21

## 22 **METHODS**

### 23 **Study population**

24  
25  
26  
27  
28 The REP has tracked and linked health care information for the population of Olmsted  
29  
30 County, MN, since 1966.<sup>17-19</sup> The vast majority of medical care in this community is  
31  
32 currently provided by a few health care institutions: Olmsted Medical Center and its  
33  
34 affiliated hospital, Mayo Clinic and its two affiliated hospitals, the Rochester Family  
35  
36 Medicine Clinic, and a few smaller care facilities. The health care records from these  
37  
38 institutions are linked together through the REP records-linkage system.<sup>17-19</sup> Persons  
39  
40 are considered residents of Olmsted County at the time of each health care visit based  
41  
42 on their address. Over the years, this address information has been accumulated and  
43  
44 is used to define who resided in Olmsted County at any given point in time since 1966  
45  
46 (REP Census). The population counts obtained by the REP Census are similar to those  
47  
48 obtained by the US Census, indicating that virtually the entire population of the county is  
49  
50 captured by the system.<sup>18-20</sup> We used the REP Census to identify all individuals who  
51  
52 resided in Olmsted County on January 1, 2000 (baseline date); however, we included  
53  
54  
55  
56  
57  
58  
59  
60



1  
2  
3 only individuals who had not refused permission to use their medical records for  
4  
5 research (Minnesota research authorization).<sup>18,21,22</sup>  
6  
7  
8  
9

## 10 **Definition of incident multimorbidity**

11  
12 We focused on 20 selected chronic conditions recommended by the US-DHHS for  
13  
14 studying multimorbidity.<sup>23,24</sup> The list of the 20 conditions and the corresponding ICD-9  
15  
16 codes used in this study are provided in Supplementary Table A.<sup>23,24,23,24</sup> We first  
17  
18 identified all ICD-9 codes associated with these 20 chronic conditions that occurred in  
19  
20 the population between January 1, 1995 and December 31, 1999 (5 years before the  
21  
22 baseline date, January 1, 2000). Persons who did not have any ICD-9 code for a given  
23  
24 condition were assumed to not have the condition of interest. By contrast, residents  
25  
26 were defined as having a chronic condition if they had at least two ICD-9 codes for that  
27  
28 condition separated by more than 30 days, and the incidence date was assigned at the  
29  
30 time they received a second diagnostic code.  
31  
32  
33  
34  
35  
36

37  
38 Persons who had 2 or more of the 20 conditions at baseline were considered to  
39  
40 have prevalent multimorbidity and were therefore excluded from incidence analyses of 2  
41  
42 chronic conditions (dyads). Similarly, persons who had 3 or more of the 20 conditions  
43  
44 at baseline were excluded from incidence analyses of 3 chronic conditions (triads). All  
45  
46 persons in this fixed population cohort were followed historically through the REP  
47  
48 records-linkage system for approximately 14 years to study the emergence of new  
49  
50 conditions.  
51  
52  
53  
54  
55

## 56 **Statistical Analyses**

1  
2  
3 All persons in the cohort were followed from January 1, 2000 through the last contact  
4 with the records-linkage system (the earliest of death date, last medical visit date, or  
5  
6 December 31, 2013). The incidence of each of the 20 chronic conditions was  
7  
8 calculated among persons free of that condition at baseline. Persons contributed  
9  
10 person-years to the denominator for the incidence of 2 conditions (development of a  
11  
12 second condition in a dyad) only during the time when they had 0 or 1 chronic  
13  
14 conditions, whereas persons contributed person-years to the denominator for the  
15  
16 incidence of 3 chronic conditions (development of a third condition in a triad) only when  
17  
18 they had 0, 1, or 2 chronic conditions. Although the majority of people accumulated  
19  
20 conditions one-at-a-time, some subjects jumped from 0 to 2 conditions, or from 1 to 3,  
21  
22 or even from 0 to 3 conditions. For example, a person previously considered free of all  
23  
24 of the 20 conditions who was diagnosed with hyperlipidemia, hypertension, and  
25  
26 depression during one visit was counted both as an incident dyad and as an incident  
27  
28 triad on the same date.  
29  
30  
31  
32  
33  
34  
35

36 Incidence rates were reported separately by age (using seven age strata or  
37  
38 splitting the entire population in 0-64 and  $\geq 65$  years), sex, and ethnicity, and were  
39  
40 directly standardized by age and sex to the total US 2010 Decennial Census after  
41  
42 removing projected prevalence (see Supplementary Table B). Because the study  
43  
44 covered the target population completely, and no sampling was involved, confidence  
45  
46 intervals were not included in the tables.<sup>25 26</sup> Ethnicity data were not available for 9,176  
47  
48 people (7.4% of the cohort). These individuals were included in the overall and age-  
49  
50 and sex-specific analyses, but not in the ethnicity-specific analyses.  
51  
52  
53  
54  
55  
56  
57  
58  
59  
60

1  
2  
3  
4  
5  
6  
7  
8  
9  
10  
11  
12  
13  
14  
15  
16  
17  
18  
19  
20  
21  
22  
23  
24  
25  
26  
27  
28  
29  
30  
31  
32  
33  
34  
35  
36  
37  
38  
39  
40  
41  
42  
43  
44  
45  
46  
47  
48  
49  
50  
51  
52  
53  
54  
55  
56  
57  
58  
59  
60

Although the 20 conditions proposed by the US-DHHS represent a national consensus,<sup>15</sup> some of the conditions may have a different prognostic impact than others. For example, hyperlipidemia and hypertension often occur together and tend to remain asymptomatic. Therefore, we performed a set of sensitivity analyses combining hyperlipidemia and hypertension as a single chronic condition. The date of incidence for the single chronic condition of hyperlipidemia and/or hypertension was defined as the date the person first met criteria for either of these conditions.

## RESULTS

### Description of the Olmsted County population

The REP Census identified 129,311 Olmsted County, MN residents on January 1, 2000 compared with 124,277 individuals counted by the 2000 US Census (104.1%); 123,716 persons provided Minnesota research authorization for medical record research (95.7%) and were included in our analyses. A total of 17,655 people (14.3%) had 2 or more conditions at the baseline date and 9,368 (7.6%) had 3 or more conditions (prevalent multimorbidity). Overall, we observed a total of 1,334,906 person-years of follow-up, but the length of follow-up varied by age group. For example, median follow-up was 13.1 years in persons aged 0 to 19 years at baseline, 12.3 years in persons aged 70 to 79 years at baseline, and 4.9 years in persons aged 80 years or older at baseline.

Figure 1 and Supplementary Table C report the incidence of each of the 20 chronic conditions considered separately by age and sex. The incidence of most of the chronic conditions increased steeply with older age. However, the incidence of asthma, substance abuse disorders, hepatitis, autism spectrum disorder, and infection with

1  
2  
3 human immunodeficiency virus was higher in the younger population compared to those  
4  
5 older than 60 years. The incidence of depression increased from ages 0-19 to 20-39  
6  
7 years, declined from 40-49 to 60-69 years, and increased sharply again thereafter. The  
8  
9 incidence of most conditions was higher in men compared to women of the same age;  
10  
11 however, women had a higher incidence of depression, arthritis, asthma, and  
12  
13 osteoporosis. The incidence curves in men and women crossed at age 50-59 years for  
14  
15 cancer and at age 60-69 years for chronic obstructive pulmonary disease (Figure 1).  
16  
17  
18  
19  
20  
21

## 22 **Incidence of multimorbidity by age, sex, and ethnicity**

23  
24  
25 Figure 2 shows the age-specific incidence rates of multimorbidity in men and women  
26  
27 separately (panels A and C), and in three ethnic groups (panels B and D). Both the  
28  
29 incidence of 2 chronic conditions and the incidence of 3 chronic conditions increased  
30  
31 steeply with older age (Table 1, Table 2, and Figure 2). For example, the incidence of 2  
32  
33 chronic conditions in men was 6.5/1,000 person-years in persons who were ages 0-19  
34  
35 years, and 260.0/1,000 in persons who were  $\geq 80$  years. The overall incidence of 2  
36  
37 chronic conditions was slightly higher in women compared to men (overall standardized  
38  
39 incidence rates 38.8 vs. 35.5/1,000 person-years; Table 1). The incidence of 2 chronic  
40  
41 conditions was higher in Blacks compared to Whites, but lower in Asians compared to  
42  
43 Whites (standardized incidence rates; Table 1 and Figure 2). We observed similar  
44  
45 patterns for the development of 3 chronic conditions (Table 2 and Figure 2). The overall  
46  
47 incidence of 3 conditions was similar in men and women (standardized incidence rates  
48  
49 25.5/1,000 person-years in men vs. 26.6/1,000 person-years in women); however, it  
50  
51 was higher in Blacks and lower in Asians, compared to Whites (Figure 2).  
52  
53  
54  
55  
56  
57  
58  
59  
60

1  
2  
3 In the set of sensitivity analyses in which we combined hyperlipidemia and  
4 hypertension as a single condition, we observed a slight decrease in the incidence of 2  
5 chronic conditions and of 3 chronic conditions compared with the primary analyses.  
6  
7 The overall incidence rate of 2 conditions decreased from 35.0 to 34.0/1,000 person-  
8 years in men and from 40.3 to 40.0/1,000 person-years in women. The incidence rate  
9 of 3 conditions decreased from 24.7 to 22.5/1,000 person-years in men and from 28.5 to  
10 27.0/1,000 person-years in women (incidence rates non-standardized; data not shown  
11 in the Tables). For both 2 and 3 conditions, the decrease in incidence was more  
12 sizeable in men than in women.  
13  
14  
15  
16  
17  
18  
19  
20  
21  
22  
23

## 24 25 26 27 **Incidence of dyads and triads**

28  
29  
30 Table 3 shows the incidence of the most common dyads or triads of chronic conditions  
31 in seven age strata and for men and women separately. The incidence of dyads and  
32 triads varied extensively with age. For example, the most common incident dyad in  
33 persons 0-19 years was depression and asthma (1.8/1,000 person-years in boys or  
34 men and 2.9/1,000 person-years in girls or women). By comparison, the most common  
35 dyad in persons  $\geq 80$  years was hypertension and cancer in men (18.9/1,000 person-  
36 years) and hypertension and arthritis in women (27.7/1,000 person-years). Similarly,  
37 the most common incident triad of conditions in persons aged 0-19 years was  
38 depression, asthma, and substance abuse disorders in both sexes. By comparison, the  
39 most common incident triads in persons  $\geq 80$  years were hypertension, cancer, and  
40 arrhythmia in men and hyperlipidemia, hypertension, and arthritis in women.  
41  
42  
43  
44  
45  
46  
47  
48  
49  
50  
51  
52  
53  
54  
55  
56  
57  
58  
59  
60

1  
2  
3 The incidence of dyads and triads also varied by sex. In some instances, the  
4 composition of the dyads or triads was the same for men and women, but the  
5 magnitude of the incidence rate was different. In other instances, the magnitude of the  
6 incidence rate was similar in men and women, but the composition of the dyads and  
7 triads varied by sex. For example, the most common incident dyad in persons aged 60-  
8 69 years was hyperlipidemia and hypertension in both sexes, but the incidence rate was  
9 higher in men compared to women (23.4/1,000 person-years vs. 18.8/1,000 person-  
10 years). By contrast, the incidence rates of the most common triads in persons aged 60-  
11 69 years were similar in men and women (11.6/1,000 vs. 10.3/1,000 person-years);  
12 however, they included different conditions (Table 3).  
13  
14  
15  
16  
17  
18  
19  
20  
21  
22  
23  
24  
25  
26  
27  
28

## 29 **DISCUSSION**

### 30 **Statement of the principal findings**

31  
32 The burden of multimorbidity in the United States is high and is increasing with an aging  
33 population and with improvements in survival. We leveraged a unique longitudinal data  
34 resource covering an entire stable and geographically defined population to examine  
35 the incidence of multimorbidity across all ages. The incidence of 2 chronic conditions  
36 and the incidence of 3 chronic conditions increased steeply with older age, and the  
37 overall risk was similar in men and women. However, the number of people who  
38 developed multimorbidity before age 65 was more than four times greater than the  
39 number of people who developed multimorbidity after age 65. The incidence of  
40 multimorbidity was highest in Blacks, and lowest in Asians. Finally, the combinations of  
41 conditions in incident dyads and triads differed extensively by age and by sex. These  
42  
43  
44  
45  
46  
47  
48  
49  
50  
51  
52  
53  
54  
55  
56  
57  
58  
59  
60

1  
2  
3 results have important implications for identifying individuals at higher risk of developing  
4 multimorbidity at different ages. These data are also a first step toward understanding  
5 the causes and the consequences of multimorbidity.  
6  
7  
8  
9

## 10 11 12 **Strengths and weaknesses**

13  
14  
15  
16 A unique strength of our study was the ability to measure the incidence of multimorbidity  
17 documented in medical records across seven age groups and for an entire,  
18 geographically defined population. We used historical data both to exclude individuals  
19 with prevalent multimorbidity at baseline and to follow individuals over a long period of  
20 time to accurately document the development of incident multimorbidity. In total, our  
21 findings reflect 19 years of data accumulation (5 years before and 14 years after the  
22 baseline date).  
23  
24  
25  
26  
27  
28  
29  
30  
31

32  
33 Unfortunately, there is no standard definition of multimorbidity. Previous studies  
34 have included a wide range of chronic conditions and a wide range of time frames. We  
35 defined multimorbidity using the 20 conditions selected by US-DHHS which were  
36 chosen because they “meet the definition for chronicity, are prevalent [common], and  
37 are potentially amenable to public health or clinical interventions or both.”<sup>23</sup> However,  
38 this definition provides equal weight to each of the 20 conditions without considering the  
39 impact of combinations of specific conditions on the quality of life of patients, the  
40 complexity of their joint management, and the severity of their long-term outcomes.  
41  
42  
43  
44  
45  
46  
47  
48  
49  
50

51  
52 Some of the dyads and triads derived by the combination of the 20 conditions  
53 selected by the US-DHHS may have a much stronger impact on the complexity of  
54 clinical management than others.<sup>27</sup> Therefore, some dyads or triads may be  
55  
56  
57  
58  
59  
60

1  
2  
3 particularly costly for the health system, harder for the patient to manage by  
4  
5 themselves, less amenable to a single disease approach to care (e.g., telemonitoring for  
6  
7 heart failure), and may have a stronger effect on functionality, severity of symptoms,  
8  
9 and risk of death. In addition, social (e.g., inadequate insurance, low education) and  
10  
11 behavioral factors (e.g., poor diet) not reflected in the list of 20 US-DHHS conditions  
12  
13 may be as important, or more important, than the 20 conditions in determining the  
14  
15 complexity of clinical management and long-term outcomes.<sup>27</sup>  
16  
17

18  
19  
20 For example, because hyperlipidemia and hypertension are typically  
21  
22 asymptomatic, and are often diagnosed as the result of routine screening, their  
23  
24 combination is likely to have a much lower impact on the life of the patient than the  
25  
26 combination of schizophrenia and heart failure. However, both combinations are  
27  
28 considered multimorbidity by the US-DHHS definition. Our sensitivity analyses highlight  
29  
30 this problem. As expected, when hyperlipidemia and hypertension were considered as  
31  
32 a single condition, the overall incidence of multimorbidity decreased. The decreases  
33  
34 were relatively small but were more sizeable in men than in women. These findings  
35  
36 emphasize the importance of reaching consensus on the list of conditions to be used to  
37  
38 define multimorbidity. However, it is difficult to assess the utility of the 20 conditions  
39  
40 included in the US-DHHS list without also understanding how different combinations of  
41  
42 these conditions impact long term outcomes. Therefore, we plan to continue this initial  
43  
44 incidence study with further analyses to assess which combinations of conditions have  
45  
46 the greatest impact on adverse outcomes, including patient quality of life and complexity  
47  
48 of clinical management.<sup>27</sup>  
49  
50  
51  
52  
53  
54  
55  
56  
57  
58  
59  
60



1  
2  
3 We defined incident multimorbidity as the date on which a person met the criteria  
4 for a second condition or for a third condition. We used an approach similar to that  
5 used in the definition for the onset of metabolic syndrome (reaching three of five  
6 components of the syndrome).<sup>28,29</sup> This simple operational definition of incident  
7 multimorbidity should be easy to replicate, and should facilitate future comparisons with  
8 other populations.  
9

10  
11 Potential weaknesses of our study include the inability to validate the ICD-9  
12 codes. It was not possible to confirm all diagnoses for the entire study population, and  
13 some ICD-9 codes may have been assigned in error (e.g., “rule out” diagnostic codes).  
14 To reduce the likelihood of a single ICD-9 code error, we required two or more  
15 diagnosis codes separated by more than 30 days for a person to be defined as having a  
16 condition.<sup>30</sup> However, if a person received a valid code and was lost to follow-up or  
17 died rapidly after diagnosis, we may have underestimated the incidence of some of the  
18 conditions. In addition, we used diagnosis date as a proxy for the true date of onset of  
19 the condition.  
20  
21

22  
23 Some individuals may have moved into Olmsted County after having been  
24 diagnosed with one or more chronic conditions elsewhere. If those persons continued  
25 to receive care within the REP for a number of years, we captured their chronic  
26 condition at the time of subsequent health care visits. However, we did not know the  
27 true date of onset for the condition, and the sequence of accumulation of conditions  
28 could be distorted. Because the population of Olmsted County is stable, particularly  
29 among persons who are 40 years of age or older,<sup>19</sup> we do not expect a major distortion  
30 of multimorbidity incidence rates due to migration.  
31  
32  
33  
34  
35  
36  
37  
38  
39  
40  
41  
42  
43  
44  
45  
46  
47  
48  
49  
50  
51  
52  
53  
54  
55  
56  
57  
58  
59  
60

1  
2  
3  
4 Finally, our study focused on a single geographically defined US population, and  
5  
6 the incidence of multimorbidity may differ in other populations. However, the  
7  
8 demographic and socioeconomic characteristics of our population are similar to those of  
9  
10 the upper Midwest of the United States,<sup>20</sup> and the prevalence of multimorbidity in  
11  
12 persons 65 years of age or older was similar in our population compared with the entire  
13  
14 US Medicare population.<sup>16</sup> Replication of this study in other populations in the United  
15  
16 States and worldwide will allow for useful comparisons.  
17  
18  
19  
20  
21

## 22 **Comparison with other studies**

23  
24  
25 A number of studies have described the prevalence of multimorbidity in various  
26  
27 populations;<sup>1,7-12</sup> however, few studies have described the incidence of multimorbidity,  
28  
29 and no incidence studies are available for the US. In 1998, Van den Akker and  
30  
31 colleagues estimated the one year incidence of multimorbidity in patients from a  
32  
33 network of family practices in the Netherlands.<sup>31</sup> Incident multimorbidity was defined as  
34  
35 the new development of at least 2 of 335 diagnostic categories within a one year period.  
36  
37 Overall, 7.9% of their population developed one new disease and 1.3% developed two  
38  
39 or more new diseases in one year. The proportion of people who developed two or  
40  
41 more new conditions increased with older age, but did not differ substantially by sex. It  
42  
43 is difficult to compare our results directly to the Dutch findings because of  
44  
45 methodological differences (e.g., number of conditions considered and time frame), and  
46  
47 because it is not clear whether some of the participants in the Dutch study already had  
48  
49 one or more conditions at baseline. However, we observed similar patterns of  
50  
51  
52  
53  
54  
55  
56  
57  
58  
59  
60

1  
2  
3 increasing incidence with older age, and limited differences between men and women in  
4 overall incidence.  
5  
6

7  
8 More recently, Melis and colleagues assessed the incidence of multimorbidity in  
9 Swedish people aged 75 years or older at baseline who participated in a longitudinal  
10 cohort study.<sup>32</sup> Incident multimorbidity was defined as the development of at least 2 of  
11 39 chronic conditions during three years of follow-up. Participants with none of the 39  
12 chronic conditions at baseline had a multimorbidity incidence rate of 12.6 per 100  
13 person-years, and patients with one of the 39 conditions at baseline had an incidence  
14 rate of 32.9 per 100 person-years. Although we examined fewer conditions than the  
15 Swedish group (20 vs. 39), and the ascertainment of incident conditions was different  
16 (medical records data vs. survey methods), our incidence rates of multimorbidity in  
17 subjects aged 75 years or older were similar (19.1 per 100 person-years in people with  
18 no conditions at baseline and 38.9 per 100 person-years in persons with one condition  
19 at baseline; both sexes combined; data not shown).  
20  
21  
22  
23  
24  
25  
26  
27  
28  
29  
30  
31  
32  
33  
34  
35  
36  
37  
38  
39  
40

## 41 **Meaning of the study**

42 To understand the importance of these findings, we draw an analogy with the difference  
43 between prevalence and incidence in epidemiologic studies considering one disease at  
44 a time.<sup>33,34</sup> Incidence is the direct measure of the risk of people to develop a given  
45 disease, whereas prevalence is the percent of people affected by the same disease at  
46 one point in time, and reflects both the effect of incidence and the effect of survival after  
47 the onset of the disease.<sup>33,34</sup> Similarly, the prevalence of multimorbidity gives us a  
48 static picture of the population; however, prevalence may be misleading when studying  
49  
50  
51  
52  
53  
54  
55  
56  
57  
58  
59  
60

1  
2  
3 the mechanisms of multimorbidity. For example, a higher prevalence of multimorbidity  
4  
5 in women than in men may be due to a higher risk of women developing multimorbidity,  
6  
7 or to a longer survival of women affected by multimorbidity.<sup>16</sup> By contrast, a higher  
8  
9 incidence of multimorbidity in women compared to men points directly to a difference in  
10  
11 risk (assuming that access to care is comparable in the sexes).  
12  
13

14  
15 Prior studies of the prevalence of multimorbidity have shown a dramatic increase  
16  
17 in the number of people living with 2 or more chronic conditions at older ages.<sup>1,7-11</sup>  
18  
19 However, the high prevalence of multimorbidity in the older population implies that  
20  
21 relatively few older individuals remain at risk of developing multimorbidity. Overall,  
22  
23 among persons aged  $\geq 80$  years at baseline, only 891 out of 3,710 (24.0%) were at risk  
24  
25 of developing 2 chronic conditions (the other 76.0% already had 2 or more of the 20  
26  
27 conditions). Therefore, the persons who reached 80 years of age or older and  
28  
29 remained free of multimorbidity represent an ideal population in which to study  
30  
31 successful aging and resiliency.  
32  
33

34  
35 We also found that the total number of people who developed multimorbidity  
36  
37 before age 65 years was more than 4 times greater than the number of people who  
38  
39 developed multimorbidity at age 65 or older (28,378 vs. 6,214). These data emphasize  
40  
41 the need to target preventive efforts at much younger ages, but represent only a first  
42  
43 step toward future research to identify the social, behavioral, and clinical risk and  
44  
45 protective factors for multimorbidity.  
46  
47  
48

49  
50 We found important differences in the incidence of multimorbidity by ethnicity.  
51  
52 The age standardized incidence rates of multimorbidity were higher in Blacks and lower  
53  
54 in Asians compared to Whites. Our findings are consistent with previous studies that  
55  
56  
57  
58  
59  
60

1  
2  
3 showed a higher prevalence of multimorbidity in Blacks compared to Whites, but a lower  
4 prevalence of multimorbidity in Asians.<sup>8,16,35-37</sup> Our data suggest that some of these  
5 differences in prevalence may be attributed to differences in the incidence of the  
6 conditions among different ethnic groups. However, differential survival may also  
7 contribute to the differences in prevalence, which, in turn, may be influenced by  
8 socioeconomic factors, lifestyle behaviors, social environment, and healthcare access.  
9 Further research is needed to better characterize these disparities and to identify the  
10 causal mechanisms that contribute to different development of chronic conditions and to  
11 different survival.  
12  
13  
14  
15  
16  
17  
18  
19  
20  
21  
22  
23

24 The incidence and the composition of the dyads and triads of conditions varied  
25 extensively across age and sex strata. For example, women 20 years of age or older  
26 were more likely to have depression as a component of their incident multimorbidity  
27 dyads and triads compared to men. Such differences may lead to different long-term  
28 outcomes in men and women. Therefore, these data are useful to understand how  
29 multimorbidity develops, and are an important first step toward future research. In  
30 particular, such incident data are necessary to study the chronological order of  
31 acquisition of multiple chronic conditions in different age, sex, and ethnic strata.  
32 Incidence data are also necessary to determine whether the differential order of  
33 acquisition is associated with a different risk of adverse long-term outcomes such as  
34 hospitalizations, emergency department visits, or death. For example, it is not clear  
35 whether acquiring depression prior to arthritis results in worse long-term outcomes  
36 compared with acquiring arthritis prior to depression. Future studies are also needed to  
37  
38  
39  
40  
41  
42  
43  
44  
45  
46  
47  
48  
49  
50  
51  
52  
53  
54  
55  
56  
57  
58  
59  
60

1  
2  
3 understand how additional chronic conditions accumulate after the development of a  
4  
5 second and third condition.  
6  
7  
8  
9

## 10 **Conclusions and clinical implications**

11  
12  
13 It is important and urgent to understand the causes and the consequences of  
14  
15 multimorbidity to inform efforts to delay and prevent disease onset and to develop  
16  
17 effective strategies for caring for patients with multimorbidity. We studied the incidence  
18  
19 of multimorbidity across all ages, separately in men and women, and in three ethnic  
20  
21 groups in a geographically defined US population. The incidence of multimorbidity  
22  
23 increased dramatically with older age and was higher in Blacks but lower in Asians  
24  
25 compared to Whites. Men and women had a similar overall risk, but the combinations  
26  
27 of conditions within dyads and triads varied extensively by age and by sex. These data  
28  
29 represent an important first step toward identifying specific risk factors for  
30  
31 multimorbidity, understanding how chronic conditions accumulate over time, and toward  
32  
33 identifying individuals at highest risk of adverse outcomes.  
34  
35  
36  
37  
38  
39  
40  
41  
42  
43  
44  
45  
46  
47  
48  
49  
50  
51  
52  
53  
54  
55  
56  
57  
58  
59  
60

**Competing interest declaration:**

All authors have completed the Unified Competing Interest form at [www.icmje.org/coi\\_disclosure.pdf](http://www.icmje.org/coi_disclosure.pdf) (available on request from the corresponding author) and declare that (1) none of the authors have support from any companies for the submitted work; (2) none of the authors have any relationships with any companies that might have an interest in the submitted work in the previous 3 years; (3) their spouses, partners, or children have no financial relationships that may be relevant to the submitted work; and (4) none of the authors have any non-financial interests that may be relevant to the submitted work.

**Contributorship statement:** Dr. St. Sauver had full access to all of the data in the study and takes responsibility for the integrity of the data and the accuracy of the data analysis. She is the guarantor for the study.

*Study concept and design:* St. Sauver, Boyd, Grossardt, Yawn, Rocca.

*Acquisition, analysis, or interpretation of data:* St. Sauver, Grossardt, Rocca.

*Drafting of the manuscript:* St. Sauver, Rocca.

*Critical revision of the manuscript for important intellectual content:* St. Sauver, Boyd, Grossardt, Bobo, Finney Rutten, Roger, Ebbert, Therneau, Yawn, and Rocca.

*Statistical analysis:* Grossardt, Therneau.

*Obtained funding:* Yawn, Rocca.

*Administrative, technical, or material support:* Yawn, Rocca.

1  
2  
3 *Study supervision:* Yawn, Rocca.  
4  
5

6 **Identifiable patients:** No identifiable patients were included.  
7  
8

9  
10 **Ethics approvals:** The study was approved by both the Mayo Clinic (IRB number  
11 PR1945-99-08) and the Olmsted Medical Center (IRB number 016-OMC-11)  
12 Institutional Review Boards. Participants were not required to give informed consent for  
13 the study because they had previously provided a general consent for their medical  
14 records to be used for research (Minnesota Research Authorization).  
15  
16  
17  
18  
19

20  
21  
22 **All sources of funding:** This study was made possible using the resources of the  
23 Rochester Epidemiology Project, which is supported by the National Institute on Aging  
24 of the National Institutes of Health under Award Number R01AG034676. The content is  
25 solely the responsibility of the authors and does not necessarily represent the official  
26 views of the National Institutes of Health. This study was also supported by the Mayo  
27 Clinic Robert D. and Patricia E. Kern Center for the Science of Health Care Delivery  
28 Population Health Research Program. Dr. Boyd was supported by the Paul Beeson  
29 Career Development Award Program (NIA K23 AG032910), the John A. Hartford  
30 Foundation, Atlantic Philanthropies, the Starr Foundation, and an anonymous donor.  
31  
32  
33  
34  
35  
36  
37  
38  
39  
40  
41  
42  
43  
44  
45  
46  
47  
48  
49  
50  
51  
52  
53  
54  
55  
56  
57  
58  
59  
60  
The authors of this report are responsible for its content.

**Role of the Sponsors:** The funders had no role in the design and conduct of the study;  
in the collection, analysis, and interpretation of the data; in the preparation, review, or  
approval of the manuscript; or in the decision to submit the manuscript for publication.

**Independence of researchers:** All authors were independent from any funder or  
company.



1  
2  
3 **Responsibility for the integrity of the data:** All authors, external and internal, had full  
4  
5 access to all of the data (including statistical reports and tables) in the study and can  
6  
7 take responsibility for the integrity of the data and the accuracy of the data analysis.  
8  
9

10  
11 **Transparency declaration:** The lead author (the manuscript's guarantor, Dr. JLS)  
12  
13 affirms that the manuscript is an honest, accurate, and transparent account of the study  
14  
15 being reported; that no important aspects of the study have been omitted; and that any  
16  
17 discrepancies from the study as planned have been explained.  
18  
19

20  
21 **Data sharing:** No additional data available.  
22  
23

24  
25 **Exclusive license:** I *Walter A. Rocca*, The Corresponding Author of this article  
26  
27 contained within the original manuscript which includes any diagrams & photographs  
28  
29 within and any related or stand alone film submitted (the Contribution") has the right to  
30  
31 grant on behalf of all authors and does grant on behalf of all authors, a licence to the  
32  
33 BMJ Publishing Group Ltd and its licencees, to permit this Contribution (if accepted) to  
34  
35 be published in the BMJ and any other BMJ Group products and to exploit all subsidiary  
36  
37 rights, as set out in our licence set out at: [http://www.bmj.com/about-bmj/resources-](http://www.bmj.com/about-bmj/resources-authors/forms-policies-and-checklists/copyright-open-access-and-permission-reuse)  
38  
39 [authors/forms-policies-and-checklists/copyright-open-access-and-permission-reuse.](http://www.bmj.com/about-bmj/resources-authors/forms-policies-and-checklists/copyright-open-access-and-permission-reuse)  
40  
41  
42  
43  
44  
45  
46  
47  
48  
49  
50  
51  
52  
53  
54  
55  
56  
57  
58  
59  
60

## REFERENCES

1. Salive ME. Multimorbidity in Older Adults. *Epidemiol Rev.* 2013;35(1):75-83.
2. Anderson G. Chronic Care: Making the case for ongoing care. 2010; <http://www.rwjf.org/en/research-publications/find-rwjf-research/2010/02/chronic-care.html>. Accessed June 4, 2014.
3. Vogeli C, Shields AE, Lee TA, et al. Multiple chronic conditions: prevalence, health consequences, and implications for quality, care management, and costs. *J Gen Intern Med.* 2007;22 Suppl 3:391-395.
4. Thorpe KE, Ogden LL, Galactionova K. Chronic conditions account for rise in Medicare spending from 1987 to 2006. *Health Aff (Millwood).* 2010;29(4):718-724.
5. Sinnott C, Mc Hugh S, Browne J, Bradley C. GPs' perspectives on the management of patients with multimorbidity: systematic review and synthesis of qualitative research. *BMJ Open.* 2013;3(9):e003610.
6. Boyd CM, Wolff JL, Giovannetti E, et al. Healthcare task difficulty among older adults with multimorbidity. *Med Care.* 2014;52 Suppl 3:S118-125.
7. Ward BW, Schiller JS. Prevalence of multiple chronic conditions among US adults: estimates from the National Health Interview Survey, 2010. *Prev Chronic Dis.* 2013;10:E65.
8. Lochner KA, Cox CS. Prevalence of multiple chronic conditions among Medicare beneficiaries, United States, 2010. *Prev Chronic Dis.* 2013;10:E61.
9. Ashman JJ, Beresovsky V. Multiple chronic conditions among US adults who visited physician offices: data from the National Ambulatory Medical Care Survey, 2009. *Prev Chronic Dis.* 2013;10:E64.

10. Prados-Torres A, Calderon-Larranaga A, Hanco-Saavedra J, Poblador-Plou B, van den Akker M. Multimorbidity patterns: a systematic review. *J Clin Epidemiol.* 2014;67(3):254-266.
11. Barnett K, Mercer SW, Norbury M, Watt G, Wyke S, Guthrie B. Epidemiology of multimorbidity and implications for health care, research, and medical education: a cross-sectional study. *Lancet.* 2012;380(9836):37-43.
12. Weiss CO, Boyd CM, Yu Q, Wolff JL, Leff B. Patterns of prevalent major chronic disease among older adults in the United States. *JAMA.* 2007;298(10):1160-1162.
13. Smith SM, Soubhi H, Fortin M, Hudon C, O'Dowd T. Managing patients with multimorbidity: systematic review of interventions in primary care and community settings. *BMJ.* 2012;345:e5205.
14. Uhlig K, Leff B, Kent D, et al. A framework for crafting clinical practice guidelines that are relevant to the care and management of people with multimorbidity. *J Gen Intern Med.* 2014;29(4):670-679.
15. *U.S. Department of Health and Human Services. Multiple Chronic Conditions - A Strategic Framework: Optimum Health and Quality of Life for Individuals with Multiple Chronic Conditions. Washington, D.C. December 2010.*
16. Rocca WA, Boyd CM, Grossardt BR, et al. The prevalence of multimorbidity in a geographically defined American population: patterns by age, sex, and ethnicity. *Mayo Clin Proc.* 2014 (In Press).
17. Rocca WA, Yawn BP, St Sauver JL, Grossardt BR, Melton LJ, 3rd. History of the Rochester Epidemiology Project: half a century of medical records linkage in a US population. *Mayo Clinic Proc.* 2012;87(12):1202-1213.
18. St Sauver JL, Grossardt BR, Yawn BP, Melton LJ, 3rd, Rocca WA. Use of a medical records linkage system to enumerate a dynamic population over time: the Rochester Epidemiology Project. *Am J Epidemiol.* 2011;173(9):1059-1068.

- 1  
2  
3 19. St Sauver JL, Grossardt BR, Yawn BP, et al. Data resource profile: the Rochester  
4  
5 Epidemiology Project (REP) medical records-linkage system. *Int J Epidemiol.*  
6  
7 2012;41(6):1614-1624.  
8
- 9  
10 20. St Sauver JL, Grossardt BR, Leibson CL, Yawn BP, Melton LJ, 3rd, Rocca WA.  
11  
12 Generalizability of epidemiological findings and public health decisions: an illustration  
13  
14 from the Rochester Epidemiology Project. *Mayo Clin Proc.* 2012;87(2):151-160.  
15
- 16 21. Yawn BP, Yawn RA, Geier GR, Xia Z, Jacobsen SJ. The impact of requiring patient  
17  
18 authorization for use of data in medical records research. *J Fam Pract.* 1998;47(5):361-  
19  
20 365.  
21
- 22 22. Jacobsen SJ, Xia Z, Campion ME, et al. Potential effect of authorization bias on medical  
23  
24 record research. *Mayo Clin Proc.* 1999;74(4):330-338.  
25  
26
- 27 23. Goodman RA, Posner SF, Huang ES, Parekh AK, Koh HK. Defining and measuring  
28  
29 chronic conditions: imperatives for research, policy, program, and practice. *Prev Chronic*  
30  
31 *Dis.* 2013;10:E66.  
32
- 33 24. Cohen JW, Cohen SB, Banthin JS. The medical expenditure panel survey: a national  
34  
35 information resource to support healthcare cost research and inform policy and practice.  
36  
37 *Med Care.* 2009;47(7 Suppl 1):S44-50.  
38  
39
- 40 25. Anderson DW, Mantel N. On epidemiologic surveys. *Am J Epidemiol.* 1983;118(5):613-  
41  
42 619.  
43
- 44 26. Deming WE. Boundaries of Statistical Inference. In: Smith H, Johnson NL, eds. *New*  
45  
46 *Developments in Survey Sampling.* New York: Wiley-Interscience; 1969:652-670.  
47  
48
- 49 27. Grant RW, Ashburner JM, Hong CS, Chang Y, Barry MJ, Atlas SJ. Defining patient  
50  
51 complexity from the primary care physician's perspective: a cohort study. *Ann Intern*  
52  
53 *Med.* 2011;155(12):797-804.  
54  
55  
56  
57  
58  
59  
60

- 1  
2  
3 28. Palaniappan L, Carnethon MR, Wang Y, et al. Predictors of the incident metabolic  
4 syndrome in adults: the Insulin Resistance Atherosclerosis Study. *Diabetes Care*.  
5 2004;27(3):788-793.  
6  
7
- 8  
9 29. Hadaegh F, Hasheminia M, Lotfaliany M, Mohebi R, Azizi F, Tohidi M. Incidence of  
10 metabolic syndrome over 9 years follow-up; the importance of sex differences in the role  
11 of insulin resistance and other risk factors. *PloS One*. 2013;8(9):e76304.  
12  
13
- 14 30. Hebert PL, Geiss LS, Tierney EF, Engelgau MM, Yawn BP, McBean AM. Identifying  
15 persons with diabetes using Medicare claims data. *Am J Med Qual*. 1999;14(6):270-277.  
16  
17
- 18 31. van den Akker M, Buntinx F, Metsemakers JF, Roos S, Knottnerus JA. Multimorbidity in  
19 general practice: prevalence, incidence, and determinants of co-occurring chronic and  
20 recurrent diseases. *J Clin Epidemiol*. 1998;51(5):367-375.  
21  
22
- 23 32. Melis R, Marengoni A, Angleman S, Fratiglioni L. Incidence and predictors of  
24 multimorbidity in the elderly: a population-based longitudinal study. *PloS One*.  
25 2014;9(7):e103120.  
26  
27
- 28 33. Porta MS, International Epidemiological Association. *A Dictionary of Epidemiology*. 5th  
29 ed. Oxford; New York: Oxford University Press; 2008.  
30  
31
- 32 34. Szklo M, Nieto FJ. *Epidemiology: Beyond the Basics*. 2nd ed. Sudbury: Jones and  
33 Bartlett Publishers; 2007.  
34  
35
- 36 35. Steiner CA, Friedman B. Hospital utilization, costs, and mortality for adults with multiple  
37 chronic conditions, Nationwide Inpatient Sample, 2009. *Prev Chronic Dis*. 2013;10:E62.  
38  
39
- 40 36. Machlin SR, Soni A. Health care expenditures for adults with multiple treated chronic  
41 conditions: estimates from the Medical Expenditure Panel Survey, 2009. *Prev Chronic*  
42 *Dis*. 2013;10:E63.  
43  
44
- 45 37. Quinones AR, Liang J, Bennett JM, Xu X, Ye W. How does the trajectory of  
46 multimorbidity vary across Black, White, and Mexican Americans in middle and old age?  
47 *J Gerontol B Psychol Sci Soc Sci*. 2011;66(6):739-749.  
48  
49  
50  
51  
52  
53  
54  
55  
56  
57  
58  
59  
60

**Table 1.** Incidence of the second of two chronic conditions (per 1,000 person-years) in persons living in Olmsted County, MN by age, sex, and ethnicity.

| Ethnicity<br>age (years) | Men     |                  |                        | Women   |                  |                        |
|--------------------------|---------|------------------|------------------------|---------|------------------|------------------------|
|                          | Persons | Person-<br>years | Incidence<br>rate* (n) | Persons | Person-<br>years | Incidence<br>rate* (n) |
| <b>All ethnic groups</b> |         |                  |                        |         |                  |                        |
| 0-19                     | 18,879  | 140,653          | 6.5 (921)              | 18,024  | 134,725          | 8.5 (1,151)            |
| 20-39                    | 27,732  | 151,734          | 17.2 (2,613)           | 28,571  | 158,252          | 25.1 (3,972)           |
| 40-49                    | 16,396  | 82,324           | 43.6 (3,590)           | 16,713  | 85,660           | 45.8 (3,920)           |
| 50-59                    | 11,779  | 52,085           | 85.2 (4,436)           | 12,398  | 55,270           | 84.6 (4,674)           |
| 60-69                    | 5,218   | 19,653           | 139.4 (2,739)          | 5,603   | 21,246           | 135.3 (2,874)          |
| 70-79                    | 1,775   | 5,451            | 209.9 (1,144)          | 2,184   | 6,660            | 202.0 (1,345)          |
| ≥ 80                     | 531     | 1,589            | 260.0 (413)            | 1,016   | 2,887            | 277.1 (800)            |
| 0-64                     | 50,648  | 439,254          | 29.7 (13,059)          | 51,056  | 447,399          | 34.2 (15,319)          |
| ≥ 65                     | 3,794   | 14,236           | 196.5 (2,797)          | 4,636   | 17,300           | 197.5 (3,417)          |
| All ages                 | 52,479  | 453,489          | 35.0 (15,856)          | 53,582  | 464,699          | 40.3 (18,736)          |
| Standardized†            | ---     | ---              | 35.5                   | ---     | ---              | 38.8                   |
| <b>Blacks</b>            |         |                  |                        |         |                  |                        |
| 0-19                     | 877     | 6,411            | 5.5 (35)               | 749     | 5,362            | 6.0 (32)               |
| 20-39                    | 1,099   | 6,178            | 16.5 (102)             | 934     | 5,647            | 23.0 (130)             |
| 40-49                    | 429     | 1,836            | 63.2 (116)             | 324     | 1,392            | 61.8 (86)              |
| 50-59                    | 180     | 683              | 105.3 (72)             | 139     | 513              | 121.0 (62)             |
| 60-69                    | 60      | 223              | 134.8 (30)             | 47      | 150              | 193.2 (29)             |
| 70-79                    | 18      | 71               | 140.1 (10)             | 23      | 60               | 200.4 (12)             |
| ≥ 80                     | 4       | 11               | 274.0 (3)              | 3       | 5                | 580.3 (3)              |
| 0-64                     | 1,848   | 15,240           | 22.0 (335)             | 1,563   | 13,010           | 25.5 (332)             |
| ≥ 65                     | 48      | 173              | 190.8 (33)             | 37      | 118              | 185.7 (22)             |
| All ages                 | 1,873   | 15,413           | 23.9 (368)             | 1,587   | 13,128           | 27.0 (354)             |
| Standardized†            | ---     | ---              | 38.9                   | ---     | ---              | 48.5                   |
| <b>Asians</b>            |         |                  |                        |         |                  |                        |
| 0-19                     | 818     | 6,331            | 3.5 (22)               | 826     | 6,299            | 5.6 (35)               |
| 20-39                    | 1,090   | 6,372            | 15.1 (96)              | 1,168   | 7,167            | 14.6 (105)             |
| 40-49                    | 534     | 2,464            | 39.8 (98)              | 591     | 2,869            | 33.8 (97)              |
| 50-59                    | 339     | 1,588            | 71.8 (114)             | 376     | 1,687            | 79.4 (134)             |
| 60-69                    | 159     | 592              | 120.0 (71)             | 185     | 570              | 161.3 (92)             |
| 70-79                    | 51      | 163              | 140.8 (23)             | 74      | 177              | 271.6 (48)             |
| ≥ 80                     | 21      | 60               | 216.6 (13)             | 40      | 92               | 358.1 (33)             |
| 0-64                     | 1,897   | 17,137           | 21.6 (370)             | 1,997   | 18,399           | 23.3 (429)             |
| ≥ 65                     | 114     | 433              | 154.7 (67)             | 159     | 463              | 248.4 (115)            |
| All ages                 | 1,954   | 17,571           | 24.9 (437)             | 2,105   | 18,862           | 28.8 (544)             |
| Standardized†            | ---     | ---              | 29.5                   | ---     | ---              | 34.9                   |
| <b>Whites</b>            |         |                  |                        |         |                  |                        |
| 0-19                     | 14,956  | 119,686          | 6.8 (818)              | 14,414  | 114,906          | 9.0 (1,032)            |
| 20-39                    | 21,792  | 128,801          | 17.9 (2,303)           | 23,214  | 135,903          | 26.5 (3,599)           |
| 40-49                    | 14,426  | 74,921           | 43.6 (3,269)           | 15,088  | 79,123           | 46.1 (3,646)           |
| 50-59                    | 10,795  | 48,361           | 85.8 (4,149)           | 11,520  | 51,901           | 84.8 (4,399)           |

Table 1. Continued

| Ethnicity<br>age (years) | Men     |                  |                        | Women   |                  |                        |
|--------------------------|---------|------------------|------------------------|---------|------------------|------------------------|
|                          | Persons | Person-<br>years | Incidence<br>rate* (n) | Persons | Person-<br>years | Incidence<br>rate* (n) |
| 60-69                    | 4,823   | 18,362           | 140.4 (2,578)          | 5,221   | 20,075           | 134.7 (2,704)          |
| 70-79                    | 1,653   | 5,090            | 212.6 (1,082)          | 2,030   | 6,301            | 200.9 (1,266)          |
| ≥ 80                     | 497     | 1,495            | 262.8 (393)            | 953     | 2,754            | 274.5 (756)            |
| 0-64                     | 40,703  | 383,410          | 31.2 (11,952)          | 42,149  | 394,566          | 35.9 (14,170)          |
| ≥ 65                     | 3,517   | 13,306           | 198.4 (2,640)          | 4,317   | 16,398           | 197.1 (3,232)          |
| All ages                 | 42,382  | 396,716          | 36.8 (14,592)          | 44,465  | 410,964          | 42.3 (17,402)          |
| Standardized†            | ---     | ---              | 36.0                   | ---     | ---              | 39.4                   |

\* Incidence rates are reported per 1,000 person-years.

† Incidence rates were directly standardized to the total US population from the 2010 US Decennial Census after removing the number of people with prevalent multimorbidity ( $\geq 2$  chronic conditions) as projected from our previous study (see Supplementary Table B).<sup>16</sup>

**Table 2.** Incidence of the third of three chronic conditions (per 1,000 person-years) in persons living in Olmsted County, MN by age, sex, and ethnicity.

| Ethnicity<br>age (years) | Men     |                  |                        | Women   |                  |                        |
|--------------------------|---------|------------------|------------------------|---------|------------------|------------------------|
|                          | Persons | Person-<br>years | Incidence<br>rate* (n) | Persons | Person-<br>years | Incidence<br>rate* (n) |
| <b>All ethnic groups</b> |         |                  |                        |         |                  |                        |
| 0-19                     | 19,029  | 144,025          | 1.3 (186)              | 18,203  | 138,055          | 2.0 (282)              |
| 20-39                    | 28,721  | 162,693          | 6.9 (1,123)            | 30,135  | 177,878          | 10.9 (1,944)           |
| 40-49                    | 17,901  | 95,582           | 22.6 (2,157)           | 18,824  | 103,400          | 24.2 (2,507)           |
| 50-59                    | 14,398  | 69,907           | 52.8 (3,688)           | 15,475  | 76,247           | 51.5 (3,930)           |
| 60-69                    | 7,517   | 31,617           | 99.5 (3,146)           | 8,313   | 35,342           | 96.7 (3,416)           |
| 70-79                    | 3,109   | 10,639           | 169.7 (1,805)          | 3,899   | 13,653           | 156.4 (2,136)          |
| ≥ 80                     | 992     | 3,230            | 218.9 (707)            | 1,970   | 6,414            | 230.6 (1,479)          |
| 0-64                     | 53,073  | 491,536          | 18.0 (8,852)           | 54,280  | 517,164          | 20.2 (10,432)          |
| ≥ 65                     | 5,938   | 26,156           | 151.4 (3,960)          | 7,706   | 33,825           | 155.6 (5,262)          |
| All ages                 | 55,898  | 517,693          | 24.7 (12,812)          | 58,450  | 550,989          | 28.5 (15,694)          |
| Standardized†            | ---     | ---              | 25.5                   | ---     | ---              | 26.6                   |
| <b>Blacks</b>            |         |                  |                        |         |                  |                        |
| 0-19                     | 879     | 6,530            | 1.1 (7)                | 751     | 5,458            | 1.1 (6)                |
| 20-39                    | 1,123   | 6,428            | 8.6 (55)               | 960     | 6,032            | 9.4 (57)               |
| 40-49                    | 460     | 2,126            | 34.8 (74)              | 373     | 1,723            | 41.2 (71)              |
| 50-59                    | 218     | 952              | 69.3 (66)              | 173     | 737              | 69.2 (51)              |
| 60-69                    | 81      | 312              | 96.1 (30)              | 70      | 241              | 132.8 (32)             |
| 70-79                    | 27      | 108              | 129.4 (14)             | 28      | 84               | 191.0 (16)             |
| ≥ 80                     | 5       | 23               | 172.3 (4)              | 5       | 9                | 321.2 (3)              |
| 0-64                     | 1,883   | 16,227           | 13.3 (216)             | 1,602   | 14,101           | 14.5 (205)             |
| ≥ 65                     | 58      | 252              | 135.1 (34)             | 54      | 183              | 169.2 (31)             |
| All ages                 | 1,911   | 16,479           | 15.2 (250)             | 1,633   | 14,284           | 16.5 (236)             |
| Standardized†            | ---     | ---              | 28.2                   | ---     | ---              | 34.8                   |
| <b>Asians</b>            |         |                  |                        |         |                  |                        |
| 0-19                     | 823     | 6,419            | 0.6 (4)                | 832     | 6,442            | 1.6 (10)               |
| 20-39                    | 1,109   | 6,747            | 6.2 (42)               | 1,206   | 7,587            | 4.6 (35)               |
| 40-49                    | 574     | 2,841            | 18.7 (53)              | 651     | 3,327            | 20.7 (69)              |
| 50-59                    | 390     | 1,942            | 44.8 (87)              | 439     | 2,191            | 46.1 (101)             |
| 60-69                    | 203     | 830              | 78.3 (65)              | 254     | 966              | 97.3 (94)              |
| 70-79                    | 80      | 259              | 138.8 (36)             | 110     | 353              | 141.5 (50)             |
| ≥ 80                     | 32      | 84               | 202.0 (17)             | 84      | 228              | 241.2 (55)             |
| 0-64                     | 1,940   | 18,472           | 12.2 (225)             | 2,074   | 20,167           | 12.9 (261)             |
| ≥ 65                     | 165     | 650              | 121.5 (79)             | 258     | 929              | 164.7 (153)            |
| All ages                 | 2,027   | 19,122           | 15.9 (304)             | 2,235   | 21,096           | 19.6 (414)             |
| Standardized†            | ---     | ---              | 21.1                   | ---     | ---              | 23.2                   |
| <b>Whites</b>            |         |                  |                        |         |                  |                        |
| 0-19                     | 15,088  | 122,717          | 1.3 (160)              | 14,576  | 117,885          | 2.2 (259)              |
| 20-39                    | 22,681  | 138,725          | 7.1 (990)              | 24,638  | 154,160          | 11.7 (1,799)           |
| 40-49                    | 15,811  | 87,199           | 22.7 (1,978)           | 17,025  | 95,693           | 24.1 (2,308)           |
| 50-59                    | 13,262  | 65,243           | 53.1 (3,464)           | 14,443  | 71,770           | 51.7 (3,714)           |



Table 2. Continued

| Ethnicity<br>age (years) | Men     |                  |                        | Women   |                  |                        |
|--------------------------|---------|------------------|------------------------|---------|------------------|------------------------|
|                          | Persons | Person-<br>years | Incidence<br>rate* (n) | Persons | Person-<br>years | Incidence<br>rate* (n) |
| 60-69                    | 7,028   | 29,816           | 100.8 (3,005)          | 7,796   | 33,477           | 96.9 (3,244)           |
| 70-79                    | 2,930   | 10,061           | 171.9 (1,729)          | 3,680   | 13,006           | 157.2 (2,045)          |
| ≥ 80                     | 942     | 3,093            | 219.5 (679)            | 1,848   | 6,105            | 231.0 (1,410)          |
| 0-64                     | 42,953  | 432,089          | 19.0 (8,213)           | 45,157  | 459,919          | 21.2 (9,761)           |
| ≥ 65                     | 5,572   | 24,764           | 153.1 (3,792)          | 7,224   | 32,177           | 155.9 (5,018)          |
| All ages                 | 45,583  | 456,853          | 26.3 (12,005)          | 49,033  | 492,097          | 30.0 (14,779)          |
| Standardized†            | ---     | ---              | 25.7                   | ---     | ---              | 27.0                   |

\* Incidence rates are reported per 1,000 person-years.

† Incidence rates were directly standardized to the total US population from the 2010 US Decennial Census after removing the number of people with prevalent multimorbidity (≥ 3 chronic conditions) as projected from our previous study (see Supplementary Table B).<sup>16</sup>

**Table 3.** Incidence rates (per 1,000 person-years) and composition of the most common dyads and triads of chronic conditions in persons living in Olmsted County, MN by age and sex.

| Age<br>(years)<br>Rank * | Dyad          |            |               |            | Triad            |            |                  |            |
|--------------------------|---------------|------------|---------------|------------|------------------|------------|------------------|------------|
|                          | Men           |            | Women         |            | Men              |            | Women            |            |
|                          | Combination † | Rate (n) ‡ | Combination † | Rate (n) ‡ | Combination †    | Rate (n) § | Combination †    | Rate (n) § |
| <b>0 – 19</b>            |               |            |               |            |                  |            |                  |            |
| 1                        | DEP - AST     | 1.8 (257)  | DEP - AST     | 2.9 (395)  | DEP - AST - SUB  | 0.4 (53)   | DEP - AST - SUB  | 0.4 (62)   |
| 2                        | DEP - SUB     | 1.3 (178)  | DEP - SUB     | 1.8 (240)  | DEP - AST - COPD | 0.1 (17)   | DEP - AST - COPD | 0.3 (39)   |
| 3                        | AST - COPD    | 0.9 (122)  | AST - COPD    | 0.7 (91)   | DEP - SUB - SZO  | 0.1 (8)    | DEP - ARR - AST  | 0.2 (27)   |
| 4                        | AST - SUB     | 0.4 (56)   | DEP - ARR     | 0.4 (50)   | LIP - DEP - AST  | <0.1 (7)   | DEP - ARR - SUB  | 0.1 (13)   |
| 5                        | DEP - ARR     | 0.1 (21)   | DEP - COPD    | 0.4 (48)   | 3-way tie ¶      | < 0.1 (6)  | DEP - SUB - COPD | 0.1 (12)   |
| <b>20 – 39</b>           |               |            |               |            |                  |            |                  |            |
| 1                        | DEP - SUB     | 3.5 (525)  | DEP - AST     | 3.4 (531)  | DEP - AST - SUB  | 0.4 (73)   | DEP - AST - SUB  | 0.8 (134)  |
| 2                        | LIP - HTN     | 1.4 (207)  | DEP - SUB     | 2.9 (463)  | DEP - SUB - SZO  | 0.4 (69)   | DEP - AST - COPD | 0.7 (121)  |
| 3                        | DEP - AST     | 1.1 (174)  | DEP - CAN     | 2.0 (309)  | LIP - HTN - DIA  | 0.4 (65)   | DEP - ARR - AST  | 0.4 (77)   |
| 4                        | LIP - DEP     | 1.0 (155)  | LIP - DEP     | 1.7 (267)  | DEP - ARR - SUB  | 0.3 (46)   | DEP - SUB - COPD | 0.3 (61)   |
| 5                        | LIP - DIA     | 0.9 (137)  | DEP - ARR     | 1.4 (222)  | LIP - HTN - DEP  | 0.3 (45)   | LIP - DEP - AST  | 0.3 (58)   |
| <b>40 – 49</b>           |               |            |               |            |                  |            |                  |            |
| 1                        | LIP - HTN     | 7.0 (580)  | LIP - DEP     | 4.1 (354)  | LIP - HTN - DIA  | 3.1 (294)  | LIP - HTN - DIA  | 1.4 (147)  |
| 2                        | LIP - DIA     | 4.4 (363)  | LIP - HTN     | 3.6 (308)  | LIP - HTN - DEP  | 1.2 (115)  | LIP - HTN - DEP  | 1.1 (114)  |
| 3                        | LIP - DEP     | 3.5 (285)  | DEP - ART     | 2.6 (224)  | LIP - HTN - ART  | 0.9 (84)   | LIP - DEP - DIA  | 1.0 (99)   |
| 4                        | LIP - ART     | 2.4 (198)  | DEP - CAN     | 2.6 (224)  | LIP - HTN - CAD  | 0.9 (83)   | LIP - DEP - ART  | 0.8 (84)   |
| 5                        | DEP - SUB     | 1.9 (157)  | HTN - DEP     | 2.4 (203)  | LIP - DEP - DIA  | 0.8 (74)   | LIP - DEP - AST  | 0.6 (63)   |
| <b>50 – 59</b>           |               |            |               |            |                  |            |                  |            |
| 1                        | LIP - HTN     | 14.5 (757) | LIP - HTN     | 9.8 (540)  | LIP - HTN - DIA  | 7.2 (504)  | LIP - HTN - DIA  | 3.9 (300)  |
| 2                        | LIP - DIA     | 8.7 (455)  | LIP - ART     | 6.5 (359)  | LIP - HTN - ART  | 3.5 (242)  | LIP - HTN - ART  | 3.0 (232)  |
| 3                        | LIP - ART     | 6.7 (351)  | LIP - DEP     | 5.9 (325)  | LIP - HTN - CAD  | 3.0 (208)  | LIP - HTN - DEP  | 2.4 (185)  |
| 4                        | LIP - CAN     | 4.6 (241)  | DEP - ART     | 4.8 (265)  | LIP - HTN - DEP  | 1.9 (131)  | LIP - DEP - ART  | 2.4 (180)  |
| 5                        | HTN - DIA     | 4.4 (227)  | LIP - CAN     | 4.5 (246)  | LIP - HTN - ARR  | 1.7 (117)  | LIP - HTN - CAN  | 1.8 (136)  |

Table 3. Continued 1

| Age<br>(years)<br>Rank * | Dyad          |            |               |            | Triad           |            |                 |            |
|--------------------------|---------------|------------|---------------|------------|-----------------|------------|-----------------|------------|
|                          | Men           |            | Women         |            | Men             |            | Women           |            |
|                          | Combination † | Rate (n) ‡ | Combination † | Rate (n) ‡ | Combination †   | Rate (n) § | Combination †   | Rate (n) § |
| <b>60 – 69</b>           |               |            |               |            |                 |            |                 |            |
| 1                        | LIP - HTN     | 23.4 (460) | LIP - HTN     | 18.8 (400) | LIP - HTN - DIA | 11.6 (366) | LIP - HTN - ART | 10.3 (363) |
| 2                        | LIP - DIA     | 11.5 (226) | LIP - ART     | 15.5 (330) | LIP - HTN - ART | 6.8 (214)  | LIP - HTN - DIA | 7.4 (263)  |
| 3                        | LIP - ART     | 11.4 (224) | HTN - ART     | 10.4 (220) | LIP - HTN - CAD | 6.3 (200)  | LIP - HTN - CAN | 4.6 (164)  |
| 4                        | LIP - CAN     | 10.0 (196) | LIP - CAN     | 6.8 (145)  | LIP - HTN - CAN | 4.9 (155)  | LIP - ART - CAN | 2.9 (102)  |
| 5                        | HTN - DIA     | 8.6 (169)  | LIP - DIA     | 6.4 (135)  | LIP - HTN - ARR | 3.4 (106)  | LIP - DIA - ART | 2.7 (95)   |
| 6                        | HTN - ART     | 7.7 (152)  | ART - CAN     | 4.9 (105)  | LIP - DIA - ART | 2.9 (91)   | LIP - HTN - DEP | 2.6 (93)   |
| 7                        | LIP - CAD     | 6.9 (136)  | LIP - OST     | 4.9 (105)  | LIP - ART - CAN | 2.6 (82)   | LIP - DEP - ART | 2.5 (89)   |
| 8                        | HTN - CAN     | 6.2 (121)  | HTN - CAN     | 4.8 (103)  | LIP - DIA - CAD | 2.4 (76)   | LIP - ART - ARR | 2.3 (83)   |
| 9                        | ART - CAN     | 4.5 (89)   | HTN - DIA     | 4.6 (97)   | HTN - DIA - ART | 2.2 (71)   | LIP - HTN - OST | 2.2 (79)   |
| 10                       | LIP - ARR     | 4.5 (88)   | LIP - DEP     | 4.4 (94)   | LIP - ARR - CAD | 2.2 (68)   | HTN - DIA - ART | 2.2 (77)   |
| <b>70 – 79</b>           |               |            |               |            |                 |            |                 |            |
| 1                        | LIP - HTN     | 19.1 (104) | LIP - HTN     | 26.0 (173) | LIP - HTN - CAN | 11.9 (127) | LIP - HTN - ART | 15.7 (214) |
| 2                        | HTN - CAN     | 18.9 (103) | HTN - ART     | 18.5 (123) | LIP - HTN - DIA | 10.4 (111) | LIP - HTN - DIA | 9.8 (134)  |
| 3                        | LIP - CAN     | 15.0 (82)  | LIP - ART     | 15.5 (103) | LIP - HTN - CAD | 9.7 (103)  | LIP - HTN - CAN | 6.0 (82)   |
| 4                        | HTN - ART     | 13.2 (72)  | LIP - OST     | 9.0 (60)   | LIP - HTN - ART | 9.4 (100)  | LIP - ART - CAN | 5.4 (74)   |
| 5                        | ART - CAN     | 11.6 (63)  | HTN - CAN     | 8.9 (59)   | LIP - HTN - ARR | 5.5 (58)   | HTN - ART - CAN | 5.2 (71)   |
| 6                        | LIP - ART     | 11.6 (63)  | HTN - OST     | 8.3 (55)   | HTN - ART - CAN | 4.9 (52)   | LIP - ART - OST | 5.2 (71)   |
| 7                        | HTN - DIA     | 10.1 (55)  | ART - CAN     | 8.1 (54)   | LIP - ART - CAN | 4.7 (50)   | LIP - HTN - OST | 4.6 (63)   |
| 8                        | HTN - ARR     | 9.9 (54)   | ART - OST     | 7.8 (52)   | HTN - CAN - ARR | 4.2 (45)   | LIP - HTN - ARR | 4.5 (62)   |
| 9                        | LIP - CAD     | 7.7 (42)   | HTN - DIA     | 7.8 (52)   | HTN - ART - ARR | 4.1 (44)   | HTN - ART - OST | 4.0 (55)   |
| 10                       | LIP - DIA     | 7.7 (42)   | LIP - CAN     | 7.8 (52)   | LIP - DIA - CAN | 4.1 (44)   | 2-way tie ¶     | 3.4 (47)   |
| <b>≥ 80</b>              |               |            |               |            |                 |            |                 |            |
| 1                        | HTN - CAN     | 18.9 (30)  | HTN - ART     | 27.7 (80)  | HTN - CAN - ARR | 8.7 (28)   | LIP - HTN - ART | 10.3 (66)  |
| 2                        | HTN - ARR     | 17.6 (28)  | LIP - HTN     | 23.2 (67)  | LIP - HTN - CAN | 7.7 (25)   | HTN - ART - OST | 9.8 (63)   |
| 3                        | HTN - ART     | 14.5 (23)  | HTN - ARR     | 17.7 (51)  | HTN - ART - CAN | 7.4 (24)   | HTN - ART - CAN | 9.2 (59)   |

Table 3. Continued 2

| Age (years)<br>Rank * | Dyad          |            |               |            | Triad           |            |                 |            |
|-----------------------|---------------|------------|---------------|------------|-----------------|------------|-----------------|------------|
|                       | Men           |            | Women         |            | Men             |            | Women           |            |
|                       | Combination † | Rate (n) ‡ | Combination † | Rate (n) ‡ | Combination †   | Rate (n) § | Combination †   | Rate (n) § |
| 4                     | ART - ARR     | 12.0 (19)  | HTN - CAN     | 15.2 (44)  | LIP - HTN - ART | 6.2 (20)   | HTN - ART - ARR | 9.0 (58)   |
| 5                     | CAN - ARR     | 12.0 (19)  | HTN - OST     | 14.9 (43)  | LIP - HTN - ARR | 5.9 (19)   | LIP - HTN - OST | 5.9 (38)   |
| 6                     | HTN - CAD     | 10.1 (16)  | HTN - DEM     | 11.8 (34)  | ART - CAN - ARR | 5.3 (17)   | LIP - HTN - DIA | 5.0 (32)   |
| 7                     | LIP - HTN     | 10.1 (16)  | ART - CAN     | 10.0 (29)  | HTN - ART - ARR | 5.3 (17)   | LIP - HTN - ARR | 4.7 (30)   |
| 8                     | ART - CAN     | 8.8 (14)   | ART - OST     | 9.7 (28)   | HTN - CAN - CAD | 5.0 (16)   | LIP - HTN - CAN | 4.5 (29)   |
| 9                     | CAN - CAD     | 8.8 (14)   | HTN - CKD     | 7.6 (22)   | LIP - HTN - CAD | 5.0 (16)   | ART - CAN - OST | 4.4 (28)   |
| 10                    | HTN - DEM     | 8.8 (14)   | 3-way tie **  | 7.3 (21)   | LIP - ART - CAN | 4.6 (15)   | LIP - HTN - CAD | 3.9 (25)   |

\* Rank order from the most frequent to the least frequent incident dyad or triad. For the younger age groups (through age 59 years), we reported the 5 most frequent incident combinations; for the older age groups (60 years and older), we reported the 10 most frequent incident combinations.

† Definition of acronyms in order of frequency: LIP = hyperlipidemia; HTN = hypertension; DEP = depression; DIA = diabetes; ART = arthritis; CAN = cancer; ARR = cardiac arrhythmias; AST = asthma; CAD = coronary artery disease; SUB = substance abuse disorders; COPD = chronic obstructive pulmonary disease; OST = osteoporosis; CKD = chronic kidney disease; STR = stroke; CHF = congestive heart failure; DEM = dementia; SZO = schizophrenia; HEP = hepatitis; AUT = autism spectrum disorder; and HIV = human immunodeficiency virus.

‡ Incidence rates per 1,000 person years. Rates can be calculated by dividing the number of incident persons in parentheses by the person-years at risk of 2 conditions from each age- and sex-specific stratum for all ethnic groups combined in Table 1.

§ Incidence rates per 1,000 person years. Rates can be calculated by dividing the number of incident persons in parentheses by the person-years at risk of 3 conditions from each age- and sex-specific stratum for all ethnic groups combined in Table 2.

|| Three-way tie for the rank 5 triad in men ages 0-19 years: 1) AST-SUB-COPD; 2) DEP-ARR-SUB; 3) DEP-AST-DEM.

¶ Two-way tie for the rank 10 triad in women ages 70-79 years: 1) HTN-ART-ARR; 2) LIP-CAN-OST.

\*\* Three-way tie for the rank 10 dyad in women ages ≥ 80 years: 1) ART-ARR; 2) HTN-DIA; 3) LIP-ART.

## Figure Legends

**Figure 1.** Age- and sex-specific incidence rates (per 1,000 person-years) of the 20 chronic conditions considered separately. The 20 panels are presented by rows in decreasing order of frequency (by overall age- and sex-standardized prevalence).<sup>16</sup>

**Figure 2.** Incidence rates (per 1,000 person-years) of 2 chronic conditions (second condition in a dyad) and of 3 chronic conditions (third condition in a triad) in men and women separately (panels A and C), and stratified by ethnicity (panels B and D).

Figure 1

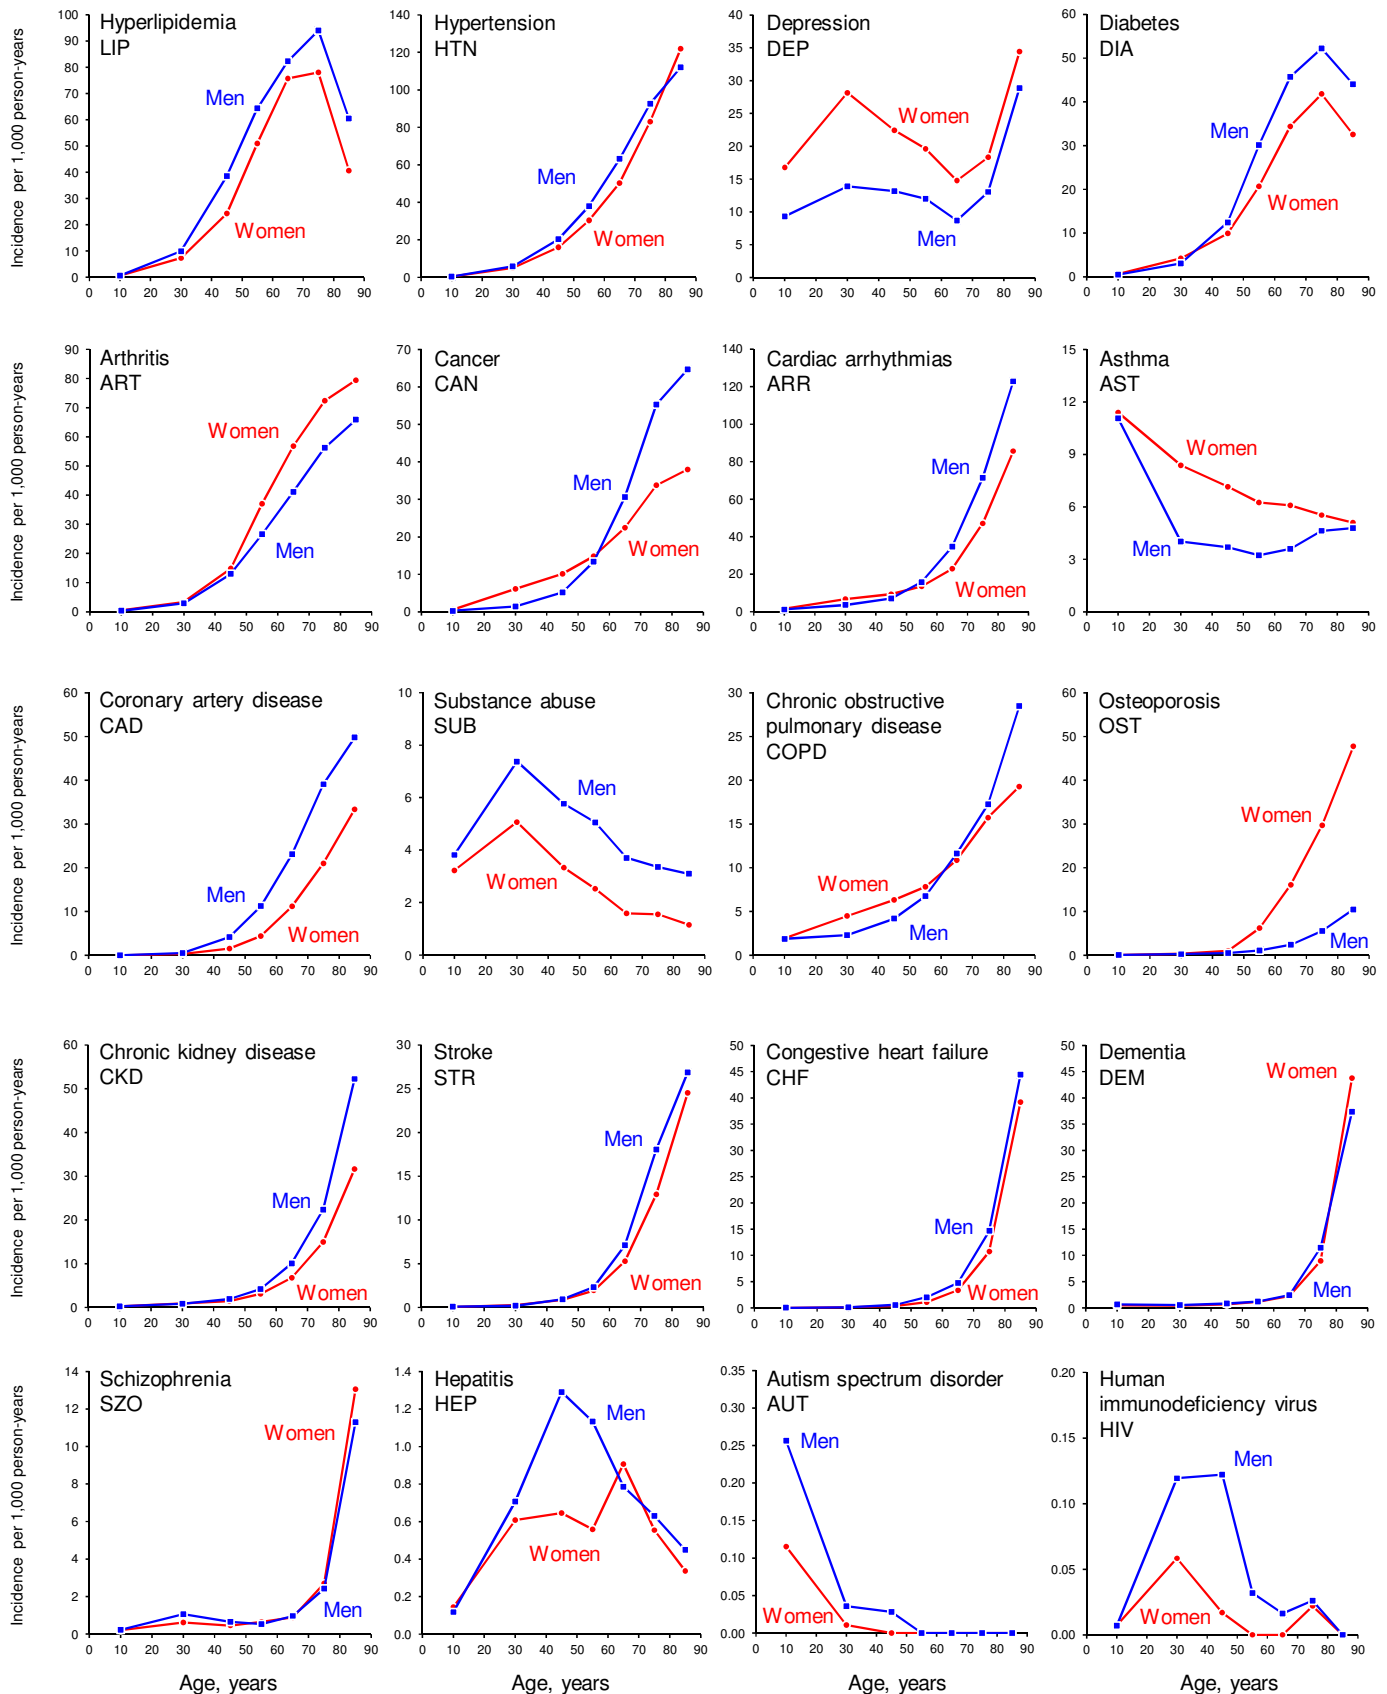

Figure 2

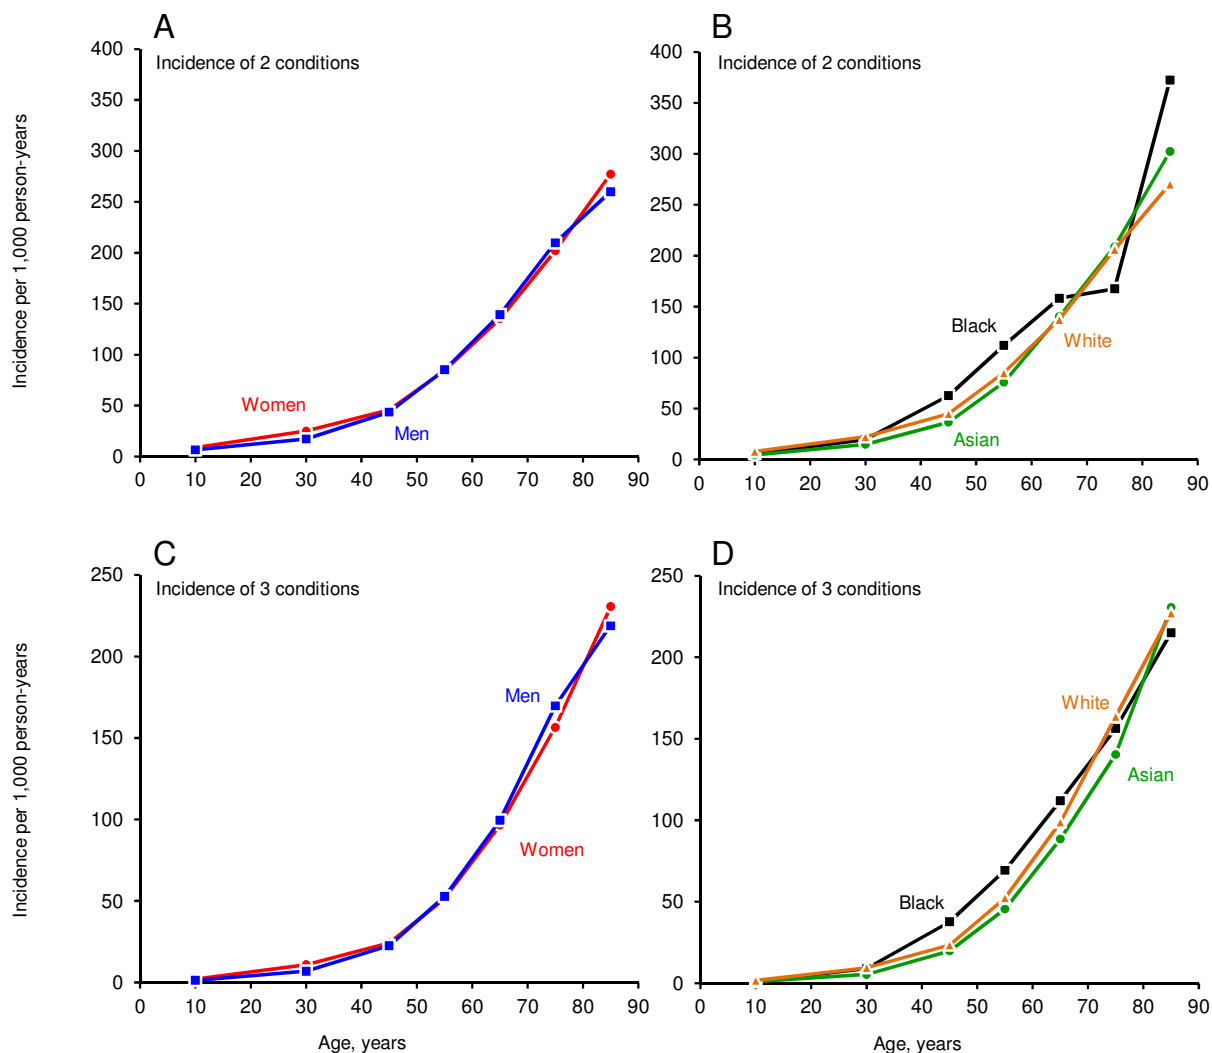

For peer review only

**Appendix 1:** Supplementary tables A-C [posted as supplied by the authors]**Supplementary table A.** List of the twenty chronic conditions selected by the US-DHHS \*

| Description †           | Acronym<br>or<br>Abbreviation | CCC ‡    | CMS (ICD-9 codes) §                                                                                                                                                                                                                                                                                                                                                                                                                                                                                                                                           |
|-------------------------|-------------------------------|----------|---------------------------------------------------------------------------------------------------------------------------------------------------------------------------------------------------------------------------------------------------------------------------------------------------------------------------------------------------------------------------------------------------------------------------------------------------------------------------------------------------------------------------------------------------------------|
| Hyperlipidemia          | LIP                           | 53       | 272.0, 272.1, 272.2, 272.3, 272.4                                                                                                                                                                                                                                                                                                                                                                                                                                                                                                                             |
| Hypertension            | HTN                           | 98, 99   | 401.0, 401.1, 401.9, 402.00, 402.01, 402.10, 402.11, 402.90, 402.91, 403.00, 403.01, 403.10, 403.11, 403.90, 403.91, 404.00, 404.01, 404.02, 404.03, 404.10, 404.11, 404.12, 404.13, 404.90, 404.91, 404.92, 404.93, 405.01, 405.09, 405.11, 405.19, 405.91, 405.99, 362.11, 437.2                                                                                                                                                                                                                                                                            |
| Depression              | DEP                           | 657      | 296.20, 296.21, 296.22, 296.23, 296.24, 296.25, 296.26, 296.30, 296.31, 296.32, 296.33, 296.34, 296.35, 296.36, 296.51, 296.52, 296.53, 296.54, 296.55, 296.56, 296.60, 296.61, 296.62, 296.63, 296.64, 296.65, 296.66, 296.89, 298.0, 300.4, 309.1, 311                                                                                                                                                                                                                                                                                                      |
| Diabetes                | DIA                           | 49,50    | 249.00, 249.01, 249.10, 249.11, 249.20, 249.21, 249.30, 249.31, 249.40, 249.41, 249.50, 249.51, 249.60, 249.61, 249.70, 249.71, 249.80, 249.81, 249.90, 249.91, 250.00, 250.01, 250.02, 250.03, 250.10, 250.11, 250.12, 250.13, 250.20, 250.21, 250.22, 250.23, 250.30, 250.31, 250.32, 250.33, 250.40, 250.41, 250.42, 250.43, 250.50, 250.51, 250.52, 250.53, 250.60, 250.61, 250.62, 250.63, 250.70, 250.71, 250.72, 250.73, 250.80, 250.81, 250.82, 250.83, 250.90, 250.91, 250.92, 250.93, 357.2, 362.01, 362.02, 362.03, 362.04, 362.05, 362.06, 366.41 |
| Arthritis               | ART                           | 202, 203 | 714.0, 714.1, 714.2, 714.30, 714.31, 714.32, 714.33, 715.00, 715.04, 715.09, 715.10, 715.11, 715.12, 715.13, 715.14, 715.15, 715.16, 715.17, 715.18, 715.20, 715.21, 715.22, 715.23, 715.24, 715.25, 715.26, 715.27, 715.28, 715.30, 715.31, 715.32, 715.33, 715.34, 715.35, 715.36, 715.37, 715.38, 715.80, 715.89, 715.90, 715.91, 715.92, 715.93, 715.94, 715.95, 715.96, 715.97, 715.98, 720.0, 721.0, 721.1, 721.2, 721.3, 721.90, 721.91                                                                                                                |
| Cancer                  | CAN                           | 11-43    | Female breast cancer: 174.0, 174.1, 174.2, 174.3, 174.4, 174.5, 174.6, 174.8, 174.9, 175.0, 175.9, 233.0, V10.3. Colorectal cancer: 154.0, 154.1, 153.0, 153.1, 153.2, 153.3, 153.4, 153.5, 153.6, 153.7, 153.8, 153.9, 230.3, 230.4, V10.05. Prostate cancer: 185, 233.4, V10.46. Lung cancer: 162.2, 162.3, 162.4, 162.5, 162.8, 162.9, 231.2, V10.11.                                                                                                                                                                                                      |
| Cardiac arrhythmias     | ARR                           | 105-106  | 427.31                                                                                                                                                                                                                                                                                                                                                                                                                                                                                                                                                        |
| Asthma                  | AST                           | 128      | 493.00, 493.01, 493.02, 493.10, 493.11, 493.12, 493.20, 493.21, 493.22, 493.81, 493.82, 493.90, 493.91, 493.92                                                                                                                                                                                                                                                                                                                                                                                                                                                |
| Coronary artery disease | CAD                           | 100, 101 | 410.00, 410.01, 410.02, 410.10, 410.11, 410.12, 410.20, 410.21, 410.22, 410.30, 410.31, 410.32, 410.40, 410.41, 410.42, 410.50, 410.51, 410.52, 410.60, 410.61, 410.62, 410.70, 410.71, 410.72, 410.80, 410.81, 410.82, 410.90, 410.91, 410.92, 411.0, 411.1, 411.81, 411.89, 412, 413.0, 413.1, 413.9, 414.00, 414.01, 414.02, 414.03, 414.04, 414.05, 414.06, 414.07, 414.12, 414.2, 414.3, 414.8, 414.9                                                                                                                                                    |



**Supplementary table A.** List of the twenty chronic conditions selected by the US-DHHS \*  
(continued)

| Description †                                               | Acronym<br>or<br>Abbreviation | CCC ‡                           | CMS (ICD-9 codes) §                                                                                                                                                                                                                                                                                                                                                                                                                                                                                                                                                                                                                                                                                                       |
|-------------------------------------------------------------|-------------------------------|---------------------------------|---------------------------------------------------------------------------------------------------------------------------------------------------------------------------------------------------------------------------------------------------------------------------------------------------------------------------------------------------------------------------------------------------------------------------------------------------------------------------------------------------------------------------------------------------------------------------------------------------------------------------------------------------------------------------------------------------------------------------|
| Substance abuse disorders (drug and alcohol)                | SUB                           | 660-661                         | Not applicable                                                                                                                                                                                                                                                                                                                                                                                                                                                                                                                                                                                                                                                                                                            |
| Chronic obstructive pulmonary disease                       | COPD                          | 127                             | 490, 491.0, 491.1, 491.20, 491.21, 491.22, 491.8, 491.9, 492.0, 492.8, 494.0, 494.1, 496                                                                                                                                                                                                                                                                                                                                                                                                                                                                                                                                                                                                                                  |
| Osteoporosis                                                | OST                           | 206                             | 733.00, 733.01, 733.02, 733.03, 733.09                                                                                                                                                                                                                                                                                                                                                                                                                                                                                                                                                                                                                                                                                    |
| Chronic kidney disease                                      | CKD                           | 158                             | 016.00, 016.01, 016.02, 016.03, 016.04, 016.05, 016.06, 095.4, 189.0, 189.9, 223.0, 236.91, 249.40, 249.41, 250.40, 250.41, 250.42, 250.43, 271.4, 274.10, 283.11, 403.01, 403.11, 403.91, 404.02, 404.03, 404.12, 404.13, 404.92, 404.93, 440.1, 442.1, 572.4, 580.0, 580.4, 580.81, 580.89, 580.9, 581.0, 581.1, 581.2, 581.3, 581.81, 581.89, 581.9, 582.0, 582.1, 582.2, 582.4, 582.81, 582.89, 582.9, 583.0, 583.1, 583.2, 583.4, 583.6, 583.7, 583.81, 583.89, 583.9, 584.5, 584.6, 584.7, 584.8, 584.9, 585.1, 585.2, 585.3, 585.4, 585.5, 585.6, 585.9, 586, 587, 588.0, 588.1, 588.81, 588.89, 588.9, 591, 753.12, 753.13, 753.14, 753.15, 753.16, 753.17, 753.19, 753.20, 753.21, 753.22, 753.23, 753.29, 794.4 |
| Stroke                                                      | STR                           | 109-112                         | 430, 431, 433.01, 433.11, 433.21, 433.31, 433.81, 433.91, 434.00, 434.01, 434.10, 434.11, 434.90, 434.91, 435.0, 435.1, 435.3, 435.8, 435.9, 436, 997.02                                                                                                                                                                                                                                                                                                                                                                                                                                                                                                                                                                  |
| Congestive heart failure                                    | CHF                           | 108                             | 398.91, 402.01, 402.11, 402.91, 404.01, 404.11, 404.91, 404.03, 404.13, 404.93, 428.0, 428.1, 428.20, 428.21, 428.22, 428.23, 428.30, 428.31, 428.32, 428.33, 428.40, 428.41, 428.42, 428.43, 428.9                                                                                                                                                                                                                                                                                                                                                                                                                                                                                                                       |
| Dementia (including Alzheimer's and other senile dementias) | DEM                           | 653                             | 331.0, 331.11, 331.19, 331.2, 331.7, 290.0, 290.10, 290.11, 290.12, 290.13, 290.20, 290.21, 290.3, 290.40, 290.41, 290.42, 290.43, 294.0, 294.10, 294.11, 294.8, 797                                                                                                                                                                                                                                                                                                                                                                                                                                                                                                                                                      |
| Schizophrenia                                               | SZO                           | 659                             | Not applicable                                                                                                                                                                                                                                                                                                                                                                                                                                                                                                                                                                                                                                                                                                            |
| Hepatitis                                                   | HEP                           | 6                               | Not applicable                                                                                                                                                                                                                                                                                                                                                                                                                                                                                                                                                                                                                                                                                                            |
| Autism spectrum disorder                                    | AUT                           | 299.00,<br>299.01 <sup>  </sup> | Not applicable                                                                                                                                                                                                                                                                                                                                                                                                                                                                                                                                                                                                                                                                                                            |
| Human immunodeficiency virus (HIV)                          | HIV                           | 5                               | Not applicable                                                                                                                                                                                                                                                                                                                                                                                                                                                                                                                                                                                                                                                                                                            |

\* CCC = Clinical Classification Codes; CMS = Centers for Medicare and Medicaid Services; ICD-9 = International Classification of Diseases, 9<sup>th</sup> revision; US-DHHS = US Department of Health and Human Services.

† The 20 conditions were defined by the US-DHHS as detailed elsewhere. (Goodman et al., 2013) Each condition is defined by having a code in either the CCC group of codes or the CMS group of codes. Conditions are listed in decreasing order of frequency (by overall age and sex standardized prevalence; same order as in Figure 1).

‡ We list the CCC chapters developed by the Agency for Healthcare Research and Quality (AHRQ). Each CCC chapter includes a list of ICD-9 codes as detailed elsewhere. (Cohen et al., 2009)

§ We list the ICD-9 codes defined in the Chronic Conditions Data Warehouse of the CMS.

<sup>||</sup> Autism-spectrum disorder is not defined in either the CCC or the CMS code groupings, but rather is defined by two distinct ICD-9 codes.

**Supplementary table B.** Total US population used for direct standardization of incidence rates

| Age                                       | Men                       |                      |                          | Women                     |                      |                          | Adjusting population <sup>§</sup> |
|-------------------------------------------|---------------------------|----------------------|--------------------------|---------------------------|----------------------|--------------------------|-----------------------------------|
|                                           | US Total (n) <sup>*</sup> | Prev. % <sup>†</sup> | At risk (n) <sup>‡</sup> | US Total (n) <sup>*</sup> | Prev. % <sup>†</sup> | At risk (n) <sup>‡</sup> |                                   |
| <b>Prevalence of 2 chronic conditions</b> |                           |                      |                          |                           |                      |                          |                                   |
| 0-19 y                                    | 42,592                    | 1.26                 | 42,054                   | 40,675                    | 1.40                 | 40,108                   | 82,162                            |
| 20-39 y                                   | 41,688                    | 6.98                 | 38,779                   | 41,140                    | 8.74                 | 37,546                   | 76,325                            |
| 40-49 y                                   | 21,603                    | 20.37                | 17,202                   | 21,995                    | 19.71                | 17,660                   | 34,862                            |
| 50-59 y                                   | 20,456                    | 38.13                | 12,657                   | 21,505                    | 35.77                | 13,813                   | 26,470                            |
| 60-69 y                                   | 13,930                    | 59.41                | 5,654                    | 15,323                    | 58.35                | 6,381                    | 12,036                            |
| 70-79 y                                   | 7,427                     | 79.73                | 1,506                    | 9,170                     | 78.27                | 1,993                    | 3,498                             |
| ≥ 80 y                                    | 4,084                     | 87.86                | 496                      | 7,152                     | 86.41                | 972                      | 1,467                             |
| <b>Prevalence of 3 chronic conditions</b> |                           |                      |                          |                           |                      |                          |                                   |
| 0-19 y                                    | 42,592                    | 0.17                 | 42,521                   | 40,675                    | 0.25                 | 40,575                   | 83,096                            |
| 20-39 y                                   | 41,688                    | 2.12                 | 40,805                   | 41,140                    | 2.57                 | 40,083                   | 80,887                            |
| 40-49 y                                   | 21,603                    | 9.40                 | 19,572                   | 21,995                    | 8.55                 | 20,115                   | 39,687                            |
| 50-59 y                                   | 20,456                    | 21.06                | 16,148                   | 21,505                    | 19.30                | 17,355                   | 33,503                            |
| 60-69 y                                   | 13,930                    | 40.88                | 8,235                    | 15,323                    | 38.32                | 9,452                    | 17,687                            |
| 70-79 y                                   | 7,427                     | 65.11                | 2,591                    | 9,170                     | 62.05                | 3,480                    | 6,071                             |
| ≥ 80 y                                    | 4,084                     | 78.93                | 861                      | 7,152                     | 74.17                | 1,848                    | 2,708                             |

\* Population (in thousands) of the entire United States from the decennial census of 2010.

† Prevalence of 2 or 3 chronic conditions from our previous study in Olmsted County, MN. (Rocca et., al, In Press)

‡ Total population at risk (in thousands) after removing the estimated prevalent persons who have already reached 2 or 3 chronic conditions.

§ The total population (in thousands) used in Tables 1 and 2 for direct standardization.

**Supplementary table C.** Incidence of twenty chronic conditions considered individually

| Condition<br>age (years) | Men     |                  |                         | Women   |                  |                         |
|--------------------------|---------|------------------|-------------------------|---------|------------------|-------------------------|
|                          | Persons | Person-<br>years | Incidence<br>rate * (n) | Persons | Person-<br>years | Incidence<br>rate * (n) |
| <b>Hyperlipidemia</b>    |         |                  |                         |         |                  |                         |
| 0-19                     | 18,996  | 143,882          | 0.6 (91)                | 18,174  | 138,140          | 0.7 (94)                |
| 20-39                    | 28,437  | 159,373          | 10.0 (1,586)            | 30,040  | 179,745          | 7.3 (1,311)             |
| 40-49                    | 16,512  | 82,705           | 38.5 (3,186)            | 18,328  | 99,834           | 24.3 (2,428)            |
| 50-59                    | 11,993  | 54,436           | 64.4 (3,504)            | 14,248  | 68,637           | 51.0 (3,500)            |
| 60-69                    | 6,023   | 25,216           | 82.4 (2,077)            | 7,111   | 30,967           | 75.7 (2,345)            |
| 70-79                    | 3,077   | 11,661           | 94.1 (1,097)            | 3,821   | 14,970           | 78.0 (1,168)            |
| ≥ 80                     | 1,712   | 7,163            | 60.5 (433)              | 3,319   | 15,777           | 40.6 (641)              |
| <b>Hypertension</b>      |         |                  |                         |         |                  |                         |
| 0-19                     | 19,029  | 144,237          | 0.5 (65)                | 18,215  | 138,569          | 0.4 (51)                |
| 20-39                    | 28,626  | 162,582          | 5.9 (954)               | 30,315  | 183,220          | 5.0 (908)               |
| 40-49                    | 17,289  | 92,372           | 20.4 (1,882)            | 18,790  | 105,079          | 16.0 (1,683)            |
| 50-59                    | 13,481  | 67,250           | 38.0 (2,556)            | 15,013  | 77,172           | 30.3 (2,341)            |
| 60-69                    | 7,077   | 31,540           | 63.2 (1,993)            | 7,971   | 36,990           | 50.3 (1,859)            |
| 70-79                    | 3,331   | 13,402           | 92.6 (1,241)            | 3,941   | 16,136           | 83.0 (1,339)            |
| ≥ 80                     | 1,354   | 5,198            | 112.0 (582)             | 2,053   | 7,919            | 121.9 (965)             |
| <b>Depression</b>        |         |                  |                         |         |                  |                         |
| 0-19                     | 18,794  | 139,315          | 9.3 (1,297)             | 17,774  | 131,126          | 16.8 (2,198)            |
| 20-39                    | 27,342  | 150,493          | 13.9 (2,091)            | 27,026  | 146,257          | 28.2 (4,118)            |
| 40-49                    | 17,234  | 94,033           | 13.2 (1,238)            | 16,533  | 89,742           | 22.4 (2,013)            |
| 50-59                    | 15,027  | 81,059           | 12.0 (974)              | 14,642  | 77,962           | 19.6 (1,530)            |
| 60-69                    | 10,174  | 54,355           | 8.7 (472)               | 10,229  | 54,471           | 14.8 (805)              |
| 70-79                    | 6,720   | 34,274           | 13.0 (447)              | 7,408   | 37,536           | 18.3 (688)              |
| ≥ 80                     | 3,482   | 17,009           | 28.9 (491)              | 5,313   | 28,290           | 34.4 (974)              |
| <b>Diabetes</b>          |         |                  |                         |         |                  |                         |
| 0-19                     | 19,025  | 144,155          | 0.5 (68)                | 18,190  | 138,186          | 0.7 (90)                |
| 20-39                    | 28,799  | 165,115          | 3.0 (503)               | 30,406  | 184,616          | 4.2 (775)               |
| 40-49                    | 18,193  | 100,104          | 12.4 (1,246)            | 19,617  | 112,231          | 9.9 (1,112)             |
| 50-59                    | 15,419  | 80,259           | 30.1 (2,417)            | 17,181  | 92,695           | 20.7 (1,917)            |
| 60-69                    | 9,394   | 45,589           | 45.7 (2,084)            | 10,854  | 55,408           | 34.4 (1,906)            |
| 70-79                    | 5,427   | 25,396           | 52.2 (1,326)            | 6,966   | 33,383           | 41.8 (1,395)            |
| ≥ 80                     | 2,840   | 13,550           | 44.1 (597)              | 5,074   | 26,909           | 32.6 (876)              |
| <b>Arthritis</b>         |         |                  |                         |         |                  |                         |
| 0-19                     | 19,032  | 144,320          | 0.3 (49)                | 18,205  | 138,450          | 0.5 (68)                |
| 20-39                    | 28,827  | 165,354          | 2.9 (477)               | 30,425  | 185,391          | 3.4 (625)               |
| 40-49                    | 18,202  | 99,821           | 13.0 (1,298)            | 19,464  | 109,658          | 14.8 (1,628)            |
| 50-59                    | 15,324  | 79,753           | 26.6 (2,120)            | 16,304  | 83,158           | 37.0 (3,079)            |
| 60-69                    | 9,295   | 45,576           | 41.1 (1,874)            | 9,227   | 43,244           | 56.8 (2,458)            |
| 70-79                    | 5,193   | 23,106           | 56.3 (1,300)            | 5,185   | 22,090           | 72.3 (1,598)            |
| ≥ 80                     | 2,317   | 9,836            | 65.9 (648)              | 3,252   | 14,434           | 79.4 (1,146)            |

**Supplementary table C.** Incidence of twenty chronic conditions considered individually  
(continued 1)

| Condition<br>age (years)         | Men     |                  |                         | Women   |                  |                         |
|----------------------------------|---------|------------------|-------------------------|---------|------------------|-------------------------|
|                                  | Persons | Person-<br>years | Incidence<br>rate * (n) | Persons | Person-<br>years | Incidence<br>rate * (n) |
| <b>Cancer</b>                    |         |                  |                         |         |                  |                         |
| 0-19                             | 19,020  | 144,181          | 0.3 (40)                | 18,180  | 138,347          | 0.6 (84)                |
| 20-39                            | 28,832  | 166,077          | 1.5 (241)               | 29,734  | 176,247          | 6.1 (1,079)             |
| 40-49                            | 18,402  | 103,035          | 5.2 (534)               | 18,658  | 105,898          | 10.1 (1,072)            |
| 50-59                            | 15,899  | 85,763           | 13.4 (1,145)            | 16,361  | 89,149           | 14.8 (1,321)            |
| 60-69                            | 9,821   | 49,157           | 30.7 (1,507)            | 10,480  | 54,117           | 22.5 (1,215)            |
| 70-79                            | 5,146   | 23,169           | 55.3 (1,281)            | 6,552   | 31,563           | 33.7 (1,065)            |
| ≥ 80                             | 2,112   | 9,137            | 64.7 (591)              | 4,411   | 21,933           | 38.0 (833)              |
| <b>Cardiac arrhythmias</b>       |         |                  |                         |         |                  |                         |
| 0-19                             | 19,008  | 143,802          | 1.2 (170)               | 18,203  | 137,966          | 1.7 (228)               |
| 20-39                            | 28,736  | 164,530          | 3.6 (590)               | 30,250  | 181,665          | 6.7 (1,216)             |
| 40-49                            | 18,324  | 102,268          | 7.1 (722)               | 19,444  | 110,842          | 9.3 (1,036)             |
| 50-59                            | 15,939  | 85,675           | 15.8 (1,354)            | 17,211  | 94,404           | 13.5 (1,274)            |
| 60-69                            | 10,068  | 50,190           | 34.7 (1,741)            | 11,262  | 58,346           | 22.9 (1,337)            |
| 70-79                            | 5,514   | 24,370           | 71.4 (1,741)            | 7,095   | 33,211           | 47.1 (1,563)            |
| ≥ 80                             | 2,193   | 8,604            | 122.9 (1,057)           | 4,365   | 20,213           | 85.6 (1,731)            |
| <b>Asthma</b>                    |         |                  |                         |         |                  |                         |
| 0-19                             | 17,856  | 126,216          | 11.1 (1,395)            | 17,443  | 125,314          | 11.4 (1,428)            |
| 20-39                            | 27,126  | 155,022          | 4.0 (624)               | 28,383  | 168,182          | 8.4 (1,409)             |
| 40-49                            | 18,102  | 101,654          | 3.7 (376)               | 18,845  | 107,595          | 7.2 (770)               |
| 50-59                            | 16,129  | 89,329           | 3.2 (289)               | 16,920  | 94,186           | 6.3 (589)               |
| 60-69                            | 10,930  | 58,658           | 3.6 (211)               | 11,535  | 62,226           | 6.1 (379)               |
| 70-79                            | 7,051   | 36,059           | 4.6 (167)               | 7,987   | 41,216           | 5.5 (228)               |
| ≥ 80                             | 3,741   | 18,815           | 4.8 (90)                | 5,878   | 32,584           | 5.1 (166)               |
| <b>Coronary artery disease</b>   |         |                  |                         |         |                  |                         |
| 0-19                             | 19,050  | 144,593          | 0.0 (0)                 | 18,227  | 138,785          | 0.0 (0)                 |
| 20-39                            | 28,982  | 167,484          | 0.5 (79)                | 30,647  | 188,499          | 0.3 (50)                |
| 40-49                            | 18,565  | 104,424          | 4.1 (432)               | 20,213  | 117,920          | 1.5 (177)               |
| 50-59                            | 15,875  | 85,866           | 11.2 (963)              | 18,177  | 101,860          | 4.4 (446)               |
| 60-69                            | 9,540   | 47,996           | 23.1 (1,108)            | 11,891  | 62,970           | 11.2 (703)              |
| 70-79                            | 5,081   | 23,713           | 39.1 (927)              | 7,473   | 37,099           | 21.0 (779)              |
| ≥ 80                             | 2,213   | 10,046           | 49.8 (500)              | 4,868   | 25,325           | 33.4 (845)              |
| <b>Substance abuse disorders</b> |         |                  |                         |         |                  |                         |
| 0-19                             | 18,850  | 142,916          | 3.8 (545)               | 18,083  | 137,309          | 3.2 (443)               |
| 20-39                            | 28,004  | 157,109          | 7.4 (1,159)             | 29,846  | 179,474          | 5.1 (910)               |
| 40-49                            | 18,038  | 100,943          | 5.8 (582)               | 19,722  | 114,415          | 3.3 (381)               |
| 50-59                            | 16,085  | 89,151           | 5.1 (451)               | 18,013  | 101,745          | 2.5 (257)               |
| 60-69                            | 11,001  | 59,373           | 3.7 (220)               | 12,398  | 67,817           | 1.6 (108)               |
| 70-79                            | 7,194   | 37,259           | 3.4 (125)               | 8,599   | 44,899           | 1.6 (70)                |
| ≥ 80                             | 3,882   | 19,697           | 3.1 (61)                | 6,325   | 35,542           | 1.2 (41)                |

**Supplementary table C.** Incidence of twenty chronic conditions considered individually  
(continued 2)

| Condition<br>age (years)                     | Men     |                  |                         | Women   |                  |                         |
|----------------------------------------------|---------|------------------|-------------------------|---------|------------------|-------------------------|
|                                              | Persons | Person-<br>years | Incidence<br>rate * (n) | Persons | Person-<br>years | Incidence<br>rate * (n) |
| <b>Chronic obstructive pulmonary disease</b> |         |                  |                         |         |                  |                         |
| 0-19                                         | 18,973  | 142,682          | 1.9 (267)               | 18,140  | 136,992          | 1.9 (263)               |
| 20-39                                        | 28,674  | 164,415          | 2.3 (376)               | 30,052  | 181,106          | 4.5 (811)               |
| 40-49                                        | 18,348  | 103,031          | 4.2 (430)               | 19,432  | 111,533          | 6.3 (704)               |
| 50-59                                        | 16,170  | 88,965           | 6.7 (600)               | 17,425  | 96,719           | 7.8 (756)               |
| 60-69                                        | 10,615  | 55,796           | 11.6 (648)              | 11,556  | 61,640           | 10.9 (670)              |
| 70-79                                        | 6,439   | 32,418           | 17.2 (559)              | 7,661   | 38,688           | 15.7 (608)              |
| ≥ 80                                         | 3,234   | 15,771           | 28.5 (449)              | 5,397   | 29,472           | 19.3 (568)              |
| <b>Osteoporosis</b>                          |         |                  |                         |         |                  |                         |
| 0-19                                         | 19,048  | 144,579          | <0.1 (5)                | 18,226  | 138,759          | <0.1 (5)                |
| 20-39                                        | 28,982  | 167,571          | 0.2 (41)                | 30,631  | 188,380          | 0.3 (58)                |
| 40-49                                        | 18,740  | 106,337          | 0.5 (53)                | 20,191  | 117,986          | 1.0 (119)               |
| 50-59                                        | 16,745  | 93,377           | 1.1 (99)                | 18,194  | 101,448          | 6.2 (628)               |
| 60-69                                        | 11,326  | 60,849           | 2.4 (144)               | 11,750  | 61,299           | 16.1 (987)              |
| 70-79                                        | 7,280   | 37,236           | 5.5 (206)               | 7,330   | 34,844           | 29.7 (1,034)            |
| ≥ 80                                         | 3,825   | 18,929           | 10.5 (198)              | 4,818   | 23,172           | 47.8 (1,107)            |
| <b>Chronic kidney disease</b>                |         |                  |                         |         |                  |                         |
| 0-19                                         | 19,007  | 143,995          | 0.3 (37)                | 18,200  | 138,410          | 0.2 (33)                |
| 20-39                                        | 28,896  | 166,662          | 0.8 (138)               | 30,555  | 187,402          | 0.9 (173)               |
| 40-49                                        | 18,626  | 105,218          | 1.9 (200)               | 20,119  | 117,418          | 1.4 (170)               |
| 50-59                                        | 16,546  | 91,726           | 4.2 (386)               | 18,264  | 102,861          | 3.1 (317)               |
| 60-69                                        | 11,049  | 58,474           | 10.1 (589)              | 12,300  | 66,388           | 6.8 (452)               |
| 70-79                                        | 6,896   | 34,352           | 22.4 (768)              | 8,330   | 42,336           | 15.0 (634)              |
| ≥ 80                                         | 3,462   | 16,119           | 52.2 (842)              | 5,916   | 31,586           | 31.6 (999)              |
| <b>Stroke</b>                                |         |                  |                         |         |                  |                         |
| 0-19                                         | 19,044  | 144,494          | 0.1 (11)                | 18,225  | 138,714          | 0.1 (10)                |
| 20-39                                        | 28,966  | 167,513          | 0.2 (32)                | 30,625  | 188,279          | 0.3 (54)                |
| 40-49                                        | 18,723  | 106,112          | 0.9 (98)                | 20,195  | 118,033          | 0.9 (101)               |
| 50-59                                        | 16,663  | 92,757           | 2.3 (215)               | 18,316  | 103,296          | 1.9 (200)               |
| 60-69                                        | 11,095  | 58,984           | 7.1 (420)               | 12,326  | 66,626           | 5.3 (352)               |
| 70-79                                        | 6,787   | 33,726           | 18.1 (609)              | 8,155   | 41,474           | 12.9 (536)              |
| ≥ 80                                         | 3,302   | 16,079           | 26.9 (432)              | 5,578   | 29,934           | 24.5 (734)              |
| <b>Congestive heart failure</b>              |         |                  |                         |         |                  |                         |
| 0-19                                         | 19,049  | 144,577          | <0.1 (3)                | 18,225  | 138,741          | <0.1 (1)                |
| 20-39                                        | 28,991  | 167,636          | 0.1 (23)                | 30,643  | 188,550          | 0.1 (27)                |
| 40-49                                        | 18,748  | 106,429          | 0.6 (60)                | 20,247  | 118,489          | 0.4 (44)                |
| 50-59                                        | 16,715  | 93,129           | 2.0 (189)               | 18,420  | 104,263          | 1.1 (113)               |
| 60-69                                        | 11,200  | 60,021           | 4.7 (284)               | 12,468  | 67,862           | 3.4 (228)               |
| 70-79                                        | 7,023   | 35,739           | 14.7 (524)              | 8,373   | 43,018           | 10.7 (462)              |
| ≥ 80                                         | 3,454   | 16,474           | 44.4 (732)              | 5,644   | 30,042           | 39.2 (1,178)            |

**Supplementary table C.** Incidence of twenty chronic conditions considered individually (continued 3)

| Condition<br>age (years)            | Men     |                  |                         | Women   |                  |                         |
|-------------------------------------|---------|------------------|-------------------------|---------|------------------|-------------------------|
|                                     | Persons | Person-<br>years | Incidence<br>rate * (n) | Persons | Person-<br>years | Incidence<br>rate * (n) |
| <b>Dementia</b>                     |         |                  |                         |         |                  |                         |
| 0-19                                | 19,045  | 144,233          | 0.7 (95)                | 18,224  | 138,612          | 0.5 (65)                |
| 20-39                               | 28,927  | 167,098          | 0.5 (90)                | 30,613  | 188,229          | 0.4 (74)                |
| 40-49                               | 18,730  | 106,234          | 0.8 (87)                | 20,234  | 118,263          | 0.7 (80)                |
| 50-59                               | 16,732  | 93,398           | 1.2 (113)               | 18,391  | 104,060          | 1.2 (122)               |
| 60-69                               | 11,339  | 61,016           | 2.4 (147)               | 12,527  | 68,389           | 2.2 (152)               |
| 70-79                               | 7,250   | 37,024           | 11.5 (424)              | 8,523   | 44,015           | 9.0 (394)               |
| ≥ 80                                | 3,651   | 17,816           | 37.4 (666)              | 5,684   | 30,237           | 43.8 (1,324)            |
| <b>Schizophrenia</b>                |         |                  |                         |         |                  |                         |
| 0-19                                | 19,043  | 144,539          | 0.2 (32)                | 18,221  | 138,684          | 0.2 (28)                |
| 20-39                               | 28,905  | 166,386          | 1.1 (177)               | 30,559  | 187,680          | 0.6 (116)               |
| 40-49                               | 18,656  | 105,803          | 0.6 (68)                | 20,132  | 117,772          | 0.5 (53)                |
| 50-59                               | 16,695  | 93,305           | 0.5 (49)                | 18,333  | 103,725          | 0.6 (67)                |
| 60-69                               | 11,357  | 61,286           | 1.0 (59)                | 12,474  | 68,212           | 0.9 (61)                |
| 70-79                               | 7,338   | 38,011           | 2.4 (92)                | 8,586   | 44,755           | 2.7 (121)               |
| ≥ 80                                | 3,892   | 19,550           | 11.3 (221)              | 6,114   | 34,000           | 13.1 (444)              |
| <b>Hepatitis</b>                    |         |                  |                         |         |                  |                         |
| 0-19                                | 19,041  | 144,470          | 0.1 (17)                | 18,216  | 138,646          | 0.1 (20)                |
| 20-39                               | 28,927  | 166,978          | 0.7 (118)               | 30,557  | 187,564          | 0.6 (114)               |
| 40-49                               | 18,620  | 105,303          | 1.3 (136)               | 20,126  | 117,719          | 0.6 (76)                |
| 50-59                               | 16,599  | 92,627           | 1.1 (105)               | 18,340  | 103,834          | 0.6 (58)                |
| 60-69                               | 11,293  | 61,018           | 0.8 (48)                | 12,506  | 68,411           | 0.9 (62)                |
| 70-79                               | 7,353   | 38,053           | 0.6 (24)                | 8,634   | 45,080           | 0.6 (25)                |
| ≥ 80                                | 3,936   | 20,045           | 0.4 (9)                 | 6,350   | 35,622           | 0.3 (12)                |
| <b>Autism spectrum disorder</b>     |         |                  |                         |         |                  |                         |
| 0-19                                | 19,031  | 144,197          | 0.3 (37)                | 18,224  | 138,664          | 0.1 (16)                |
| 20-39                               | 28,972  | 167,636          | <0.1 (6)                | 30,643  | 188,651          | <0.1 (2)                |
| 40-49                               | 18,778  | 106,682          | <0.1 (3)                | 20,275  | 118,760          | 0.0 (0)                 |
| 50-59                               | 16,810  | 94,079           | 0.0 (0)                 | 18,480  | 104,783          | 0.0 (0)                 |
| 60-69                               | 11,424  | 61,702           | 0.0 (0)                 | 12,603  | 69,065           | 0.0 (0)                 |
| 70-79                               | 7,409   | 38,416           | 0.0 (0)                 | 8,704   | 45,493           | 0.0 (0)                 |
| ≥ 80                                | 3,966   | 20,174           | 0.0 (0)                 | 6,383   | 35,849           | 0.0 (0)                 |
| <b>Human immunodeficiency virus</b> |         |                  |                         |         |                  |                         |
| 0-19                                | 19,049  | 144,591          | <0.1 (1)                | 18,227  | 138,772          | <0.1 (1)                |
| 20-39                               | 28,985  | 167,674          | 0.1 (20)                | 30,646  | 188,628          | 0.1 (11)                |
| 40-49                               | 18,756  | 106,511          | 0.1 (13)                | 20,265  | 118,694          | <0.1 (2)                |
| 50-59                               | 16,794  | 94,006           | <0.1 (3)                | 18,476  | 104,777          | 0.0 (0)                 |
| 60-69                               | 11,420  | 61,680           | <0.1 (1)                | 12,603  | 69,065           | 0.0 (0)                 |
| 70-79                               | 7,408   | 38,407           | <0.1 (1)                | 8,704   | 45,489           | <0.1 (1)                |
| ≥ 80                                | 3,964   | 20,171           | 0.0 (0)                 | 6,383   | 35,849           | 0.0 (0)                 |

\* Incidence rates are reported per 1,000 person-years, and are calculated by dividing the number of observed new cases in parentheses by the number of observed person-years of risk within each age and sex stratum. The 20 chronic conditions are listed in decreasing order of frequency (by overall age- and sex-standardized prevalence). (Rocca et., al. 2013)

STROBE 2007 (v4) Statement—Checklist of items that should be included in reports of *cohort studies*

| Section/Topic                | Item # | Recommendation                                                                                                                                                                       | Reported on page # |
|------------------------------|--------|--------------------------------------------------------------------------------------------------------------------------------------------------------------------------------------|--------------------|
| Title and abstract           | 1      | (a) Indicate the study's design with a commonly used term in the title or the abstract                                                                                               | 1,3                |
|                              |        | (b) Provide in the abstract an informative and balanced summary of what was done and what was found                                                                                  | 3-4                |
| <b>Introduction</b>          |        |                                                                                                                                                                                      |                    |
| Background/rationale         | 2      | Explain the scientific background and rationale for the investigation being reported                                                                                                 | 6-7                |
| Objectives                   | 3      | State specific objectives, including any prespecified hypotheses                                                                                                                     | 7                  |
| <b>Methods</b>               |        |                                                                                                                                                                                      |                    |
| Study design                 | 4      | Present key elements of study design early in the paper                                                                                                                              | 7-10               |
| Setting                      | 5      | Describe the setting, locations, and relevant dates, including periods of recruitment, exposure, follow-up, and data collection                                                      | 7-8                |
| Participants                 | 6      | (a) Give the eligibility criteria, and the sources and methods of selection of participants. Describe methods of follow-up                                                           | 8                  |
|                              |        | (b) For matched studies, give matching criteria and number of exposed and unexposed                                                                                                  | Not applicable     |
| Variables                    | 7      | Clearly define all outcomes, exposures, predictors, potential confounders, and effect modifiers. Give diagnostic criteria, if applicable                                             | 8-9                |
| Data sources/<br>measurement | 8*     | For each variable of interest, give sources of data and details of methods of assessment (measurement). Describe comparability of assessment methods if there is more than one group | 8-9                |
| Bias                         | 9      | Describe any efforts to address potential sources of bias                                                                                                                            | 14-17              |
| Study size                   | 10     | Explain how the study size was arrived at                                                                                                                                            | 10                 |
| Quantitative variables       | 11     | Explain how quantitative variables were handled in the analyses. If applicable, describe which groupings were chosen and why                                                         | 9                  |
| Statistical methods          | 12     | (a) Describe all statistical methods, including those used to control for confounding                                                                                                | 9-10               |
|                              |        | (b) Describe any methods used to examine subgroups and interactions                                                                                                                  | 9-10               |
|                              |        | (c) Explain how missing data were addressed                                                                                                                                          | 9                  |
|                              |        | (d) If applicable, explain how loss to follow-up was addressed                                                                                                                       | 8-9, 16            |
|                              |        | (e) Describe any sensitivity analyses                                                                                                                                                | 10                 |
| <b>Results</b>               |        |                                                                                                                                                                                      |                    |

|                          |     |                                                                                                                                                                                                              |                                    |
|--------------------------|-----|--------------------------------------------------------------------------------------------------------------------------------------------------------------------------------------------------------------|------------------------------------|
| Participants             | 13* | (a) Report numbers of individuals at each stage of study—eg numbers potentially eligible, examined for eligibility, confirmed eligible, included in the study, completing follow-up, and analysed            | 10                                 |
|                          |     | (b) Give reasons for non-participation at each stage                                                                                                                                                         | 10                                 |
|                          |     | (c) Consider use of a flow diagram                                                                                                                                                                           | Not applicable                     |
| Descriptive data         | 14* | (a) Give characteristics of study participants (eg demographic, clinical, social) and information on exposures and potential confounders                                                                     | 10, Tables 1 and 2                 |
|                          |     | (b) Indicate number of participants with missing data for each variable of interest                                                                                                                          | 9                                  |
|                          |     | (c) Summarise follow-up time (eg, average and total amount)                                                                                                                                                  | 10                                 |
| Outcome data             | 15* | Report numbers of outcome events or summary measures over time                                                                                                                                               | 10-13, Tables 1-3, Figures 1 and 2 |
| Main results             | 16  | (a) Give unadjusted estimates and, if applicable, confounder-adjusted estimates and their precision (eg, 95% confidence interval). Make clear which confounders were adjusted for and why they were included | Not applicable                     |
|                          |     | (b) Report category boundaries when continuous variables were categorized                                                                                                                                    | Tables 1-3, Figures 1 and 2        |
|                          |     | (c) If relevant, consider translating estimates of relative risk into absolute risk for a meaningful time period                                                                                             | Not applicable                     |
| Other analyses           | 17  | Report other analyses done—eg analyses of subgroups and interactions, and sensitivity analyses                                                                                                               | 10-13                              |
| <b>Discussion</b>        |     |                                                                                                                                                                                                              |                                    |
| Key results              | 18  | Summarise key results with reference to study objectives                                                                                                                                                     | 13-14                              |
| <b>Limitations</b>       |     |                                                                                                                                                                                                              |                                    |
| Interpretation           | 20  | Give a cautious overall interpretation of results considering objectives, limitations, multiplicity of analyses, results from similar studies, and other relevant evidence                                   | 14-21                              |
| Generalisability         | 21  | Discuss the generalisability (external validity) of the study results                                                                                                                                        | 17                                 |
| <b>Other information</b> |     |                                                                                                                                                                                                              |                                    |
| Funding                  | 22  | Give the source of funding and the role of the funders for the present study and, if applicable, for the original study on which the present article is based                                                | 23                                 |

\*Give information separately for cases and controls in case-control studies and, if applicable, for exposed and unexposed groups in cohort and cross-sectional studies.

**Note:** An Explanation and Elaboration article discusses each checklist item and gives methodological background and published examples of transparent reporting. The STROBE checklist is best used in conjunction with this article (freely available on the Web sites of PLoS Medicine at <http://www.plosmedicine.org/>, Annals of Internal Medicine at <http://www.annals.org/>, and Epidemiology at <http://www.epidem.com/>). Information on the STROBE Initiative is available at [www.strobe-statement.org](http://www.strobe-statement.org).



# BMJ Open

## Risk of developing multimorbidity across all ages in an historical cohort study: differences by sex and ethnicity

|                                 |                                                                                                                                                                                                                                                                                                                                                                                                                                                                                                                                                                                                                                                                                                                                                                                                                          |
|---------------------------------|--------------------------------------------------------------------------------------------------------------------------------------------------------------------------------------------------------------------------------------------------------------------------------------------------------------------------------------------------------------------------------------------------------------------------------------------------------------------------------------------------------------------------------------------------------------------------------------------------------------------------------------------------------------------------------------------------------------------------------------------------------------------------------------------------------------------------|
| Journal:                        | <i>BMJ Open</i>                                                                                                                                                                                                                                                                                                                                                                                                                                                                                                                                                                                                                                                                                                                                                                                                          |
| Manuscript ID:                  | bmjopen-2014-006413.R1                                                                                                                                                                                                                                                                                                                                                                                                                                                                                                                                                                                                                                                                                                                                                                                                   |
| Article Type:                   | Research                                                                                                                                                                                                                                                                                                                                                                                                                                                                                                                                                                                                                                                                                                                                                                                                                 |
| Date Submitted by the Author:   | 19-Dec-2014                                                                                                                                                                                                                                                                                                                                                                                                                                                                                                                                                                                                                                                                                                                                                                                                              |
| Complete List of Authors:       | St Sauver, Jennifer; Mayo Clinic, Health Sciences Research<br>Boyd, Cynthia; Johns Hopkins University, Geriatric Medicine and Gerontology<br>Grossardt, Brandon; Mayo Clinic, Biomedical Statistics and Informatics<br>Bobo, William; Mayo Clinic, Department of Psychiatry<br>Finney Rutten, Lila; Mayo Clinic, The Robert D. and Patricia E. Kern Center for the Science of Health Care Delivery<br>Roger, Verinique; Mayo Clinic, The Robert D. and Patricia E. Kern Center for the Science of Health Care Delivery<br>Ebbert, John; Mayo Clinic, The Robert D. and Patricia E. Kern Center for the Science of Health Care Delivery<br>Therneau, Terry; Mayo Clinic, Biomedical Statistics and Informatics<br>Yawn, Barbara; Olmsted Medical Center, Research<br>Rocca, Walter; Mayo Clinic, Health Sciences Research |
| <b>Primary Subject Heading</b>: | Epidemiology                                                                                                                                                                                                                                                                                                                                                                                                                                                                                                                                                                                                                                                                                                                                                                                                             |
| Secondary Subject Heading:      | Cardiovascular medicine, Health services research, Public health                                                                                                                                                                                                                                                                                                                                                                                                                                                                                                                                                                                                                                                                                                                                                         |
| Keywords:                       | EPIDEMIOLOGY, Cardiac Epidemiology < CARDIOLOGY, GENERAL MEDICINE (see Internal Medicine), GERIATRIC MEDICINE, PREVENTIVE MEDICINE, PRIMARY CARE                                                                                                                                                                                                                                                                                                                                                                                                                                                                                                                                                                                                                                                                         |
|                                 |                                                                                                                                                                                                                                                                                                                                                                                                                                                                                                                                                                                                                                                                                                                                                                                                                          |

SCHOLARONE™  
Manuscripts

1  
2  
3  
4 1 Risk of developing multimorbidity across all ages in an historical  
5  
6  
7 2 cohort study: differences by sex and ethnicity  
8

9  
10 3 Jennifer L. St. Sauver *associate professor*<sup>1 2</sup>, Cynthia M. Boyd *associate professor*<sup>3</sup>,  
11  
12 4 Brandon R. Grossardt *biostatistician*<sup>4</sup>, William V. Bobo *assistant professor*<sup>5</sup>, Lila J.  
13  
14 5 Finney Rutten *associate professor*<sup>1 2</sup>, Véronique L. Roger *professor*<sup>1 2 6</sup>, Jon O. Ebbert  
15  
16 6 *professor*<sup>2</sup>, Terry M. Therneau *professor*<sup>4</sup>, Barbara P. Yawn *director of research*<sup>1 7</sup>,  
17  
18 7 Walter A. Rocca *professor*<sup>1 8</sup>  
19  
20

21  
22 8 Author Affiliations: <sup>1</sup> Division of Epidemiology, Department of Health Sciences  
23  
24 9 Research, College of Medicine, Mayo Clinic, 200 First Street SW, Rochester, MN  
25  
26  
27 10 55905, USA; <sup>2</sup> The Robert D. and Patricia E. Kern Center for the Science of Health  
28  
29 11 Care Delivery, College of Medicine, Mayo Clinic, 200 First Street SW, Rochester, MN  
30  
31 12 55905, USA; <sup>3</sup> Division of Geriatric Medicine and Gerontology, School of Medicine,  
32  
33 13 Johns Hopkins University, 600 North Wolfe Street, Baltimore, MD 21287, USA; <sup>4</sup>  
34  
35 14 Division of Biomedical Statistics and Informatics, Department of Health Sciences  
36  
37 15 Research, College of Medicine, Mayo Clinic, 200 First Street SW, Rochester, MN  
38  
39 16 55905, USA; <sup>5</sup> Department of Psychiatry and Psychology, College of Medicine, Mayo  
40  
41 17 Clinic, 200 First Street SW, Rochester, MN 55905, USA; <sup>6</sup> Division of Cardiovascular  
42  
43 18 Diseases, Department of Internal Medicine, College of Medicine, Mayo Clinic, 200 First  
44  
45 19 Street SW, Rochester, MN 55905, USA; <sup>7</sup> Department of Research, Olmsted Medical  
46  
47 20 Center, 210 Ninth Street SE, Rochester, MN 55904, USA; <sup>8</sup> Department of Neurology,  
48  
49 21 College of Medicine, Mayo Clinic, 200 First Street SW, Rochester, MN 55905, USA  
50  
51  
52  
53  
54

55  
56 22 Word Count: (4,427/approximately 4,000)  
57  
58  
59  
60

1  
2  
3 23 Abstract: (291/300)  
4

5  
6 24 Strengths and limitations of this study: 219  
7

8 25 References: 38  
9

10 26 Figures/Tables: (5/5)  
11

12 27 Supplementary Tables: 3  
13  
14  
15  
16  
17  
18

19 29 Corresponding Author: Walter A. Rocca, MD, MPH, Division of Epidemiology,  
20  
21 30 Department of Health Sciences Research, Mayo Clinic, 200 First Street SW, Rochester,  
22  
23 31 MN 55905 (telephone: 507-284-3568; fax: 507-284-1516; e-mail: [rocca@mayo.edu](mailto:rocca@mayo.edu)).  
24  
25  
26  
27  
28

29  
30 33 Extra material supplied by the author: Supplementary tables A-C  
31  
32  
33  
34

1  
2  
3  
4 35 **ABSTRACT**

5  
6 36 Objective: To study the incidence of de novo multimorbidity across all ages in a  
7  
8  
9 37 geographically defined population with an emphasis on sex and ethnic differences.

10  
11 38  
12  
13 39 Design: Historical cohort study.  
14  
15  
16 40

17  
18 41 Setting: All persons residing in Olmsted County, Minnesota, USA on January 1, 2000  
19  
20 42 who had not refused permission for their records to be used for research (n = 123,716).  
21  
22  
23 43

24  
25 44 Participants: We used the Rochester Epidemiology Project medical records-linkage  
26  
27 45 system to identify all of the county residents. We identified and removed from the  
28  
29 46 cohort all persons who had developed multimorbidity before January 1, 2000 (baseline  
30  
31 47 date), and we followed the cohort over 14 years (January 1, 2000 through December  
32  
33 48 31, 2013).  
34  
35  
36 49

37  
38  
39 50 Main outcome measures: Incident multimorbidity was defined as the development of  
40  
41 51 the second of 2 conditions (dyads) from among the 20 chronic conditions selected by  
42  
43 52 the United States Department of Health and Human Services. We also studied the  
44  
45 53 incidence of the third of 3 conditions (triads) from among the 20 chronic conditions.  
46  
47  
48 54

49  
50  
51 55 Results: The incidence of multimorbidity increased steeply with older age; however, the  
52  
53 56 number of people with incident multimorbidity was substantially greater in people  
54  
55 57 younger than 65 years compared to people age 65 years or older (28,378 vs. 6,214).  
56  
57  
58  
59  
60

1  
2  
3 58 The overall risk was similar in men and women; however, the combinations of  
4  
5  
6 59 conditions (dyads and triads) differed extensively by age and by sex. Compared to  
7  
8 60 Whites, the incidence of multimorbidity was higher in Blacks and lower in Asians.  
9  
10  
11 61

12  
13 62 Conclusions: The risk of developing de novo multimorbidity increases steeply with older  
14  
15 63 age, varies by ethnicity, and is similar in men and women overall. However, as  
16  
17 64 expected, the combinations of conditions vary extensively by age and sex. These data  
18  
19 65 represent an important first step toward identifying the causes and the consequences of  
20  
21 66 multimorbidity.  
22  
23  
24  
25 67

1  
2  
3  
4 68 **ARTICLE SUMMARY:** Strengths and limitations of this study

5  
6 69 ■ This is one of the first studies worldwide focusing on the incidence of  
7  
8 70 multimorbidity rather than on the prevalence of multimorbidity. Prevalence  
9  
10 71 reflects both the effect of incidence and of survival after the onset of  
11  
12 72 multimorbidity. We used a simple definition of incident multimorbidity that can be  
13  
14 73 replicated in other populations.  
15  
16

17  
18 74 ■ This study covered an entire geographically defined population, and used a  
19  
20 75 unique records-linkage system. Persons were followed historically over 14  
21  
22 76 years. None of the data were derived from self-report or interviews.  
23  
24

25 77 ■ Studies of multimorbidity require the definition of the number of conditions  
26  
27 78 considered, of the time window of occurrence, and of the source of data (medical  
28  
29 79 records vs. interview). We used the 20 conditions recommended by the United  
30  
31 80 States Department of Health and Human Services. These 20 conditions  
32  
33 81 represent a first consensus list; however, not all of the conditions have the same  
34  
35 82 impact on the complexity of care or on the quality of life of patients.  
36  
37

38  
39 83 ■ Potential limitations of this study include the uncertain validity of diagnostic  
40  
41 84 codes, the possible incompleteness of information due to in or out migration, and  
42  
43 85 the inability to generalize our findings to other populations with different  
44  
45 86 demographic or social characteristics.  
46  
47

48  
49 87 ■ Replication of this study in other populations in the United States and worldwide  
50  
51 88 will allow for useful comparisons.  
52  
53

54 89

## 90 INTRODUCTION

91 The demographic expansion of the elderly population and the improvements in survival  
92 of people affected by chronic conditions have caused a dramatic rise in the number of  
93 people living with multimorbidity ( $\geq 2$  chronic conditions). In the United States, the  
94 prevalence of multimorbidity among Medicare recipients increases from 62% at age 65 -  
95 74 years to 82% at ages 85 years and older.<sup>1</sup> The monetary costs associated with  
96 managing patients with multiple chronic conditions are overwhelming.<sup>2-4</sup> In addition,  
97 fragmented health care in patients with multimorbidity causes a particularly high risk for  
98 complications and a lower quality of life.<sup>5,6</sup>

99 Several studies have described the prevalence of multimorbidity in a wide range  
100 of populations.<sup>1,7-12</sup> Additional studies have focused on how to manage patients with  
101 multiple chronic conditions.<sup>13,14</sup> However, in 2010 the United States Department of  
102 Health and Human Services (US-DHHS) highlighted the critical need to identify groups  
103 of individuals at higher risk of developing multimorbidity (first appearance of  
104 multimorbidity). Such studies of incident multimorbidity are essential to identify patterns  
105 of disease accumulation, and to identify the populations at high risk of developing  
106 multimorbidity. For example, multimorbidity is highly prevalent in the elderly; however,  
107 many of the processes that lead to multimorbidity begin at much earlier ages.  
108 Therefore, data on the ages at which multimorbidity begins and on the patterns of  
109 accumulation of conditions over time are urgently needed to develop focused  
110 interventions to prevent multimorbidities and their adverse health outcomes.<sup>15</sup>

111 Unfortunately, there are currently no population-based data on the incidence of  
112 multimorbidity in the United States across all ages, even though multimorbidity is a high

1  
2  
3 113 public health priority for the nation.<sup>15</sup> The Rochester Epidemiology Project (REP)  
4  
5 114 medical records-linkage system captures long-term medical information on a stable  
6  
7  
8 115 population, and is therefore uniquely positioned to study the incidence of multimorbidity.  
9  
10 116 In a previous paper, we described in detail the patterns of prevalent multimorbidity in  
11  
12 117 this population.<sup>16</sup> In this study, we further leveraged this data resource to examine the  
13  
14 118 incidence of multimorbidity across all ages, separately in men and women, and in three  
15  
16  
17 119 ethnic groups.<sup>17</sup>  
18  
19  
20 120

## 21 22 121 METHODS

### 23 24 25 122 Study population

26  
27  
28 123 The REP has tracked and linked health care information for the population of Olmsted  
29  
30 124 County, MN, since 1966.<sup>17-19</sup> The vast majority of medical care in this community is  
31  
32 125 currently provided by a few health care institutions: Olmsted Medical Center and its  
33  
34 126 affiliated hospital, Mayo Clinic and its two affiliated hospitals, the Rochester Family  
35  
36 127 Medicine Clinic, and a few smaller care facilities. The health care records from these  
37  
38 128 institutions are linked together through the REP records-linkage system.<sup>17-19</sup> Persons  
39  
40 129 are considered residents of Olmsted County at the time of each health care visit based  
41  
42 130 on their address. Over the years, this address information has been accumulated and  
43  
44 131 is used to define who resided in Olmsted County at any given point in time since 1966  
45  
46 132 (REP Census). The population counts obtained by the REP Census are similar to those  
47  
48 133 obtained by the US Census, indicating that virtually the entire population of the county is  
49  
50 134 captured by the system.<sup>18-20</sup> We used the REP Census to identify all individuals who  
51  
52  
53  
54 135 resided in Olmsted County on January 1, 2000 (baseline date); however, we included  
55  
56  
57  
58  
59  
60



1  
2  
3 136 only individuals who had not refused permission to use their medical records for  
4  
5  
6 137 research (Minnesota research authorization).<sup>18,21,22</sup>  
7  
8  
9 138

## 10 139 Definition of incident multimorbidity

11  
12  
13 140 We focused on 20 selected chronic conditions recommended by the US-DHHS for  
14  
15 141 studying multimorbidity.<sup>23,24</sup> The list of the 20 conditions and the corresponding ICD-9  
16  
17 142 codes used in this study are provided in Supplementary Table A.<sup>23,24</sup> We first identified  
18  
19 143 all ICD-9 codes associated with these 20 chronic conditions that occurred in the  
20  
21 144 population between January 1, 1995 and December 31, 1999 (5 years before the  
22  
23 145 baseline date, January 1, 2000). Persons who did not have any ICD-9 code for a given  
24  
25 146 condition were assumed to not have the condition of interest. By contrast, residents  
26  
27 147 were defined as having a chronic condition if they had at least two ICD-9 codes for that  
28  
29 148 condition separated by more than 30 days, and the incidence date was assigned at the  
30  
31 149 time they received a second diagnostic code.  
32  
33  
34  
35

36  
37 150 Persons who had 2 or more of the 20 conditions at baseline were considered to  
38  
39 151 have prevalent multimorbidity and were therefore excluded from incidence analyses of 2  
40  
41 152 chronic conditions (dyads). Similarly, persons who had 3 or more of the 20 conditions  
42  
43 153 at baseline were excluded from incidence analyses of 3 chronic conditions (triads). All  
44  
45 154 persons in this fixed population cohort were followed historically through the REP  
46  
47 155 records-linkage system for approximately 14 years to study the emergence of new  
48  
49 156 conditions.  
50  
51  
52  
53  
54 157

## 55 158 Statistical Analyses

1  
2  
3 159 All persons in the cohort were followed from January 1, 2000 through the last contact  
4  
5  
6 160 with the records-linkage system (the earliest of death date, last medical visit date, or  
7  
8 161 December 31, 2013). The incidence of each of the 20 chronic conditions was  
9  
10 162 calculated among persons free of that condition at baseline. Persons contributed  
11  
12 163 person-years to the denominator for the incidence of 2 conditions (development of a  
13  
14 164 second condition in a dyad) only during the time when they had 0 or 1 chronic  
15  
16 165 conditions, whereas persons contributed person-years to the denominator for the  
17  
18 166 incidence of 3 chronic conditions (development of a third condition in a triad) only when  
19  
20 167 they had 0, 1, or 2 chronic conditions. Although the majority of people accumulated  
21  
22 168 conditions one-at-a-time, some subjects jumped from 0 to 2 conditions, or from 1 to 3,  
23  
24 169 or even from 0 to 3 conditions. For example, a person previously considered free of all  
25  
26 170 of the 20 conditions who was diagnosed with hyperlipidemia, hypertension, and  
27  
28 171 depression during one visit was counted as having three incident dyads and one  
29  
30 172 incident triad on the same date.  
31  
32  
33  
34  
35

36 173 Incidence rates were reported separately by age (using seven age strata or  
37  
38 174 splitting the entire population in 0-64 and  $\geq 65$  years), sex, and ethnicity, and were  
39  
40 175 directly standardized by age and sex to the total US 2010 Decennial Census after  
41  
42 176 removing projected prevalence (see Supplementary Table B). Because the study  
43  
44 177 covered the target population completely, and no sampling was involved, confidence  
45  
46 178 intervals were not included in the tables.<sup>25,26</sup> Ethnicity data were not available for 9,176  
47  
48 179 people (7.4% of the cohort). These individuals were included in the overall and age-  
49  
50 180 and sex-specific analyses, but not in the ethnicity-specific analyses.  
51  
52  
53  
54  
55  
56  
57  
58  
59  
60

1  
2  
3 181 Although the 20 conditions proposed by the US-DHHS represent a national  
4  
5 182 consensus,<sup>15</sup> some of the conditions may have a different prognostic impact than  
6  
7  
8 183 others. For example, hyperlipidemia and hypertension often occur together and tend to  
9  
10 184 remain asymptomatic. Therefore, we performed a set of sensitivity analyses combining  
11  
12 185 hyperlipidemia and hypertension as a single chronic condition. The date of incidence  
13  
14 186 for the single chronic condition of hyperlipidemia and/or hypertension was defined as  
15  
16 187 the date the person first met criteria for either of these conditions.  
17  
18  
19  
20 188

## 21 22 189 RESULTS

### 23 24 25 190 Description of the Olmsted County population

26  
27  
28 191 The REP Census identified 129,311 Olmsted County, MN residents on January 1, 2000  
29  
30 192 compared with 124,277 individuals counted by the 2000 US Census (104.1%); 123,716  
31  
32 193 persons provided Minnesota research authorization for medical record research (95.7%)  
33  
34 194 and were included in our analyses. A total of 17,655 people (14.3%) had 2 or more  
35  
36 195 conditions at the baseline date and 9,368 (7.6%) had 3 or more conditions (prevalent  
37  
38 196 multimorbidity). Overall, we observed a total of 1,334,906 person-years of follow-up;  
39  
40 197 however, as expected, the length of follow-up varied by age group. For example,  
41  
42 198 median follow-up was 13.1 years in persons aged 0 to 19 years at baseline, 12.3 years  
43  
44 199 in persons aged 70 to 79 years at baseline, and 4.9 years in persons aged 80 years or  
45  
46 200 older at baseline.  
47  
48  
49  
50

51  
52 201 Figure 1 and Supplementary Table C report the incidence of each of the 20  
53  
54 202 chronic conditions considered separately by age and sex. The incidence of most of the  
55  
56 203 chronic conditions increased steeply with older age. However, the incidence of asthma,  
57  
58  
59  
60

1  
2  
3 204 substance abuse disorders, hepatitis, autism spectrum disorder, and infection with  
4  
5 205 human immunodeficiency virus was higher in the younger population compared to  
6  
7  
8 206 persons older than 60 years. The incidence of depression increased from ages 0-19 to  
9  
10 207 20-39 years, declined from 40-49 to 60-69 years, and increased sharply again  
11  
12 208 thereafter. The incidence of most conditions was higher in men compared to women of  
13  
14 209 the same age; however, women had a higher incidence of depression, arthritis, asthma,  
15  
16 210 and osteoporosis. The incidence curves in men and women crossed at age 50-59  
17  
18 211 years for cancer and at age 60-69 years for chronic obstructive pulmonary disease  
19  
20 212 (Figure 1).  
21  
22  
23  
24  
25  
26

## 27 214 Incidence of multimorbidity by age, sex, and ethnicity

28  
29  
30 215 Figure 2 shows the age-specific incidence rates of multimorbidity in men and women  
31  
32 216 separately (panels A and C), and in three ethnic groups (panels B and D). Both the  
33  
34 217 incidence of 2 chronic conditions and the incidence of 3 chronic conditions increased  
35  
36 218 steeply with older age (Table 1, Table 2, and Figure 2). For example, the incidence of 2  
37  
38 219 chronic conditions in men was 6.5/1,000 person-years in persons who were ages 0-19  
39  
40 220 years, and 260.0/1,000 in persons who were  $\geq 80$  years. The overall incidence of 2  
41  
42 221 chronic conditions was slightly higher in women compared to men (overall standardized  
43  
44 222 incidence rates 38.8 vs. 35.5/1,000 person-years; Table 1). The incidence of 2 chronic  
45  
46 223 conditions was higher in Blacks compared to Whites, but lower in Asians compared to  
47  
48 224 Whites (see standardized incidence rates in Table 1 and Figure 2). We observed  
49  
50 225 similar patterns for the development of 3 chronic conditions (see standardized incidence  
51  
52 226 rates in Table 2 and Figure 2). The overall incidence of 3 conditions was similar in men  
53  
54  
55  
56  
57  
58  
59  
60

1  
2  
3 227 and women (standardized incidence rates 25.5/1,000 person-years in men vs.  
4  
5 228 26.6/1,000 person-years in women); however, it was higher in Blacks and lower in  
6  
7  
8 229 Asians, compared to Whites (Figure 2).  
9

10 230 In the set of sensitivity analyses in which we combined hyperlipidemia and  
11  
12 231 hypertension as a single condition, we observed a slight decrease in the incidence of 2  
13  
14 232 chronic conditions and of 3 chronic conditions compared with the primary analyses.  
15  
16 233 The overall incidence rate of 2 conditions decreased from 35.0 to 34.0/1,000 person-  
17  
18 234 years in men and from 40.3 to 40.0/1,000 person-years in women. The incidence rate  
19  
20 235 of 3 conditions decreased from 24.7 to 22.5/1,000 person-years in men and from 28.5 to  
21  
22 236 27.0/1,000 person-years in women (incidence rates non-standardized; data not shown  
23  
24 237 in the Tables). For both 2 and 3 conditions, the decrease in incidence was more  
25  
26 238 sizeable in men than in women.  
27  
28  
29  
30  
31  
32  
33

## 34 240 Incidence of dyads and triads

35  
36  
37 241 Table 3 shows the incidence of the most common dyads or triads of chronic conditions  
38  
39 242 in seven age strata and for men and women separately. As expected, the incidence of  
40  
41 243 dyads and triads varied extensively with age. For example, the most common incident  
42  
43 244 dyad in persons 0-19 years was depression and asthma (1.8/1,000 person-years in  
44  
45 245 boys or men and 2.9/1,000 person-years in girls or women). By comparison, the most  
46  
47 246 common dyad in persons  $\geq 80$  years was hypertension and cancer in men (18.9/1,000  
48  
49 247 person-years) and hypertension and arthritis in women (27.7/1,000 person-years).  
50  
51 248 Similarly, the most common incident triad of conditions in persons aged 0-19 years was  
52  
53 249 depression, asthma, and substance abuse disorders in both sexes. By comparison, the  
54  
55  
56  
57  
58  
59  
60

1  
2  
3 250 most common incident triads in persons  $\geq 80$  years were hypertension, cancer, and  
4  
5  
6 251 arrhythmia in men and hyperlipidemia, hypertension, and arthritis in women.

7  
8 252 As expected, the incidence of dyads and triads also varied by sex. In some  
9  
10 253 instances, the composition of the dyads or triads was the same for men and women, but  
11  
12 254 the magnitude of the incidence rate was different. In other instances, the magnitude of  
13  
14 255 the incidence rate was similar in men and women, but the composition of the dyads and  
15  
16 256 triads varied by sex. For example, the most common incident dyad in persons aged 60-  
17  
18 257 69 years was hyperlipidemia and hypertension in both sexes, but the incidence rate was  
19  
20 258 higher in men compared to women (23.4/1,000 person-years vs. 18.8/1,000 person-  
21  
22 259 years). By contrast, the incidence rates of the most common triads in persons aged 60-  
23  
24 260 69 years were similar in men and women (11.6/1,000 vs. 10.3/1,000 person-years);  
25  
26 261 however, they included different conditions (Table 3).  
27  
28  
29  
30  
31

32 262

## 33 34 263 DISCUSSION

### 35 36 37 264 Statement of the principal findings

38  
39 265 The burden of multimorbidity in the United States is high and is increasing with an aging  
40  
41 266 population and with improvements in survival. We leveraged a unique longitudinal data  
42  
43 267 resource covering an entire, stable, and geographically defined population to examine  
44  
45 268 the incidence of multimorbidity across all ages. The incidence of 2 chronic conditions  
46  
47 269 and the incidence of 3 chronic conditions increased steeply with older age, and the  
48  
49 270 overall risk was similar in men and women. However, the number of people who  
50  
51 271 developed multimorbidity before age 65 was more than four times greater than the  
52  
53 272 number of people who developed multimorbidity after age 65. The incidence of  
54  
55  
56  
57  
58  
59  
60

1  
2  
3 273 multimorbidity was highest in Blacks, and lowest in Asians. Finally, as expected, the  
4  
5 274 combinations of conditions in incident dyads and triads differed extensively by age and  
6  
7  
8 275 by sex. These results have important implications for identifying individuals at higher  
9  
10 276 risk of developing multimorbidity at different ages. These data are also a first step  
11  
12 277 toward understanding the causes and the consequences of multimorbidity.  
13  
14  
15 278

## 17 279 Strengths and limitations

20 280 A unique strength of our study was the ability to measure the incidence of multimorbidity  
21  
22 281 documented in medical records across seven age groups and for an entire,  
23  
24 282 geographically defined population. We used historical data both to exclude individuals  
25  
26 283 with prevalent multimorbidity at baseline and to follow individuals over a long period of  
27  
28 284 time to accurately document the development of incident multimorbidity. In total, our  
29  
30 285 findings reflect 19 years of data accumulation (5 years before and 14 years after the  
31  
32 286 baseline date).  
33  
34  
35

36  
37 287 Unfortunately, there is no standard definition of multimorbidity. Previous studies  
38  
39 288 have included a wide range of chronic conditions and a wide range of time frames. We  
40  
41 289 defined multimorbidity using the 20 conditions selected by US-DHHS which were  
42  
43 290 chosen because they “meet the definition for chronicity, are prevalent [common], and  
44  
45 291 are potentially amenable to public health or clinical interventions or both.”<sup>23</sup> However,  
46  
47 292 this definition provides equal weight to each of the 20 conditions without considering the  
48  
49 293 impact of combinations of specific conditions on the quality of life of patients, the  
50  
51 294 complexity of their joint management, and the severity of their long-term outcomes. In  
52  
53  
54 295 addition, this list does not include a number of conditions that may have a significant  
55  
56  
57  
58  
59  
60

1  
2  
3 296 impact on the burden of multimorbidity in older subjects (e.g., hearing and vision  
4  
5  
6 297 problems). Such conditions should be considered in future studies of multimorbidity.  
7  
8 298 By contrast, the list includes some conditions that were less common in the general  
9  
10 299 population. For example, autism appeared as part of an incident dyad in only 31  
11  
12 300 persons, and HIV infection in only 41 persons. Therefore, further efforts are needed to  
13  
14 301 refine the list of the most relevant conditions to study multimorbidity, recognizing that  
15  
16 302 the most relevant conditions will vary depending on the age and sex of the population.  
17  
18

19  
20 303 Some of the dyads and triads derived by the combination of the 20 conditions  
21  
22 304 selected by the US-DHHS may have a much stronger impact on the complexity of  
23  
24 305 clinical management than others.<sup>27</sup> Therefore, some dyads or triads may be  
25  
26 306 particularly costly for the health system, harder for the patient to manage by  
27  
28 307 themselves, less amenable to a single disease approach to care (e.g., telemonitoring for  
29  
30 308 heart failure), and may have a stronger effect on functionality, severity of symptoms,  
31  
32 309 and risk of death. In addition, social factors (e.g., inadequate insurance, low education)  
33  
34 310 and behavioral factors (e.g., poor diet) not reflected in the list of 20 US-DHHS  
35  
36 311 conditions may be as important, or more important, than the 20 conditions in  
37  
38 312 determining the complexity of clinical management and long-term outcomes.<sup>27</sup>  
39  
40  
41  
42

43 313 For example, because hyperlipidemia and hypertension are typically  
44  
45 314 asymptomatic, and are often diagnosed as the result of routine screening, their  
46  
47 315 combination is likely to have a much lower impact on the life of the patient than the  
48  
49 316 combination of schizophrenia and heart failure. However, both combinations are  
50  
51 317 considered multimorbidity by the US-DHHS definition. Our sensitivity analyses highlight  
52  
53 318 this problem. As expected, when hyperlipidemia and hypertension were considered as  
54  
55  
56  
57  
58  
59  
60



1  
2  
3 319 a single condition, the overall incidence of multimorbidity decreased. The decreases  
4  
5  
6 320 were relatively small but were more sizeable in men than in women. These findings  
7  
8 321 emphasize the importance of reaching consensus on the list of conditions to be used to  
9  
10 322 define multimorbidity. However, it is difficult to assess the utility of the 20 conditions  
11  
12 323 included in the US-DHHS list without also understanding how different combinations of  
13  
14 324 these conditions impact long term outcomes. Therefore, we plan to continue this initial  
15  
16 325 incidence study with further analyses to assess which combinations of conditions have  
17  
18 326 the greatest impact on adverse outcomes, including patient quality of life and complexity  
19  
20 327 of clinical management.<sup>27</sup>

21  
22 328 We defined incident multimorbidity as the date on which a person met the criteria  
23  
24 329 for a second condition or for a third condition. We used an approach similar to that  
25  
26 330 used in the definition for the onset of metabolic syndrome (reaching three of five  
27  
28 331 components of the syndrome).<sup>28,29</sup> This simple operational definition of incident  
29  
30 332 multimorbidity should be easy to replicate, and should facilitate future comparisons with  
31  
32 333 other populations.

33  
34 334 Potential limitations of our study include the inability to validate the ICD-9 codes.  
35  
36 335 It was not possible to confirm all diagnoses for the entire study population, and some  
37  
38 336 ICD-9 codes may have been assigned in error (e.g., “rule out” diagnostic codes). To  
39  
40 337 reduce the likelihood of a single ICD-9 code error, we required two or more diagnosis  
41  
42 338 codes separated by more than 30 days for a person to be defined as having a condition.  
43  
44 339<sup>30</sup> However, if a person received a valid code and was lost to follow-up or died rapidly  
45  
46 340 after diagnosis, we may have underestimated the incidence of some of the conditions.  
47  
48  
49  
50  
51  
52  
53  
54  
55  
56  
57  
58  
59  
60

1  
2  
3 341 In addition, we used diagnosis date as a proxy for the true date of onset of the  
4  
5 342 condition.

6  
7  
8 343 Some individuals may have moved into Olmsted County after having been  
9  
10 344 diagnosed with one or more chronic conditions elsewhere. If those persons continued  
11  
12 345 to receive care within the REP for a number of years, we captured their chronic  
13  
14 346 condition at the time of subsequent health care visits. However, we did not know the  
15  
16 347 true date of onset for the condition, and the sequence of accumulation of conditions  
17  
18 348 could be distorted. Because the population of Olmsted County is stable, particularly  
19  
20 349 among persons who are 40 years of age or older,<sup>19</sup> we do not expect a major distortion  
21  
22 350 of the multimorbidity incidence rates observed in this study due to migration.  
23  
24  
25  
26

27 351 Finally, our study focused on a single geographically defined US population, and  
28  
29 352 the incidence of multimorbidity may differ in other populations. However, the  
30  
31 353 demographic and socioeconomic characteristics of our population are similar to those of  
32  
33 354 the upper Midwest of the United States,<sup>20</sup> and the prevalence of multimorbidity in  
34  
35 355 persons 65 years of age or older was similar in our population compared with the entire  
36  
37 356 US Medicare population.<sup>16</sup> Replication of this study in other populations in the United  
38  
39 357 States and worldwide will allow for useful comparisons.<sup>31</sup>  
40  
41  
42  
43  
44  
45

## 46 359 Comparison with other studies

47  
48  
49 360 A number of studies have described the prevalence of multimorbidity in various  
50  
51 361 populations;<sup>1,7-12</sup> however, few studies have described the incidence of multimorbidity,  
52  
53 362 and no incidence studies are available for the US. In 1998, Van den Akker and  
54  
55 363 colleagues estimated the one year incidence of multimorbidity in patients from a  
56  
57  
58  
59  
60

1  
2  
3 364 network of family practices in the Netherlands.<sup>32</sup> Incident multimorbidity was defined as  
4  
5 365 the new development of at least 2 of 335 diagnostic categories within a one year period.  
6  
7  
8 366 Overall, 7.9% of their population developed one new disease and 1.3% developed two  
9  
10 367 or more new diseases in one year. The proportion of people who developed two or  
11  
12 368 more new conditions increased with older age, but did not differ substantially by sex. It  
13  
14  
15 369 is difficult to compare our results directly to the Dutch findings because of  
16  
17 370 methodological differences (e.g., number of conditions considered and time frame), and  
18  
19  
20 371 because it is not clear whether some of the participants in the Dutch study already had  
21  
22 372 one or more conditions at baseline. However, we observed similar patterns of  
23  
24 373 increasing incidence with older age, and limited differences between men and women in  
25  
26  
27 374 overall incidence.

28  
29 375 More recently, Melis and colleagues assessed the incidence of multimorbidity in  
30  
31 376 Swedish people aged 75 years or older at baseline who participated in a longitudinal  
32  
33 377 cohort study.<sup>33</sup> Incident multimorbidity was defined as the development of at least 2 of  
34  
35  
36 378 39 chronic conditions during three years of follow-up. Participants with none of the 39  
37  
38 379 chronic conditions at baseline had a multimorbidity incidence rate of 12.6 per 100  
39  
40 380 person-years, and patients with one of the 39 conditions at baseline had an incidence  
41  
42 381 rate of 32.9 per 100 person-years. Although we examined fewer conditions than the  
43  
44 382 Swedish group (20 vs. 39), and the ascertainment of incident conditions was different  
45  
46 383 (medical records data vs. survey methods), our incidence rates of multimorbidity in  
47  
48 384 subjects aged 75 years or older were similar (19.1 per 100 person-years in people with  
49  
50 385 no conditions at baseline and 38.9 per 100 person-years in persons with one condition  
51  
52  
53 386 at baseline; both sexes combined; data not shown).

387

388 **Meaning of the study**

389 To understand the importance of these findings, we draw an analogy with the difference  
390 between prevalence and incidence in epidemiologic studies considering one disease at  
391 a time.<sup>34,35</sup> Incidence is the direct measure of the risk of people to develop a given  
392 disease, whereas prevalence is the percent of people affected by the same disease at  
393 one point in time, and reflects both the effect of incidence and the effect of survival after  
394 the onset of the disease.<sup>34,35</sup> Similarly, the prevalence of multimorbidity gives us a  
395 static picture of the population; however, prevalence may be misleading when studying  
396 the mechanisms of multimorbidity. For example, a higher prevalence of multimorbidity  
397 in women than in men may be due to a higher risk of women developing multimorbidity,  
398 or to a longer survival of women affected by multimorbidity.<sup>16</sup> Similarly, studying  
399 outcomes among persons with prevalent multimorbidity may be clinically relevant, but  
400 may not clarify the outcomes of multimorbidity at the population level (e.g., survival bias  
401 and inability to study the effect of the duration of multimorbidity).

402 Prior studies of the prevalence of multimorbidity have shown a dramatic increase  
403 in the number of people living with 2 or more chronic conditions at older ages.<sup>1,7-11</sup>  
404 However, the high prevalence of multimorbidity in the older population implies that  
405 relatively few older individuals remain at risk of developing multimorbidity. Overall,  
406 among persons aged 80 years or older at baseline, only 891 out of 3,710 (24.0%) were  
407 at risk of developing 2 chronic conditions (the other 76.0% already had 2 or more of the  
408 20 conditions). Although the persons who reached 80 years of age or older and

1  
2  
3 409 remained free of multimorbidity were a particularly resilient group, they had a higher risk  
4  
5  
6 410 of developing subsequent multimorbidity than younger persons.  
7

8 411 We also found that the total number of people who developed multimorbidity  
9  
10 412 before age 65 years was more than 4 times greater than the number of people who  
11  
12 413 developed multimorbidity at ages 65 or older (28,378 vs. 6,214). These data emphasize  
14  
15 414 the need to target preventive efforts at much younger ages, but represent only a first  
16  
17 415 step toward future research to identify the social, behavioral, and clinical risk and  
18  
19  
20 416 protective factors for multimorbidity.  
21

22 417 We found important differences in the incidence of multimorbidity by ethnicity.  
23  
24 418 The age standardized incidence rates of multimorbidity were higher in Blacks and lower  
25  
26  
27 419 in Asians compared to Whites. Our findings are consistent with previous studies that  
28  
29 420 showed a higher prevalence of multimorbidity in Blacks compared to Whites, but a lower  
30  
31 421 prevalence of multimorbidity in Asians.<sup>8,16,36-38</sup> Our data suggest that some of these  
32  
33 422 differences in prevalence may be attributed to differences in the incidence of the  
34  
35  
36 423 conditions among different ethnic groups. However, differential survival may also  
37  
38 424 contribute to the differences in prevalence. In turn, both differences in incidence and in  
39  
40 425 prevalence may be influenced by socioeconomic factors, lifestyle behaviors, social  
41  
42  
43 426 environment, and healthcare access. Further research is needed to better characterize  
44  
45  
46 427 these disparities and to identify the causal mechanisms that contribute to different  
47  
48 428 development of chronic conditions and to different survival.  
49

50 429 As expected, the incidence and the composition of the dyads and triads of  
51  
52 430 conditions varied extensively across age and sex strata. For example, women 20 years  
53  
54  
55 431 of age or older were more likely to have depression as a component of their incident  
56  
57  
58  
59  
60

1  
2  
3 432 multimorbidity dyads and triads compared to men. Such differences may lead to  
4  
5  
6 433 different long-term outcomes in men and women. Therefore, these data are useful to  
7  
8 434 understand how multimorbidity develops, and are an important first step toward future  
9  
10 435 research. In particular, such incident data are necessary to study the chronological  
11  
12 436 order of acquisition of multiple chronic conditions in different age, sex, and ethnic strata.  
13  
14  
15 437 Incidence data are also necessary to determine whether the differential order of  
16  
17 438 acquisition is associated with a different risk of adverse long-term outcomes such as  
18  
19 439 hospitalizations, emergency department visits, or death. For example, it is not clear  
20  
21 440 whether acquiring depression prior to arthritis results in worse long-term outcomes  
22  
23 441 compared with acquiring arthritis prior to depression. Future studies are also needed to  
24  
25 442 understand how additional chronic conditions accumulate after the development of a  
26  
27 443 second and third condition. Finally, the incidence of specific dyads and triads reflects  
28  
29 444 the incidence of the individual conditions in specific age and sex groups. Many of these  
30  
31 445 dyads and triads are expected to develop simply by chance. Therefore, future studies  
32  
33 446 are needed to identify the dyads and triads that co-occur beyond chance. Identification  
34  
35 447 of incident dyads and triads that reflect shared etiologic mechanisms or shared risk  
36  
37 448 factors may lead to combined treatment or prevention strategies.  
38  
39  
40  
41  
42  
43  
44  
45

## 46 450 Conclusions and clinical implications

47  
48  
49 451 It is important and urgent to understand the causes and the consequences of  
50  
51 452 multimorbidity to inform efforts to delay and prevent disease onset and to develop  
52  
53 453 effective strategies for caring for patients with multimorbidity. We studied the incidence  
54  
55 454 of multimorbidity across all ages, separately in men and women, and in three ethnic  
56  
57  
58  
59  
60

1  
2  
3 455 groups in a geographically defined US population. The incidence of multimorbidity  
4  
5  
6 456 increased steeply with older age and was higher in Blacks but lower in Asians  
7  
8 457 compared to Whites. Men and women had a similar overall risk, but the combinations  
9  
10 458 of conditions within dyads and triads varied extensively by age and by sex. These data  
11  
12 459 represent an important first step toward identifying conditions which co-occur more  
13  
14 460 frequently than chance alone, identifying specific risk factors for multimorbidity,  
15  
16 461 understanding how chronic conditions accumulate over time, and toward identifying  
17  
18 462 combinations of conditions that predict adverse outcomes.  
19  
20  
21  
22  
23  
24  
25  
26  
27  
28  
29  
30  
31  
32  
33  
34  
35  
36  
37  
38  
39  
40  
41  
42  
43  
44  
45  
46  
47  
48  
49  
50  
51  
52  
53  
54  
55  
56  
57  
58  
59  
60

1  
2  
3 463 Competing interest declaration:  
4  
5

6 464 All authors have completed the Unified Competing Interest form at  
7  
8 465 [www.icmje.org/coi\\_disclosure.pdf](http://www.icmje.org/coi_disclosure.pdf) (available on request from the corresponding author)  
9  
10  
11 466 and declare that (1) none of the authors have support from any companies for the  
12  
13 467 submitted work; (2) none of the authors have any relationships with any companies that  
14  
15 468 might have an interest in the submitted work in the previous 3 years; (3) their spouses,  
16  
17 469 partners, or children have no financial relationships that may be relevant to the  
18  
19 470 submitted work; and (4) none of the authors have any non-financial interests that may  
20  
21 471 be relevant to the submitted work.  
22  
23  
24  
25

26 472 Contributorship statement: Dr. St. Sauver had full access to all of the data in the study  
27  
28 473 and takes responsibility for the integrity of the data and the accuracy of the data  
29  
30 474 analysis. She is the guarantor for the study.  
31  
32  
33

34 475 *Study concept and design:* St. Sauver, Boyd, Grossardt, Yawn, Rocca.  
35  
36

37 476 *Acquisition, analysis, or interpretation of data:* St. Sauver, Grossardt, Rocca.  
38  
39

40 477 *Drafting of the manuscript:* St. Sauver, Rocca.  
41  
42

43 478 *Critical revision of the manuscript for important intellectual content:* St. Sauver, Boyd,  
44  
45 479 Grossardt, Bobo, Finney Rutten, Roger, Ebbert, Therneau, Yawn, and Rocca.  
46  
47  
48

49 480 *Statistical analysis:* Grossardt, Therneau.  
50  
51

52 481 *Obtained funding:* Yawn, Rocca.  
53  
54

55 482 *Administrative, technical, or material support:* Yawn, Rocca.  
56  
57  
58  
59  
60



1  
2  
3 483 *Study supervision:* Yawn, Rocca.  
4  
5

6  
7 484 Identifiable patients: No identifiable patients were included.  
8  
9

10 485 Ethics approvals: The study was approved by both the Mayo Clinic (IRB number

11  
12 486 PR1945-99-08) and the Olmsted Medical Center (IRB number 016-OMC-11)

13  
14 487 Institutional Review Boards. Because the study only involved review of patient medical

15  
16 488 record information, the information used in this study was not deemed particularly

17  
18 489 sensitive, the confidentiality of the information was protected, and the study could not

19  
20 490 practicably be carried out if consent were required, both IRBs waived the requirement

21  
22 491 for informed consent. However, we only used data from persons that had previously

23  
24 492 provided a general authorization for their medical records to be used for research

25  
26 493 (Minnesota Research Authorization).  
27  
28  
29  
30  
31

32 494 All sources of funding: This study was made possible using the resources of the

33  
34 495 Rochester Epidemiology Project, which is supported by the National Institute on Aging

35  
36 496 of the National Institutes of Health under Award Number R01AG034676. The content is

37  
38 497 solely the responsibility of the authors and does not necessarily represent the official

39  
40 498 views of the National Institutes of Health. This study was also supported by the Mayo

41  
42 499 Clinic Robert D. and Patricia E. Kern Center for the Science of Health Care Delivery

43  
44 500 Population Health Research Program. Dr. Boyd was supported by the Paul Beeson

45  
46 501 Career Development Award Program (NIA K23 AG032910), the John A. Hartford

47  
48 502 Foundation, Atlantic Philanthropies, the Starr Foundation, and an anonymous donor.

49  
50 503 The authors of this report are responsible for its content.  
51  
52  
53  
54  
55  
56  
57  
58  
59  
60

1  
2  
3 504 Role of the Sponsors: The funders had no role in the design and conduct of the study;  
4  
5  
6 505 in the collection, analysis, and interpretation of the data; in the preparation, review, or  
7  
8 506 approval of the manuscript; or in the decision to submit the manuscript for publication.  
9

10  
11 507 Independence of researchers: All authors were independent from any funder or  
12  
13 508 company.  
14

15  
16  
17 509 Responsibility for the integrity of the data: All authors, external and internal, had full  
18  
19 510 access to all of the data (including statistical reports and tables) in the study and can  
20  
21 511 take responsibility for the integrity of the data and the accuracy of the data analysis.  
22  
23

24  
25 512 Transparency declaration: The lead author (the manuscript's guarantor, Dr. JLS)  
26  
27 513 affirms that the manuscript is an honest, accurate, and transparent account of the study  
28  
29 514 being reported; that no important aspects of the study have been omitted; and that any  
30  
31 515 discrepancies from the study as planned have been explained.  
32  
33

34  
35 516 Data sharing: No additional data available.  
36  
37

38 517 Exclusive license: I *Walter A. Rocca*, The Corresponding Author of this article  
39  
40 518 contained within the original manuscript which includes any diagrams & photographs  
41  
42 519 within and any related or stand alone film submitted (the Contribution") has the right to  
43  
44 520 grant on behalf of all authors and does grant on behalf of all authors, a licence to the  
45  
46 521 BMJ Publishing Group Ltd and its licencees, to permit this Contribution (if accepted) to  
47  
48 522 be published in the BMJ and any other BMJ Group products and to exploit all subsidiary  
49  
50 523 rights, as set out in our licence set out at: [http://www.bmj.com/about-bmj/resources-](http://www.bmj.com/about-bmj/resources-authors/forms-policies-and-checklists/copyright-open-access-and-permission-reuse)  
51  
52 524 [authors/forms-policies-and-checklists/copyright-open-access-and-permission-reuse.](http://www.bmj.com/about-bmj/resources-authors/forms-policies-and-checklists/copyright-open-access-and-permission-reuse)  
53  
54  
55  
56  
57  
58  
59  
60

## REFERENCES

1. Salive ME. Multimorbidity in Older Adults. *Epidemiol Rev.* 2013;35(1):75-83.
2. Anderson G. Chronic Care: Making the case for ongoing care. 2010; <http://www.rwjf.org/en/research-publications/find-rwjf-research/2010/02/chronic-care.html>. Accessed June 4, 2014.
3. Vogeli C, Shields AE, Lee TA, et al. Multiple chronic conditions: prevalence, health consequences, and implications for quality, care management, and costs. *J Gen Intern Med.* 2007;22 Suppl 3:391-395.
4. Thorpe KE, Ogden LL, Galactionova K. Chronic conditions account for rise in Medicare spending from 1987 to 2006. *Health Aff (Millwood).* 2010;29(4):718-724.
5. Sinnott C, Mc Hugh S, Browne J, Bradley C. GPs' perspectives on the management of patients with multimorbidity: systematic review and synthesis of qualitative research. *BMJ Open.* 2013;3(9):e003610.
6. Boyd CM, Wolff JL, Giovannetti E, et al. Healthcare task difficulty among older adults with multimorbidity. *Med Care.* 2014;52 Suppl 3:S118-125.
7. Ward BW, Schiller JS. Prevalence of multiple chronic conditions among US adults: estimates from the National Health Interview Survey, 2010. *Prev Chronic Dis.* 2013;10:E65.
8. Lochner KA, Cox CS. Prevalence of multiple chronic conditions among Medicare beneficiaries, United States, 2010. *Prev Chronic Dis.* 2013;10:E61.
9. Ashman JJ, Beresovsky V. Multiple chronic conditions among US adults who visited physician offices: data from the National Ambulatory Medical Care Survey, 2009. *Prev Chronic Dis.* 2013;10:E64.

- 1  
2  
3 **10.** Prados-Torres A, Calderon-Larranaga A, Hanco-Saavedra J, Poblador-Plou B, van den  
4 Akker M. Multimorbidity patterns: a systematic review. *J Clin Epidemiol.* 2014;67(3):254-  
5 266.  
6  
7
- 8  
9 **11.** Barnett K, Mercer SW, Norbury M, Watt G, Wyke S, Guthrie B. Epidemiology of  
10 multimorbidity and implications for health care, research, and medical education: a  
11 cross-sectional study. *Lancet.* 2012;380(9836):37-43.  
12  
13
- 14 **12.** Weiss CO, Boyd CM, Yu Q, Wolff JL, Leff B. Patterns of prevalent major chronic disease  
15 among older adults in the United States. *JAMA.* 2007;298(10):1160-1162.  
16  
17
- 18 **13.** Smith SM, Soubhi H, Fortin M, Hudon C, O'Dowd T. Managing patients with  
19 multimorbidity: systematic review of interventions in primary care and community  
20 settings. *BMJ.* 2012;345:e5205.  
21  
22
- 23 **14.** Uhlig K, Leff B, Kent D, et al. A framework for crafting clinical practice guidelines that are  
24 relevant to the care and management of people with multimorbidity. *J Gen Intern Med.*  
25 2014;29(4):670-679.  
26  
27
- 28 **15.** *U.S. Department of Health and Human Services. Multiple Chronic Conditions - A  
29 Strategic Framework: Optimum Health and Quality of Life for Individuals with Multiple  
30 Chronic Conditions. Washington, D.C. December 2010.*  
31  
32
- 33 **16.** Rocca WA, Boyd CM, Grossardt BR, et al. The prevalence of multimorbidity in a  
34 geographically defined American population: patterns by age, sex, and ethnicity. *Mayo  
35 Clin Proc.* 2014;89(10):1336-1349.  
36  
37
- 38 **17.** Rocca WA, Yawn BP, St Sauver JL, Grossardt BR, Melton LJ, 3rd. History of the  
39 Rochester Epidemiology Project: half a century of medical records linkage in a US  
40 population. *Mayo Clin Proc.* 2012;87(12):1202-1213.  
41  
42
- 43 **18.** St Sauver JL, Grossardt BR, Yawn BP, Melton LJ, 3rd, Rocca WA. Use of a medical  
44 records linkage system to enumerate a dynamic population over time: the Rochester  
45 Epidemiology Project. *Am J Epidemiol.* 2011;173(9):1059-1068.  
46  
47  
48  
49  
50  
51  
52  
53  
54  
55  
56  
57  
58  
59  
60

- 1  
2  
3  
4  
5  
6  
7  
8  
9  
10  
11  
12  
13  
14  
15  
16  
17  
18  
19  
20  
21  
22  
23  
24  
25  
26  
27  
28  
29  
30  
31  
32  
33  
34  
35  
36  
37  
38  
39  
40  
41  
42  
43  
44  
45  
46  
47  
48  
49  
50  
51  
52  
53  
54  
55  
56  
57  
58  
59  
60
19. St Sauver JL, Grossardt BR, Yawn BP, et al. Data resource profile: the Rochester Epidemiology Project (REP) medical records-linkage system. *Int J Epidemiol.* 2012;41(6):1614-1624.
  20. St Sauver JL, Grossardt BR, Leibson CL, Yawn BP, Melton LJ, 3rd, Rocca WA. Generalizability of epidemiological findings and public health decisions: an illustration from the Rochester Epidemiology Project. *Mayo Clin Proc.* 2012;87(2):151-160.
  21. Yawn BP, Yawn RA, Geier GR, Xia Z, Jacobsen SJ. The impact of requiring patient authorization for use of data in medical records research. *J Fam Pract.* 1998;47(5):361-365.
  22. Jacobsen SJ, Xia Z, Campion ME, et al. Potential effect of authorization bias on medical record research. *Mayo Clin Proc.* 1999;74(4):330-338.
  23. Goodman RA, Posner SF, Huang ES, Parekh AK, Koh HK. Defining and measuring chronic conditions: imperatives for research, policy, program, and practice. *Prev Chronic Disease.* 2013;10:E66.
  24. Cohen JW, Cohen SB, Banthin JS. The medical expenditure panel survey: a national information resource to support healthcare cost research and inform policy and practice. *Med Care.* 2009;47(7 Suppl 1):S44-50.
  25. Anderson DW, Mantel N. On epidemiologic surveys. *Am J Epidemiol.* 1983;118(5):613-619.
  26. Deming WE. Boundaries of Statistical Inference. In: Smith H, Johnson NL, eds. *New Developments in Survey Sampling.* New York: Wiley-Interscience; 1969:652-670.
  27. Grant RW, Ashburner JM, Hong CS, Chang Y, Barry MJ, Atlas SJ. Defining patient complexity from the primary care physician's perspective: a cohort study. *Ann Intern Med.* 2011;155(12):797-804.

- 1  
2  
3  
4  
5  
6  
7  
8  
9  
10  
11  
12  
13  
14  
15  
16  
17  
18  
19  
20  
21  
22  
23  
24  
25  
26  
27  
28  
29  
30  
31  
32  
33  
34  
35  
36  
37  
38  
39  
40  
41  
42  
43  
44  
45  
46  
47  
48  
49  
50  
51  
52  
53  
54  
55  
56  
57  
58  
59  
60
28. Palaniappan L, Carnethon MR, Wang Y, et al. Predictors of the incident metabolic syndrome in adults: the Insulin Resistance Atherosclerosis Study. *Diabetes Care*. 2004;27(3):788-793.
29. Hadaegh F, Hasheminia M, Lotfaliany M, Mohebi R, Azizi F, Tohidi M. Incidence of metabolic syndrome over 9 years follow-up; the importance of sex differences in the role of insulin resistance and other risk factors. *PloS One*. 2013;8(9):e76304.
30. Hebert PL, Geiss LS, Tierney EF, Engelgau MM, Yawn BP, McBean AM. Identifying persons with diabetes using Medicare claims data. *Am J Med Qual*. 1999;14(6):270-277.
31. Posner SF, Goodman RA. Multimorbidity at the local level: Implications and research directions. *Mayo Clin Proc*. 2014;89(10):1321-1323.
32. van den Akker M, Buntinx F, Metsemakers JF, Roos S, Knottnerus JA. Multimorbidity in general practice: prevalence, incidence, and determinants of co-occurring chronic and recurrent diseases. *J Clin Epidemiol*. 1998;51(5):367-375.
33. Melis R, Marengoni A, Angleman S, Fratiglioni L. Incidence and predictors of multimorbidity in the elderly: a population-based longitudinal study. *PloS One*. 2014;9(7):e103120.
34. Porta MS, International Epidemiological Association. *A Dictionary of Epidemiology*. 5th ed. Oxford; New York: Oxford University Press; 2008.
35. Szklo M, Nieto FJ. *Epidemiology: Beyond the Basics*. 2nd ed. Sudbury: Jones and Bartlett Publishers; 2007.
36. Steiner CA, Friedman B. Hospital utilization, costs, and mortality for adults with multiple chronic conditions, Nationwide Inpatient Sample, 2009. *Prev Chronic Dis*. 2013;10:E62.
37. Machlin SR, Soni A. Health care expenditures for adults with multiple treated chronic conditions: estimates from the Medical Expenditure Panel Survey, 2009. *Prev Chronic Dis*. 2013;10:E63.

- 1  
2  
3 **38.** Quinones AR, Liang J, Bennett JM, Xu X, Ye W. How does the trajectory of  
4  
5  
6 multimorbidity vary across Black, White, and Mexican Americans in middle and old age?  
7  
8 *J Gerontol B Psychol Sci Soc Sci.* 2011;66(6):739-749.  
9  
10  
11  
12  
13  
14  
15  
16  
17  
18  
19  
20  
21  
22  
23  
24  
25  
26  
27  
28  
29  
30  
31  
32  
33  
34  
35  
36  
37  
38  
39  
40  
41  
42  
43  
44  
45  
46  
47  
48  
49  
50  
51  
52  
53  
54  
55  
56  
57  
58  
59  
60

**Table 1.** Incidence of the second of two chronic conditions (per 1,000 person-years) in persons living in Olmsted County, MN by age, sex, and ethnicity.

| Ethnicity<br>age (years) | Men     |                  |                        | Women   |                  |                        |
|--------------------------|---------|------------------|------------------------|---------|------------------|------------------------|
|                          | Persons | Person-<br>years | Incidence<br>rate* (n) | Persons | Person-<br>years | Incidence<br>rate* (n) |
| <b>All ethnic groups</b> |         |                  |                        |         |                  |                        |
| 0-19                     | 18,879  | 140,653          | 6.5 (921)              | 18,024  | 134,725          | 8.5 (1,151)            |
| 20-39                    | 27,732  | 151,734          | 17.2 (2,613)           | 28,571  | 158,252          | 25.1 (3,972)           |
| 40-49                    | 16,396  | 82,324           | 43.6 (3,590)           | 16,713  | 85,660           | 45.8 (3,920)           |
| 50-59                    | 11,779  | 52,085           | 85.2 (4,436)           | 12,398  | 55,270           | 84.6 (4,674)           |
| 60-69                    | 5,218   | 19,653           | 139.4 (2,739)          | 5,603   | 21,246           | 135.3 (2,874)          |
| 70-79                    | 1,775   | 5,451            | 209.9 (1,144)          | 2,184   | 6,660            | 202.0 (1,345)          |
| ≥ 80                     | 531     | 1,589            | 260.0 (413)            | 1,016   | 2,887            | 277.1 (800)            |
| 0-64                     | 50,648  | 439,254          | 29.7 (13,059)          | 51,056  | 447,399          | 34.2 (15,319)          |
| ≥ 65                     | 3,794   | 14,236           | 196.5 (2,797)          | 4,636   | 17,300           | 197.5 (3,417)          |
| All ages                 | 52,479  | 453,489          | 35.0 (15,856)          | 53,582  | 464,699          | 40.3 (18,736)          |
| Standardized†            | ---     | ---              | 35.5                   | ---     | ---              | 38.8                   |
| <b>Blacks</b>            |         |                  |                        |         |                  |                        |
| 0-19                     | 877     | 6,411            | 5.5 (35)               | 749     | 5,362            | 6.0 (32)               |
| 20-39                    | 1,099   | 6,178            | 16.5 (102)             | 934     | 5,647            | 23.0 (130)             |
| 40-49                    | 429     | 1,836            | 63.2 (116)             | 324     | 1,392            | 61.8 (86)              |
| 50-59                    | 180     | 683              | 105.3 (72)             | 139     | 513              | 121.0 (62)             |
| 60-69                    | 60      | 223              | 134.8 (30)             | 47      | 150              | 193.2 (29)             |
| 70-79                    | 18      | 71               | 140.1 (10)             | 23      | 60               | 200.4 (12)             |
| ≥ 80                     | 4       | 11               | 274.0 (3)              | 3       | 5                | 580.3 (3)              |
| 0-64                     | 1,848   | 15,240           | 22.0 (335)             | 1,563   | 13,010           | 25.5 (332)             |
| ≥ 65                     | 48      | 173              | 190.8 (33)             | 37      | 118              | 185.7 (22)             |
| All ages                 | 1,873   | 15,413           | 23.9 (368)             | 1,587   | 13,128           | 27.0 (354)             |
| Standardized†            | ---     | ---              | 38.9                   | ---     | ---              | 48.5                   |
| <b>Asians</b>            |         |                  |                        |         |                  |                        |
| 0-19                     | 818     | 6,331            | 3.5 (22)               | 826     | 6,299            | 5.6 (35)               |
| 20-39                    | 1,090   | 6,372            | 15.1 (96)              | 1,168   | 7,167            | 14.6 (105)             |
| 40-49                    | 534     | 2,464            | 39.8 (98)              | 591     | 2,869            | 33.8 (97)              |
| 50-59                    | 339     | 1,588            | 71.8 (114)             | 376     | 1,687            | 79.4 (134)             |
| 60-69                    | 159     | 592              | 120.0 (71)             | 185     | 570              | 161.3 (92)             |
| 70-79                    | 51      | 163              | 140.8 (23)             | 74      | 177              | 271.6 (48)             |
| ≥ 80                     | 21      | 60               | 216.6 (13)             | 40      | 92               | 358.1 (33)             |
| 0-64                     | 1,897   | 17,137           | 21.6 (370)             | 1,997   | 18,399           | 23.3 (429)             |
| ≥ 65                     | 114     | 433              | 154.7 (67)             | 159     | 463              | 248.4 (115)            |
| All ages                 | 1,954   | 17,571           | 24.9 (437)             | 2,105   | 18,862           | 28.8 (544)             |
| Standardized†            | ---     | ---              | 29.5                   | ---     | ---              | 34.9                   |
| <b>Whites</b>            |         |                  |                        |         |                  |                        |
| 0-19                     | 14,956  | 119,686          | 6.8 (818)              | 14,414  | 114,906          | 9.0 (1,032)            |
| 20-39                    | 21,792  | 128,801          | 17.9 (2,303)           | 23,214  | 135,903          | 26.5 (3,599)           |
| 40-49                    | 14,426  | 74,921           | 43.6 (3,269)           | 15,088  | 79,123           | 46.1 (3,646)           |
| 50-59                    | 10,795  | 48,361           | 85.8 (4,149)           | 11,520  | 51,901           | 84.8 (4,399)           |



Table 1. Continued

| Ethnicity<br>age (years) | Men     |                  |                        | Women   |                  |                        |
|--------------------------|---------|------------------|------------------------|---------|------------------|------------------------|
|                          | Persons | Person-<br>years | Incidence<br>rate* (n) | Persons | Person-<br>years | Incidence<br>rate* (n) |
| 60-69                    | 4,823   | 18,362           | 140.4 (2,578)          | 5,221   | 20,075           | 134.7 (2,704)          |
| 70-79                    | 1,653   | 5,090            | 212.6 (1,082)          | 2,030   | 6,301            | 200.9 (1,266)          |
| ≥ 80                     | 497     | 1,495            | 262.8 (393)            | 953     | 2,754            | 274.5 (756)            |
| 0-64                     | 40,703  | 383,410          | 31.2 (11,952)          | 42,149  | 394,566          | 35.9 (14,170)          |
| ≥ 65                     | 3,517   | 13,306           | 198.4 (2,640)          | 4,317   | 16,398           | 197.1 (3,232)          |
| All ages                 | 42,382  | 396,716          | 36.8 (14,592)          | 44,465  | 410,964          | 42.3 (17,402)          |
| Standardized†            | ---     | ---              | 36.0                   | ---     | ---              | 39.4                   |

\* Incidence rates are reported per 1,000 person-years.

† Incidence rates were directly standardized to the total US population from the 2010 US Decennial Census after removing the number of people with prevalent multimorbidity ( $\geq 2$  chronic conditions) as projected from our previous study (see Supplementary Table B).<sup>16</sup>

**Table 2.** Incidence of the third of three chronic conditions (per 1,000 person-years) in persons living in Olmsted County, MN by age, sex, and ethnicity.

| Ethnicity<br>age (years) | Men     |                  |                        | Women   |                  |                        |
|--------------------------|---------|------------------|------------------------|---------|------------------|------------------------|
|                          | Persons | Person-<br>years | Incidence<br>rate* (n) | Persons | Person-<br>years | Incidence<br>rate* (n) |
| <b>All ethnic groups</b> |         |                  |                        |         |                  |                        |
| 0-19                     | 19,029  | 144,025          | 1.3 (186)              | 18,203  | 138,055          | 2.0 (282)              |
| 20-39                    | 28,721  | 162,693          | 6.9 (1,123)            | 30,135  | 177,878          | 10.9 (1,944)           |
| 40-49                    | 17,901  | 95,582           | 22.6 (2,157)           | 18,824  | 103,400          | 24.2 (2,507)           |
| 50-59                    | 14,398  | 69,907           | 52.8 (3,688)           | 15,475  | 76,247           | 51.5 (3,930)           |
| 60-69                    | 7,517   | 31,617           | 99.5 (3,146)           | 8,313   | 35,342           | 96.7 (3,416)           |
| 70-79                    | 3,109   | 10,639           | 169.7 (1,805)          | 3,899   | 13,653           | 156.4 (2,136)          |
| ≥ 80                     | 992     | 3,230            | 218.9 (707)            | 1,970   | 6,414            | 230.6 (1,479)          |
| 0-64                     | 53,073  | 491,536          | 18.0 (8,852)           | 54,280  | 517,164          | 20.2 (10,432)          |
| ≥ 65                     | 5,938   | 26,156           | 151.4 (3,960)          | 7,706   | 33,825           | 155.6 (5,262)          |
| All ages                 | 55,898  | 517,693          | 24.7 (12,812)          | 58,450  | 550,989          | 28.5 (15,694)          |
| Standardized†            | ---     | ---              | 25.5                   | ---     | ---              | 26.6                   |
| <b>Blacks</b>            |         |                  |                        |         |                  |                        |
| 0-19                     | 879     | 6,530            | 1.1 (7)                | 751     | 5,458            | 1.1 (6)                |
| 20-39                    | 1,123   | 6,428            | 8.6 (55)               | 960     | 6,032            | 9.4 (57)               |
| 40-49                    | 460     | 2,126            | 34.8 (74)              | 373     | 1,723            | 41.2 (71)              |
| 50-59                    | 218     | 952              | 69.3 (66)              | 173     | 737              | 69.2 (51)              |
| 60-69                    | 81      | 312              | 96.1 (30)              | 70      | 241              | 132.8 (32)             |
| 70-79                    | 27      | 108              | 129.4 (14)             | 28      | 84               | 191.0 (16)             |
| ≥ 80                     | 5       | 23               | 172.3 (4)              | 5       | 9                | 321.2 (3)              |
| 0-64                     | 1,883   | 16,227           | 13.3 (216)             | 1,602   | 14,101           | 14.5 (205)             |
| ≥ 65                     | 58      | 252              | 135.1 (34)             | 54      | 183              | 169.2 (31)             |
| All ages                 | 1,911   | 16,479           | 15.2 (250)             | 1,633   | 14,284           | 16.5 (236)             |
| Standardized†            | ---     | ---              | 28.2                   | ---     | ---              | 34.8                   |
| <b>Asians</b>            |         |                  |                        |         |                  |                        |
| 0-19                     | 823     | 6,419            | 0.6 (4)                | 832     | 6,442            | 1.6 (10)               |
| 20-39                    | 1,109   | 6,747            | 6.2 (42)               | 1,206   | 7,587            | 4.6 (35)               |
| 40-49                    | 574     | 2,841            | 18.7 (53)              | 651     | 3,327            | 20.7 (69)              |
| 50-59                    | 390     | 1,942            | 44.8 (87)              | 439     | 2,191            | 46.1 (101)             |
| 60-69                    | 203     | 830              | 78.3 (65)              | 254     | 966              | 97.3 (94)              |
| 70-79                    | 80      | 259              | 138.8 (36)             | 110     | 353              | 141.5 (50)             |
| ≥ 80                     | 32      | 84               | 202.0 (17)             | 84      | 228              | 241.2 (55)             |
| 0-64                     | 1,940   | 18,472           | 12.2 (225)             | 2,074   | 20,167           | 12.9 (261)             |
| ≥ 65                     | 165     | 650              | 121.5 (79)             | 258     | 929              | 164.7 (153)            |
| All ages                 | 2,027   | 19,122           | 15.9 (304)             | 2,235   | 21,096           | 19.6 (414)             |
| Standardized†            | ---     | ---              | 21.1                   | ---     | ---              | 23.2                   |
| <b>Whites</b>            |         |                  |                        |         |                  |                        |
| 0-19                     | 15,088  | 122,717          | 1.3 (160)              | 14,576  | 117,885          | 2.2 (259)              |
| 20-39                    | 22,681  | 138,725          | 7.1 (990)              | 24,638  | 154,160          | 11.7 (1,799)           |
| 40-49                    | 15,811  | 87,199           | 22.7 (1,978)           | 17,025  | 95,693           | 24.1 (2,308)           |
| 50-59                    | 13,262  | 65,243           | 53.1 (3,464)           | 14,443  | 71,770           | 51.7 (3,714)           |

Table 2. Continued

| Ethnicity<br>age (years) | Men     |                  |                        | Women   |                  |                        |
|--------------------------|---------|------------------|------------------------|---------|------------------|------------------------|
|                          | Persons | Person-<br>years | Incidence<br>rate* (n) | Persons | Person-<br>years | Incidence<br>rate* (n) |
| 60-69                    | 7,028   | 29,816           | 100.8 (3,005)          | 7,796   | 33,477           | 96.9 (3,244)           |
| 70-79                    | 2,930   | 10,061           | 171.9 (1,729)          | 3,680   | 13,006           | 157.2 (2,045)          |
| ≥ 80                     | 942     | 3,093            | 219.5 (679)            | 1,848   | 6,105            | 231.0 (1,410)          |
| 0-64                     | 42,953  | 432,089          | 19.0 (8,213)           | 45,157  | 459,919          | 21.2 (9,761)           |
| ≥ 65                     | 5,572   | 24,764           | 153.1 (3,792)          | 7,224   | 32,177           | 155.9 (5,018)          |
| All ages                 | 45,583  | 456,853          | 26.3 (12,005)          | 49,033  | 492,097          | 30.0 (14,779)          |
| Standardized†            | ---     | ---              | 25.7                   | ---     | ---              | 27.0                   |

\* Incidence rates are reported per 1,000 person-years.

† Incidence rates were directly standardized to the total US population from the 2010 US Decennial Census after removing the number of people with prevalent multimorbidity (≥ 3 chronic conditions) as projected from our previous study (see Supplementary Table B).<sup>16</sup>

**Table 3.** Incidence rates (per 1,000 person-years) and composition of the most common dyads and triads of chronic conditions in persons living in Olmsted County, MN by age and sex.

| Age<br>(years)<br>Rank * | Dyad          |            |               |            | Triad            |            |                  |            |
|--------------------------|---------------|------------|---------------|------------|------------------|------------|------------------|------------|
|                          | Men           |            | Women         |            | Men              |            | Women            |            |
|                          | Combination † | Rate (n) ‡ | Combination † | Rate (n) ‡ | Combination †    | Rate (n) § | Combination †    | Rate (n) § |
| <b>0 – 19</b>            |               |            |               |            |                  |            |                  |            |
| 1                        | DEP - AST     | 1.8 (257)  | DEP - AST     | 2.9 (395)  | DEP - AST - SUB  | 0.4 (53)   | DEP - AST - SUB  | 0.4 (62)   |
| 2                        | DEP - SUB     | 1.3 (178)  | DEP - SUB     | 1.8 (240)  | DEP - AST - COPD | 0.1 (17)   | DEP - AST - COPD | 0.3 (39)   |
| 3                        | AST - COPD    | 0.9 (122)  | AST - COPD    | 0.7 (91)   | DEP - SUB - SZO  | 0.1 (8)    | DEP - ARR - AST  | 0.2 (27)   |
| 4                        | AST - SUB     | 0.4 (56)   | DEP - ARR     | 0.4 (50)   | LIP - DEP - AST  | <0.1 (7)   | DEP - ARR - SUB  | 0.1 (13)   |
| 5                        | DEP - ARR     | 0.1 (21)   | DEP - COPD    | 0.4 (48)   | 3-way tie ¶      | < 0.1 (6)  | DEP - SUB - COPD | 0.1 (12)   |
| <b>20 – 39</b>           |               |            |               |            |                  |            |                  |            |
| 1                        | DEP - SUB     | 3.5 (525)  | DEP - AST     | 3.4 (531)  | DEP - AST - SUB  | 0.4 (73)   | DEP - AST - SUB  | 0.8 (134)  |
| 2                        | LIP - HTN     | 1.4 (207)  | DEP - SUB     | 2.9 (463)  | DEP - SUB - SZO  | 0.4 (69)   | DEP - AST - COPD | 0.7 (121)  |
| 3                        | DEP - AST     | 1.1 (174)  | DEP - CAN     | 2.0 (309)  | LIP - HTN - DIA  | 0.4 (65)   | DEP - ARR - AST  | 0.4 (77)   |
| 4                        | LIP - DEP     | 1.0 (155)  | LIP - DEP     | 1.7 (267)  | DEP - ARR - SUB  | 0.3 (46)   | DEP - SUB - COPD | 0.3 (61)   |
| 5                        | LIP - DIA     | 0.9 (137)  | DEP - ARR     | 1.4 (222)  | LIP - HTN - DEP  | 0.3 (45)   | LIP - DEP - AST  | 0.3 (58)   |
| <b>40 – 49</b>           |               |            |               |            |                  |            |                  |            |
| 1                        | LIP - HTN     | 7.0 (580)  | LIP - DEP     | 4.1 (354)  | LIP - HTN - DIA  | 3.1 (294)  | LIP - HTN - DIA  | 1.4 (147)  |
| 2                        | LIP - DIA     | 4.4 (363)  | LIP - HTN     | 3.6 (308)  | LIP - HTN - DEP  | 1.2 (115)  | LIP - HTN - DEP  | 1.1 (114)  |
| 3                        | LIP - DEP     | 3.5 (285)  | DEP - ART     | 2.6 (224)  | LIP - HTN - ART  | 0.9 (84)   | LIP - DEP - DIA  | 1.0 (99)   |
| 4                        | LIP - ART     | 2.4 (198)  | DEP - CAN     | 2.6 (224)  | LIP - HTN - CAD  | 0.9 (83)   | LIP - DEP - ART  | 0.8 (84)   |
| 5                        | DEP - SUB     | 1.9 (157)  | HTN - DEP     | 2.4 (203)  | LIP - DEP - DIA  | 0.8 (74)   | LIP - DEP - AST  | 0.6 (63)   |
| <b>50 – 59</b>           |               |            |               |            |                  |            |                  |            |
| 1                        | LIP - HTN     | 14.5 (757) | LIP - HTN     | 9.8 (540)  | LIP - HTN - DIA  | 7.2 (504)  | LIP - HTN - DIA  | 3.9 (300)  |
| 2                        | LIP - DIA     | 8.7 (455)  | LIP - ART     | 6.5 (359)  | LIP - HTN - ART  | 3.5 (242)  | LIP - HTN - ART  | 3.0 (232)  |
| 3                        | LIP - ART     | 6.7 (351)  | LIP - DEP     | 5.9 (325)  | LIP - HTN - CAD  | 3.0 (208)  | LIP - HTN - DEP  | 2.4 (185)  |
| 4                        | LIP - CAN     | 4.6 (241)  | DEP - ART     | 4.8 (265)  | LIP - HTN - DEP  | 1.9 (131)  | LIP - DEP - ART  | 2.4 (180)  |
| 5                        | HTN - DIA     | 4.4 (227)  | LIP - CAN     | 4.5 (246)  | LIP - HTN - ARR  | 1.7 (117)  | LIP - HTN - CAN  | 1.8 (136)  |

Table 3. Continued 1

| Age<br>(years)<br>Rank * | Dyad          |            |               |            | Triad           |            |                 |            |
|--------------------------|---------------|------------|---------------|------------|-----------------|------------|-----------------|------------|
|                          | Men           |            | Women         |            | Men             |            | Women           |            |
|                          | Combination † | Rate (n) ‡ | Combination † | Rate (n) ‡ | Combination †   | Rate (n) § | Combination †   | Rate (n) § |
| <b>60 – 69</b>           |               |            |               |            |                 |            |                 |            |
| 1                        | LIP - HTN     | 23.4 (460) | LIP - HTN     | 18.8 (400) | LIP - HTN - DIA | 11.6 (366) | LIP - HTN - ART | 10.3 (363) |
| 2                        | LIP - DIA     | 11.5 (226) | LIP - ART     | 15.5 (330) | LIP - HTN - ART | 6.8 (214)  | LIP - HTN - DIA | 7.4 (263)  |
| 3                        | LIP - ART     | 11.4 (224) | HTN - ART     | 10.4 (220) | LIP - HTN - CAD | 6.3 (200)  | LIP - HTN - CAN | 4.6 (164)  |
| 4                        | LIP - CAN     | 10.0 (196) | LIP - CAN     | 6.8 (145)  | LIP - HTN - CAN | 4.9 (155)  | LIP - ART - CAN | 2.9 (102)  |
| 5                        | HTN - DIA     | 8.6 (169)  | LIP - DIA     | 6.4 (135)  | LIP - HTN - ARR | 3.4 (106)  | LIP - DIA - ART | 2.7 (95)   |
| 6                        | HTN - ART     | 7.7 (152)  | ART - CAN     | 4.9 (105)  | LIP - DIA - ART | 2.9 (91)   | LIP - HTN - DEP | 2.6 (93)   |
| 7                        | LIP - CAD     | 6.9 (136)  | LIP - OST     | 4.9 (105)  | LIP - ART - CAN | 2.6 (82)   | LIP - DEP - ART | 2.5 (89)   |
| 8                        | HTN - CAN     | 6.2 (121)  | HTN - CAN     | 4.8 (103)  | LIP - DIA - CAD | 2.4 (76)   | LIP - ART - ARR | 2.3 (83)   |
| 9                        | ART - CAN     | 4.5 (89)   | HTN - DIA     | 4.6 (97)   | HTN - DIA - ART | 2.2 (71)   | LIP - HTN - OST | 2.2 (79)   |
| 10                       | LIP - ARR     | 4.5 (88)   | LIP - DEP     | 4.4 (94)   | LIP - ARR - CAD | 2.2 (68)   | HTN - DIA - ART | 2.2 (77)   |
| <b>70 – 79</b>           |               |            |               |            |                 |            |                 |            |
| 1                        | LIP - HTN     | 19.1 (104) | LIP - HTN     | 26.0 (173) | LIP - HTN - CAN | 11.9 (127) | LIP - HTN - ART | 15.7 (214) |
| 2                        | HTN - CAN     | 18.9 (103) | HTN - ART     | 18.5 (123) | LIP - HTN - DIA | 10.4 (111) | LIP - HTN - DIA | 9.8 (134)  |
| 3                        | LIP - CAN     | 15.0 (82)  | LIP - ART     | 15.5 (103) | LIP - HTN - CAD | 9.7 (103)  | LIP - HTN - CAN | 6.0 (82)   |
| 4                        | HTN - ART     | 13.2 (72)  | LIP - OST     | 9.0 (60)   | LIP - HTN - ART | 9.4 (100)  | LIP - ART - CAN | 5.4 (74)   |
| 5                        | ART - CAN     | 11.6 (63)  | HTN - CAN     | 8.9 (59)   | LIP - HTN - ARR | 5.5 (58)   | HTN - ART - CAN | 5.2 (71)   |
| 6                        | LIP - ART     | 11.6 (63)  | HTN - OST     | 8.3 (55)   | HTN - ART - CAN | 4.9 (52)   | LIP - ART - OST | 5.2 (71)   |
| 7                        | HTN - DIA     | 10.1 (55)  | ART - CAN     | 8.1 (54)   | LIP - ART - CAN | 4.7 (50)   | LIP - HTN - OST | 4.6 (63)   |
| 8                        | HTN - ARR     | 9.9 (54)   | ART - OST     | 7.8 (52)   | HTN - CAN - ARR | 4.2 (45)   | LIP - HTN - ARR | 4.5 (62)   |
| 9                        | LIP - CAD     | 7.7 (42)   | HTN - DIA     | 7.8 (52)   | HTN - ART - ARR | 4.1 (44)   | HTN - ART - OST | 4.0 (55)   |
| 10                       | LIP - DIA     | 7.7 (42)   | LIP - CAN     | 7.8 (52)   | LIP - DIA - CAN | 4.1 (44)   | 2-way tie ¶     | 3.4 (47)   |
| <b>≥ 80</b>              |               |            |               |            |                 |            |                 |            |
| 1                        | HTN - CAN     | 18.9 (30)  | HTN - ART     | 27.7 (80)  | HTN - CAN - ARR | 8.7 (28)   | LIP - HTN - ART | 10.3 (66)  |
| 2                        | HTN - ARR     | 17.6 (28)  | LIP - HTN     | 23.2 (67)  | LIP - HTN - CAN | 7.7 (25)   | HTN - ART - OST | 9.8 (63)   |
| 3                        | HTN - ART     | 14.5 (23)  | HTN - ARR     | 17.7 (51)  | HTN - ART - CAN | 7.4 (24)   | HTN - ART - CAN | 9.2 (59)   |

Table 3. Continued 2

| Age (years)<br>Rank * | Dyad          |            |               |            | Triad           |            |                 |            |
|-----------------------|---------------|------------|---------------|------------|-----------------|------------|-----------------|------------|
|                       | Men           |            | Women         |            | Men             |            | Women           |            |
|                       | Combination † | Rate (n) ‡ | Combination † | Rate (n) ‡ | Combination †   | Rate (n) § | Combination †   | Rate (n) § |
| 4                     | ART - ARR     | 12.0 (19)  | HTN - CAN     | 15.2 (44)  | LIP - HTN - ART | 6.2 (20)   | HTN - ART - ARR | 9.0 (58)   |
| 5                     | CAN - ARR     | 12.0 (19)  | HTN - OST     | 14.9 (43)  | LIP - HTN - ARR | 5.9 (19)   | LIP - HTN - OST | 5.9 (38)   |
| 6                     | HTN - CAD     | 10.1 (16)  | HTN - DEM     | 11.8 (34)  | ART - CAN - ARR | 5.3 (17)   | LIP - HTN - DIA | 5.0 (32)   |
| 7                     | LIP - HTN     | 10.1 (16)  | ART - CAN     | 10.0 (29)  | HTN - ART - ARR | 5.3 (17)   | LIP - HTN - ARR | 4.7 (30)   |
| 8                     | ART - CAN     | 8.8 (14)   | ART - OST     | 9.7 (28)   | HTN - CAN - CAD | 5.0 (16)   | LIP - HTN - CAN | 4.5 (29)   |
| 9                     | CAN - CAD     | 8.8 (14)   | HTN - CKD     | 7.6 (22)   | LIP - HTN - CAD | 5.0 (16)   | ART - CAN - OST | 4.4 (28)   |
| 10                    | HTN - DEM     | 8.8 (14)   | 3-way tie **  | 7.3 (21)   | LIP - ART - CAN | 4.6 (15)   | LIP - HTN - CAD | 3.9 (25)   |

\* Rank order from the most frequent to the least frequent incident dyad or triad. For the younger age groups (through age 59 years), we reported the 5 most frequent incident combinations; for the older age groups (60 years and older), we reported the 10 most frequent incident combinations.

† Definition of acronyms in order of frequency: LIP = hyperlipidemia; HTN = hypertension; DEP = depression; DIA = diabetes; ART = arthritis; CAN = cancer; ARR = cardiac arrhythmias; AST = asthma; CAD = coronary artery disease; SUB = substance abuse disorders; COPD = chronic obstructive pulmonary disease; OST = osteoporosis; CKD = chronic kidney disease; STR = stroke; CHF = congestive heart failure; DEM = dementia; SZO = schizophrenia; HEP = hepatitis; AUT = autism spectrum disorder; and HIV = human immunodeficiency virus.

‡ Incidence rates per 1,000 person years. Rates can be calculated by dividing the number of incident persons in parentheses by the person-years at risk of 2 conditions from each age- and sex-specific stratum for all ethnic groups combined in Table 1.

§ Incidence rates per 1,000 person years. Rates can be calculated by dividing the number of incident persons in parentheses by the person-years at risk of 3 conditions from each age- and sex-specific stratum for all ethnic groups combined in Table 2.

|| Three-way tie for the rank 5 triad in men ages 0-19 years: 1) AST-SUB-COPD; 2) DEP-ARR-SUB; 3) DEP-AST-DEM.

¶ Two-way tie for the rank 10 triad in women ages 70-79 years: 1) HTN-ART-ARR; 2) LIP-CAN-OST.

\*\* Three-way tie for the rank 10 dyad in women ages ≥ 80 years: 1) ART-ARR; 2) HTN-DIA; 3) LIP-ART.

## Figure Legends

**Figure 1.** Age- and sex-specific incidence rates (per 1,000 person-years) of the 20 chronic conditions considered separately. The 20 panels are presented by rows in decreasing order of frequency (by overall age- and sex-standardized prevalence).<sup>16</sup>

**Figure 2.** Incidence rates (per 1,000 person-years) of 2 chronic conditions (second condition in a dyad) and of 3 chronic conditions (third condition in a triad) in men and women separately (panels A and C), and stratified by ethnicity (panels B and D).

1  
2  
3  
4 1 **Risk of developing multimorbidity across all ages in an**  
5  
6  
7 2 **historical cohort study: differences by sex and ethnicity**  
8

9  
10 3 Jennifer L. St. Sauver *associate professor*<sup>1 2</sup>, Cynthia M. Boyd *associate professor*<sup>3</sup>,  
11 4 Brandon R. Grossardt *biostatistician*<sup>4</sup>, William V. Bobo *assistant professor*<sup>5</sup>, Lila J.  
12 5 Finney Rutten *associate professor*<sup>1 2</sup>, Véronique L. Roger *professor*<sup>1 2 6</sup>, Jon O. Ebbert  
13 6 *professor*<sup>2</sup>, Terry M. Therneau *professor*<sup>4</sup>, Barbara P. Yawn *director of research*<sup>1 7</sup>,  
14 7 Walter A. Rocca *professor*<sup>1 8</sup>  
15  
16  
17  
18  
19  
20  
21  
22  
23  
24  
25

26 9 **Author Affiliations:** <sup>1</sup> Division of Epidemiology, Department of Health Sciences  
27  
28 10 Research, College of Medicine, Mayo Clinic, 200 First Street SW, Rochester, MN  
29  
30 11 55905, USA; <sup>2</sup> The Robert D. and Patricia E. Kern Center for the Science of Health  
31  
32 12 Care Delivery, College of Medicine, Mayo Clinic, 200 First Street SW, Rochester, MN  
33  
34 13 55905, USA; <sup>3</sup> Division of Geriatric Medicine and Gerontology, School of Medicine,  
35  
36 14 Johns Hopkins University, 600 North Wolfe Street, Baltimore, MD 21287, USA; <sup>4</sup>  
37  
38 15 Division of Biomedical Statistics and Informatics, Department of Health Sciences  
39  
40 16 Research, College of Medicine, Mayo Clinic, 200 First Street SW, Rochester, MN  
41  
42 17 55905, USA; <sup>5</sup> Department of Psychiatry and Psychology, College of Medicine, Mayo  
43  
44 18 Clinic, 200 First Street SW, Rochester, MN 55905, USA; <sup>6</sup> Division of Cardiovascular  
45  
46 19 Diseases, Department of Internal Medicine, College of Medicine, Mayo Clinic, 200 First  
47  
48 20 Street SW, Rochester, MN 55905, USA; <sup>7</sup> Department of Research, Olmsted Medical  
49  
50 21 Center, 210 Ninth Street SE, Rochester, MN 55904, USA; <sup>8</sup> Department of Neurology,  
51  
52 22 College of Medicine, Mayo Clinic, 200 First Street SW, Rochester, MN 55905, USA  
53  
54  
55  
56  
57  
58  
59  
60



1  
2  
3 23 **Word Count:** (4,427/approximately 4,000)  
4

5 24 **Abstract:** (291/300)  
6

7  
8 25 **Strengths and limitations of this study:** 219  
9

10 26 **References:** 38  
11

12 27 **Figures/Tables:** (5/5)  
13

14 28 **Supplementary Tables:** 3  
15  
16  
17  
18  
19  
20

21 30 **Corresponding Author:** Walter A. Rocca, MD, MPH, Division of Epidemiology,  
22  
23 Department of Health Sciences Research, Mayo Clinic, 200 First Street SW, Rochester,  
24 31  
25 MN 55905 (telephone: 507-284-3568; fax: 507-284-1516; e-mail: [rocca@mayo.edu](mailto:rocca@mayo.edu)).  
26 32  
27  
28  
29

30 33  
31  
32 34 Extra material supplied by the author: Supplementary tables A-C  
33  
34  
35  
36 35  
37  
38  
39  
40  
41  
42  
43  
44  
45  
46  
47  
48  
49  
50  
51  
52  
53  
54  
55  
56  
57  
58  
59  
60

1  
2  
3  
4 36 **ABSTRACT**

5  
6 37 **Objective:** To study the incidence of de novo multimorbidity across all ages in a  
7  
8  
9 38 geographically defined population with an emphasis on sex and ethnic differences.

10  
11 39  
12  
13 40 **Design:** Historical cohort study.  
14  
15  
16 41

17  
18 42 **Setting:** All persons residing in Olmsted County, Minnesota, USA on January 1, 2000  
19  
20 43 who had not refused permission for their records to be used for research (n = 123,716).  
21  
22  
23 44

24  
25 45 **Participants:** We used the Rochester Epidemiology Project medical records-linkage  
26  
27 46 system to identify all of the county residents. We identified and removed from the  
28  
29 47 cohort all persons who had developed multimorbidity before January 1, 2000 (baseline  
30  
31 48 date), and we followed the cohort over 14 years (January 1, 2000 through December  
32  
33 49 31, 2013).  
34  
35  
36 50

37  
38  
39 51 **Main outcome measures:** Incident multimorbidity was defined as the development of  
40  
41 52 the second of 2 conditions (dyads) from among the 20 chronic conditions selected by  
42  
43 53 the United States Department of Health and Human Services. We also studied the  
44  
45 54 incidence of the third of 3 conditions (triads) from among the 20 chronic conditions.  
46  
47  
48 55

49  
50  
51 56 **Results:** The incidence of multimorbidity increased steeply with older age; however, the  
52  
53 57 number of people with incident multimorbidity was substantially greater in people  
54  
55 58 younger than 65 years compared to people age 65 years or older (28,378 vs. 6,214).  
56  
57  
58  
59  
60

1  
2  
3 59 The overall risk was similar in men and women; however, the combinations of  
4  
5  
6 60 conditions (dyads and triads) differed extensively by age and by sex. Compared to  
7  
8 61 Whites, the incidence of multimorbidity was higher in Blacks and lower in Asians.  
9  
10 62

11  
12 63 **Conclusions:** The risk of developing de novo multimorbidity increases steeply with  
13  
14  
15 64 older age, varies by ethnicity, and is similar in men and women overall. However, **as**  
16  
17 65 **expected**, the combinations of conditions vary extensively by age and sex. These data  
18  
19  
20 66 represent an important first step toward identifying the causes and the consequences of  
21  
22 67 multimorbidity.  
23  
24  
25 68

## 69 **ARTICLE SUMMARY: Strengths and limitations of this study**

- 70 ■ This is one of the first studies worldwide focusing on the incidence of  
71 multimorbidity rather than on the prevalence of multimorbidity. Prevalence  
72 reflects both the effect of incidence and of survival after the onset of  
73 multimorbidity. We used a simple definition of incident multimorbidity that can be  
74 replicated in other populations.
- 75 ■ This study covered an entire geographically defined population, and used a  
76 unique records-linkage system. Persons were followed historically over 14  
77 years. None of the data were derived from self-report or interviews.
- 78 ■ Studies of multimorbidity require the definition of the number of conditions  
79 considered, of the time window of occurrence, and of the source of data (medical  
80 records vs. interview). We used the 20 conditions recommended by the United  
81 States Department of Health and Human Services. These 20 conditions  
82 represent a first consensus list; however, not all of the conditions have the same  
83 impact on the complexity of care or on the quality of life of patients.
- 84 ■ Potential limitations of this study include the uncertain validity of diagnostic  
85 codes, the possible incompleteness of information due to in or out migration, and  
86 the inability to generalize our findings to other populations with different  
87 demographic or social characteristics.
- 88 ■ Replication of this study in other populations in the United States and worldwide  
89 will allow for useful comparisons.

## 91 INTRODUCTION

92 The demographic expansion of the elderly population and the improvements in survival  
93 of people affected by chronic conditions have caused a dramatic rise in the number of  
94 people living with multimorbidity ( $\geq 2$  chronic conditions). In the United States, the  
95 prevalence of multimorbidity among Medicare recipients increases from 62% at age 65 -  
96 74 years to 82% at ages 85 years and older.<sup>1</sup> The monetary costs associated with  
97 managing patients with multiple chronic conditions are overwhelming.<sup>2-4</sup> In addition,  
98 fragmented health care in patients with multimorbidity causes a particularly high risk for  
99 complications and a lower quality of life.<sup>5,6</sup>

100 Several studies have described the prevalence of multimorbidity in a wide range  
101 of populations.<sup>1,7-12</sup> Additional studies have focused on how to manage patients with  
102 multiple chronic conditions.<sup>13,14</sup> However, in 2010 the United States Department of  
103 Health and Human Services (US-DHHS) highlighted the critical need to identify groups  
104 of individuals at higher risk of developing multimorbidity (first appearance of  
105 multimorbidity). Such studies of incident multimorbidity are essential to identify patterns  
106 of disease accumulation, and to identify the populations at high risk of developing  
107 multimorbidity. For example, multimorbidity is highly prevalent in the elderly; however,  
108 many of the processes that lead to multimorbidity begin at much earlier ages.  
109 Therefore, data on the ages at which multimorbidity begins and on the patterns of  
110 accumulation of conditions over time are urgently needed to develop focused  
111 interventions to prevent multimorbidities and their adverse health outcomes.<sup>15</sup>

112 Unfortunately, there are currently no population-based data on the incidence of  
113 multimorbidity in the United States across all ages, even though multimorbidity is a high

1  
2  
3 114 public health priority for the nation.<sup>15</sup> The Rochester Epidemiology Project (REP)  
4  
5 115 medical records-linkage system captures long-term medical information on a stable  
6  
7  
8 116 population, and is therefore uniquely positioned to study the incidence of multimorbidity.  
9  
10 117 In a previous paper, we described in detail the patterns of prevalent multimorbidity in  
11  
12 118 this population.<sup>16</sup> In this study, we further leveraged this data resource to examine the  
13  
14 119 incidence of multimorbidity across all ages, separately in men and women, and in three  
15  
16  
17 120 ethnic groups.<sup>17</sup>  
18  
19  
20 121

## 22 122 **METHODS**

### 25 123 **Study population**

26  
27  
28 124 The REP has tracked and linked health care information for the population of Olmsted  
29  
30 125 County, MN, since 1966.<sup>17-19</sup> The vast majority of medical care in this community is  
31  
32 126 currently provided by a few health care institutions: Olmsted Medical Center and its  
33  
34 127 affiliated hospital, Mayo Clinic and its two affiliated hospitals, the Rochester Family  
35  
36 128 Medicine Clinic, and a few smaller care facilities. The health care records from these  
37  
38 129 institutions are linked together through the REP records-linkage system.<sup>17-19</sup> Persons  
39  
40 130 are considered residents of Olmsted County at the time of each health care visit based  
41  
42 131 on their address. Over the years, this address information has been accumulated and  
43  
44 132 is used to define who resided in Olmsted County at any given point in time since 1966  
45  
46 133 (REP Census). The population counts obtained by the REP Census are similar to those  
47  
48 134 obtained by the US Census, indicating that virtually the entire population of the county is  
49  
50 135 captured by the system.<sup>18-20</sup> We used the REP Census to identify all individuals who  
51  
52 136 resided in Olmsted County on January 1, 2000 (baseline date); however, we included  
53  
54  
55  
56  
57  
58  
59  
60

1  
2  
3 137 only individuals who had not refused permission to use their medical records for  
4  
5 138 research (Minnesota research authorization).<sup>18,21,22</sup>  
6  
7  
8 139

## 10 140 **Definition of incident multimorbidity**

11  
12  
13 141 We focused on 20 selected chronic conditions recommended by the US-DHHS for  
14  
15 142 studying multimorbidity.<sup>23,24</sup> The list of the 20 conditions and the corresponding ICD-9  
16  
17 143 codes used in this study are provided in Supplementary Table A.<sup>23,24</sup> We first identified  
18  
19 144 all ICD-9 codes associated with these 20 chronic conditions that occurred in the  
20  
21 145 population between January 1, 1995 and December 31, 1999 (5 years before the  
22  
23 146 baseline date, January 1, 2000). Persons who did not have any ICD-9 code for a given  
24  
25 147 condition were assumed to not have the condition of interest. By contrast, residents  
26  
27 148 were defined as having a chronic condition if they had at least two ICD-9 codes for that  
28  
29 149 condition separated by more than 30 days, and the incidence date was assigned at the  
30  
31 150 time they received a second diagnostic code.  
32  
33  
34  
35  
36

37 151 Persons who had 2 or more of the 20 conditions at baseline were considered to  
38  
39 152 have prevalent multimorbidity and were therefore excluded from incidence analyses of 2  
40  
41 153 chronic conditions (dyads). Similarly, persons who had 3 or more of the 20 conditions  
42  
43 154 at baseline were excluded from incidence analyses of 3 chronic conditions (triads). All  
44  
45 155 persons in this fixed population cohort were followed historically through the REP  
46  
47 156 records-linkage system for approximately 14 years to study the emergence of new  
48  
49 157 conditions.  
50  
51  
52  
53  
54

## 55 158 56 159 **Statistical Analyses**

57  
58  
59  
60

1  
2  
3 160 All persons in the cohort were followed from January 1, 2000 through the last contact  
4  
5 161 with the records-linkage system (the earliest of death date, last medical visit date, or  
6  
7 162 December 31, 2013). The incidence of each of the 20 chronic conditions was  
8  
9 163 calculated among persons free of that condition at baseline. Persons contributed  
10  
11 164 person-years to the denominator for the incidence of 2 conditions (development of a  
12  
13 165 second condition in a dyad) only during the time when they had 0 or 1 chronic  
14  
15 166 conditions, whereas persons contributed person-years to the denominator for the  
16  
17 167 incidence of 3 chronic conditions (development of a third condition in a triad) only when  
18  
19 168 they had 0, 1, or 2 chronic conditions. Although the majority of people accumulated  
20  
21 169 conditions one-at-a-time, some subjects jumped from 0 to 2 conditions, or from 1 to 3,  
22  
23 170 or even from 0 to 3 conditions. For example, a person previously considered free of all  
24  
25 171 of the 20 conditions who was diagnosed with hyperlipidemia, hypertension, and  
26  
27 172 depression during one visit was counted as having three incident dyads and one  
28  
29 173 incident triad on the same date.

30  
31  
32 174 Incidence rates were reported separately by age (using seven age strata or  
33  
34 175 splitting the entire population in 0-64 and  $\geq 65$  years), sex, and ethnicity, and were  
35  
36 176 directly standardized by age and sex to the total US 2010 Decennial Census after  
37  
38 177 removing projected prevalence (see Supplementary Table B). Because the study  
39  
40 178 covered the target population completely, and no sampling was involved, confidence  
41  
42 179 intervals were not included in the tables.<sup>25,26</sup> Ethnicity data were not available for 9,176  
43  
44 180 people (7.4% of the cohort). These individuals were included in the overall and age-  
45  
46 181 and sex-specific analyses, but not in the ethnicity-specific analyses.



1  
2  
3 182 Although the 20 conditions proposed by the US-DHHS represent a national  
4  
5 183 consensus,<sup>15</sup> some of the conditions may have a different prognostic impact than  
6  
7  
8 184 others. For example, hyperlipidemia and hypertension often occur together and tend to  
9  
10 185 remain asymptomatic. Therefore, we performed a set of sensitivity analyses combining  
11  
12 186 hyperlipidemia and hypertension as a single chronic condition. The date of incidence  
13  
14 187 for the single chronic condition of hyperlipidemia and/or hypertension was defined as  
15  
16 188 the date the person first met criteria for either of these conditions.  
17  
18  
19  
20 189

## 21 22 190 **RESULTS**

### 23 24 25 191 **Description of the Olmsted County population**

26  
27  
28 192 The REP Census identified 129,311 Olmsted County, MN residents on January 1, 2000  
29  
30 193 compared with 124,277 individuals counted by the 2000 US Census (104.1%); 123,716  
31  
32 194 persons provided Minnesota research authorization for medical record research (95.7%)  
33  
34 195 and were included in our analyses. A total of 17,655 people (14.3%) had 2 or more  
35  
36 196 conditions at the baseline date and 9,368 (7.6%) had 3 or more conditions (prevalent  
37  
38 197 multimorbidity). Overall, we observed a total of 1,334,906 person-years of follow-up;  
39  
40 198 **however, as expected**, the length of follow-up varied by age group. For example,  
41  
42 199 median follow-up was 13.1 years in persons aged 0 to 19 years at baseline, 12.3 years  
43  
44 200 in persons aged 70 to 79 years at baseline, and 4.9 years in persons aged 80 years or  
45  
46 201 older at baseline.  
47  
48  
49  
50  
51

52 202 Figure 1 and Supplementary Table C report the incidence of each of the 20  
53  
54 203 chronic conditions considered separately by age and sex. The incidence of most of the  
55  
56 204 chronic conditions increased steeply with older age. However, the incidence of asthma,  
57  
58  
59  
60

1  
2  
3 205 substance abuse disorders, hepatitis, autism spectrum disorder, and infection with  
4  
5 206 human immunodeficiency virus was higher in the younger population compared to  
6  
7  
8 207 persons older than 60 years. The incidence of depression increased from ages 0-19 to  
9  
10 208 20-39 years, declined from 40-49 to 60-69 years, and increased sharply again  
11  
12 209 thereafter. The incidence of most conditions was higher in men compared to women of  
13  
14 210 the same age; however, women had a higher incidence of depression, arthritis, asthma,  
15  
16 211 and osteoporosis. The incidence curves in men and women crossed at age 50-59  
17  
18 212 years for cancer and at age 60-69 years for chronic obstructive pulmonary disease  
19  
20 213 (Figure 1).  
21  
22  
23  
24  
25  
26

## 27 215 **Incidence of multimorbidity by age, sex, and ethnicity**

28  
29  
30 216 Figure 2 shows the age-specific incidence rates of multimorbidity in men and women  
31  
32 217 separately (panels A and C), and in three ethnic groups (panels B and D). Both the  
33  
34 218 incidence of 2 chronic conditions and the incidence of 3 chronic conditions increased  
35  
36 219 steeply with older age (Table 1, Table 2, and Figure 2). For example, the incidence of 2  
37  
38 220 chronic conditions in men was 6.5/1,000 person-years in persons who were ages 0-19  
39  
40 221 years, and 260.0/1,000 in persons who were  $\geq 80$  years. The overall incidence of 2  
41  
42 222 chronic conditions was slightly higher in women compared to men (overall standardized  
43  
44 223 incidence rates 38.8 vs. 35.5/1,000 person-years; Table 1). The incidence of 2 chronic  
45  
46 224 conditions was higher in Blacks compared to Whites, but lower in Asians compared to  
47  
48 225 Whites (see standardized incidence rates in Table 1 and Figure 2). We observed  
49  
50 226 similar patterns for the development of 3 chronic conditions (see standardized incidence  
51  
52 227 rates in Table 2 and Figure 2). The overall incidence of 3 conditions was similar in men  
53  
54  
55  
56  
57  
58  
59  
60

1  
2  
3 228 and women (standardized incidence rates 25.5/1,000 person-years in men vs.  
4  
5 229 26.6/1,000 person-years in women); however, it was higher in Blacks and lower in  
6  
7  
8 230 Asians, compared to Whites (Figure 2).  
9

10 231 In the set of sensitivity analyses in which we combined hyperlipidemia and  
11  
12 232 hypertension as a single condition, we observed a slight decrease in the incidence of 2  
13  
14 233 chronic conditions and of 3 chronic conditions compared with the primary analyses.  
15  
16 234 The overall incidence rate of 2 conditions decreased from 35.0 to 34.0/1,000 person-  
17  
18 235 years in men and from 40.3 to 40.0/1,000 person-years in women. The incidence rate  
19  
20 236 of 3 conditions decreased from 24.7 to 22.5/1,000 person-years in men and from 28.5 to  
21  
22 237 27.0/1,000 person-years in women (incidence rates non-standardized; data not shown  
23  
24 238 in the Tables). For both 2 and 3 conditions, the decrease in incidence was more  
25  
26 239 sizeable in men than in women.  
27  
28  
29  
30  
31  
32  
33

## 34 241 **Incidence of dyads and triads**

35  
36  
37 242 Table 3 shows the incidence of the most common dyads or triads of chronic conditions  
38  
39 243 in seven age strata and for men and women separately. **As expected**, the incidence of  
40  
41 244 dyads and triads varied extensively with age. For example, the most common incident  
42  
43 245 dyad in persons 0-19 years was depression and asthma (1.8/1,000 person-years in  
44  
45 246 boys or men and 2.9/1,000 person-years in girls or women). By comparison, the most  
46  
47 247 common dyad in persons  $\geq 80$  years was hypertension and cancer in men (18.9/1,000  
48  
49 248 person-years) and hypertension and arthritis in women (27.7/1,000 person-years).  
50  
51 249 Similarly, the most common incident triad of conditions in persons aged 0-19 years was  
52  
53 250 depression, asthma, and substance abuse disorders in both sexes. By comparison, the  
54  
55  
56  
57  
58  
59  
60

1  
2  
3 251 most common incident triads in persons  $\geq 80$  years were hypertension, cancer, and  
4  
5 252 arrhythmia in men and hyperlipidemia, hypertension, and arthritis in women.

6  
7  
8 253 **As expected**, the incidence of dyads and triads also varied by sex. In some  
9  
10 254 instances, the composition of the dyads or triads was the same for men and women, but  
11  
12 255 the magnitude of the incidence rate was different. In other instances, the magnitude of  
13  
14 256 the incidence rate was similar in men and women, but the composition of the dyads and  
15  
16 257 triads varied by sex. For example, the most common incident dyad in persons aged 60-  
17  
18 258 69 years was hyperlipidemia and hypertension in both sexes, but the incidence rate was  
19  
20 259 higher in men compared to women (23.4/1,000 person-years vs. 18.8/1,000 person-  
21  
22 260 years). By contrast, the incidence rates of the most common triads in persons aged 60-  
23  
24 261 69 years were similar in men and women (11.6/1,000 vs. 10.3/1,000 person-years);  
25  
26 262 however, they included different conditions (Table 3).  
27  
28  
29  
30  
31

32 263

## 33 34 264 **DISCUSSION**

### 35 36 37 265 **Statement of the principal findings**

38  
39 266 The burden of multimorbidity in the United States is high and is increasing with an aging  
40  
41 267 population and with improvements in survival. We leveraged a unique longitudinal data  
42  
43 268 resource covering an entire, stable, and geographically defined population to examine  
44  
45 269 the incidence of multimorbidity across all ages. The incidence of 2 chronic conditions  
46  
47 270 and the incidence of 3 chronic conditions increased steeply with older age, and the  
48  
49 271 overall risk was similar in men and women. However, the number of people who  
50  
51 272 developed multimorbidity before age 65 was more than four times greater than the  
52  
53 273 number of people who developed multimorbidity after age 65. The incidence of  
54  
55  
56  
57  
58  
59  
60

1  
2  
3 274 multimorbidity was highest in Blacks, and lowest in Asians. Finally, **as expected**, the  
4  
5 275 combinations of conditions in incident dyads and triads differed extensively by age and  
6  
7  
8 276 by sex. These results have important implications for identifying individuals at higher  
9  
10 277 risk of developing multimorbidity at different ages. These data are also a first step  
11  
12 278 toward understanding the causes and the consequences of multimorbidity.  
13  
14  
15 279

## 18 280 **Strengths and limitations**

19  
20 281 A unique strength of our study was the ability to measure the incidence of multimorbidity  
21  
22 282 documented in medical records across seven age groups and for an entire,  
23  
24 283 geographically defined population. We used historical data both to exclude individuals  
25  
26 284 with prevalent multimorbidity at baseline and to follow individuals over a long period of  
27  
28 285 time to accurately document the development of incident multimorbidity. In total, our  
29  
30 286 findings reflect 19 years of data accumulation (5 years before and 14 years after the  
31  
32 287 baseline date).  
33  
34  
35

36  
37 288 Unfortunately, there is no standard definition of multimorbidity. Previous studies  
38  
39 289 have included a wide range of chronic conditions and a wide range of time frames. We  
40  
41 290 defined multimorbidity using the 20 conditions selected by US-DHHS which were  
42  
43 291 chosen because they “meet the definition for chronicity, are prevalent [common], and  
44  
45 292 are potentially amenable to public health or clinical interventions or both.”<sup>23</sup> However,  
46  
47 293 this definition provides equal weight to each of the 20 conditions without considering the  
48  
49 294 impact of combinations of specific conditions on the quality of life of patients, the  
50  
51 295 complexity of their joint management, and the severity of their long-term outcomes. **In**  
52  
53  
54 296 **addition, this list does not include a number of conditions that may have a**  
55  
56  
57  
58  
59  
60

1  
2  
3 297 **significant impact on the burden of multimorbidity in older subjects (e.g., hearing**  
4  
5 **and vision problems). Such conditions should be considered in future studies of**  
6 298  
7  
8 299 **multimorbidity. By contrast, the list includes some conditions that were less**  
9  
10 **common in the general population. For example, autism appeared as part of an**  
11 300  
12 **incident dyad in only 31 persons, and HIV infection in only 41 persons.**  
13 301  
14  
15 302 **Therefore, further efforts are needed to refine the list of the most relevant**  
16  
17 **conditions to study multimorbidity, recognizing that the most relevant conditions**  
18 303  
19 **will vary depending on the age and sex of the population.**  
20 304

21  
22 305 Some of the dyads and triads derived by the combination of the 20 conditions  
23  
24 306 selected by the US-DHHS may have a much stronger impact on the complexity of  
25  
26 307 clinical management than others.<sup>27</sup> Therefore, some dyads or triads may be  
27  
28 308 particularly costly for the health system, harder for the patient to manage by  
29  
30 309 themselves, less amenable to a single disease approach to care (e.g., telemonitoring for  
31  
32 310 heart failure), and may have a stronger effect on functionality, severity of symptoms,  
33  
34 311 and risk of death. In addition, social factors (e.g., inadequate insurance, low education)  
35  
36 312 and behavioral factors (e.g., poor diet) not reflected in the list of 20 US-DHHS  
37  
38 313 conditions may be as important, or more important, than the 20 conditions in  
39  
40 314 determining the complexity of clinical management and long-term outcomes.<sup>27</sup>  
41  
42  
43  
44  
45

46 315 For example, because hyperlipidemia and hypertension are typically  
47  
48 316 asymptomatic, and are often diagnosed as the result of routine screening, their  
49  
50 317 combination is likely to have a much lower impact on the life of the patient than the  
51  
52 318 combination of schizophrenia and heart failure. However, both combinations are  
53  
54 319 considered multimorbidity by the US-DHHS definition. Our sensitivity analyses highlight  
55  
56  
57  
58  
59  
60

1  
2  
3 320 this problem. As expected, when hyperlipidemia and hypertension were considered as  
4  
5  
6 321 a single condition, the overall incidence of multimorbidity decreased. The decreases  
7  
8 322 were relatively small but were more sizeable in men than in women. These findings  
9  
10 323 emphasize the importance of reaching consensus on the list of conditions to be used to  
11  
12 324 define multimorbidity. However, it is difficult to assess the utility of the 20 conditions  
13  
14  
15 325 included in the US-DHHS list without also understanding how different combinations of  
16  
17 326 these conditions impact long term outcomes. Therefore, we plan to continue this initial  
18  
19  
20 327 incidence study with further analyses to assess which combinations of conditions have  
21  
22 328 the greatest impact on adverse outcomes, including patient quality of life and complexity  
23  
24 329 of clinical management.<sup>27</sup>

25  
26  
27 330 We defined incident multimorbidity as the date on which a person met the criteria  
28  
29 331 for a second condition or for a third condition. We used an approach similar to that  
30  
31 332 used in the definition for the onset of metabolic syndrome (reaching three of five  
32  
33 333 components of the syndrome).<sup>28,29</sup> This simple operational definition of incident  
34  
35 334 multimorbidity should be easy to replicate, and should facilitate future comparisons with  
36  
37 335 other populations.

38  
39  
40 336 Potential limitations of our study include the inability to validate the ICD-9 codes.  
41  
42 337 It was not possible to confirm all diagnoses for the entire study population, and some  
43  
44 338 ICD-9 codes may have been assigned in error (e.g., “rule out” diagnostic codes). To  
45  
46 339 reduce the likelihood of a single ICD-9 code error, we required two or more diagnosis  
47  
48 340 codes separated by more than 30 days for a person to be defined as having a condition.  
49  
50  
51 341<sup>30</sup> However, if a person received a valid code and was lost to follow-up or died rapidly  
52  
53 342 after diagnosis, we may have underestimated the incidence of some of the conditions.  
54  
55  
56  
57  
58  
59  
60

1  
2  
3 343 In addition, we used diagnosis date as a proxy for the true date of onset of the  
4  
5 344 condition.

6  
7  
8 345 Some individuals may have moved into Olmsted County after having been  
9  
10 346 diagnosed with one or more chronic conditions elsewhere. If those persons continued  
11  
12 347 to receive care within the REP for a number of years, we captured their chronic  
13  
14 348 condition at the time of subsequent health care visits. However, we did not know the  
15  
16 349 true date of onset for the condition, and the sequence of accumulation of conditions  
17  
18 350 could be distorted. Because the population of Olmsted County is stable, particularly  
19  
20 351 among persons who are 40 years of age or older,<sup>19</sup> we do not expect a major distortion  
21  
22 352 of the multimorbidity incidence rates observed in this study due to migration.  
23  
24  
25  
26

27 353 Finally, our study focused on a single geographically defined US population, and  
28  
29 354 the incidence of multimorbidity may differ in other populations. However, the  
30  
31 355 demographic and socioeconomic characteristics of our population are similar to those of  
32  
33 356 the upper Midwest of the United States,<sup>20</sup> and the prevalence of multimorbidity in  
34  
35 357 persons 65 years of age or older was similar in our population compared with the entire  
36  
37 358 US Medicare population.<sup>16</sup> Replication of this study in other populations in the United  
38  
39 359 States and worldwide will allow for useful comparisons.<sup>31</sup>  
40  
41  
42  
43  
44  
45

46

## 46 361 **Comparison with other studies**

47  
48  
49 362 A number of studies have described the prevalence of multimorbidity in various  
50  
51 363 populations;<sup>1,7-12</sup> however, few studies have described the incidence of multimorbidity,  
52  
53 364 and no incidence studies are available for the US. In 1998, Van den Akker and  
54  
55 365 colleagues estimated the one year incidence of multimorbidity in patients from a  
56  
57  
58  
59  
60



1  
2  
3 366 network of family practices in the Netherlands.<sup>32</sup> Incident multimorbidity was defined as  
4  
5 367 the new development of at least 2 of 335 diagnostic categories within a one year period.  
6  
7  
8 368 Overall, 7.9% of their population developed one new disease and 1.3% developed two  
9  
10 369 or more new diseases in one year. The proportion of people who developed two or  
11  
12 370 more new conditions increased with older age, but did not differ substantially by sex. It  
13  
14 371 is difficult to compare our results directly to the Dutch findings because of  
15  
16 372 methodological differences (e.g., number of conditions considered and time frame), and  
17  
18 373 because it is not clear whether some of the participants in the Dutch study already had  
19  
20 374 one or more conditions at baseline. However, we observed similar patterns of  
21  
22 375 increasing incidence with older age, and limited differences between men and women in  
23  
24 376 overall incidence.  
25  
26  
27  
28

29 377 More recently, Melis and colleagues assessed the incidence of multimorbidity in  
30  
31 378 Swedish people aged 75 years or older at baseline who participated in a longitudinal  
32  
33 379 cohort study.<sup>33</sup> Incident multimorbidity was defined as the development of at least 2 of  
34  
35 380 39 chronic conditions during three years of follow-up. Participants with none of the 39  
36  
37 381 chronic conditions at baseline had a multimorbidity incidence rate of 12.6 per 100  
38  
39 382 person-years, and patients with one of the 39 conditions at baseline had an incidence  
40  
41 383 rate of 32.9 per 100 person-years. Although we examined fewer conditions than the  
42  
43 384 Swedish group (20 vs. 39), and the ascertainment of incident conditions was different  
44  
45 385 (medical records data vs. survey methods), our incidence rates of multimorbidity in  
46  
47 386 subjects aged 75 years or older were similar (19.1 per 100 person-years in people with  
48  
49 387 no conditions at baseline and 38.9 per 100 person-years in persons with one condition  
50  
51 388 at baseline; both sexes combined; data not shown).  
52  
53  
54  
55  
56  
57  
58  
59  
60

389

## 390 **Meaning of the study**

391 To understand the importance of these findings, we draw an analogy with the difference  
392 between prevalence and incidence in epidemiologic studies considering one disease at  
393 a time.<sup>34,35</sup> Incidence is the direct measure of the risk of people to develop a given  
394 disease, whereas prevalence is the percent of people affected by the same disease at  
395 one point in time, and reflects both the effect of incidence and the effect of survival after  
396 the onset of the disease.<sup>34,35</sup> Similarly, the prevalence of multimorbidity gives us a  
397 static picture of the population; however, prevalence may be misleading when studying  
398 the mechanisms of multimorbidity. For example, a higher prevalence of multimorbidity  
399 in women than in men may be due to a higher risk of women developing multimorbidity,  
400 or to a longer survival of women affected by multimorbidity.<sup>16</sup> **Similarly, studying**  
401 **outcomes among persons with prevalent multimorbidity may be clinically**  
402 **relevant, but may not clarify the outcomes of multimorbidity at the population**  
403 **level (e.g., survival bias and inability to study the effect of the duration of**  
404 **multimorbidity).**

405 Prior studies of the prevalence of multimorbidity have shown a dramatic increase  
406 in the number of people living with 2 or more chronic conditions at older ages.<sup>1,7-11</sup>  
407 However, the high prevalence of multimorbidity in the older population implies that  
408 relatively few older individuals remain at risk of developing multimorbidity. Overall,  
409 among persons aged 80 years or older at baseline, only 891 out of 3,710 (24.0%) were  
410 at risk of developing 2 chronic conditions (the other 76.0% already had 2 or more of the  
411 20 conditions). Although the persons who reached 80 years of age or older and

1  
2  
3 412 **remained free of multimorbidity were a particularly resilient group, they had a**  
4  
5 413 **higher risk of developing subsequent multimorbidity than younger persons.**  
6  
7

8 414 We also found that the total number of people who developed multimorbidity  
9  
10 415 before age 65 years was more than 4 times greater than the number of people who  
11  
12 416 developed multimorbidity at ages 65 or older (28,378 vs. 6,214). These data emphasize  
13  
14 417 the need to target preventive efforts at much younger ages, but represent only a first  
15  
16 418 step toward future research to identify the social, behavioral, and clinical risk and  
17  
18 419 protective factors for multimorbidity.  
19  
20

21  
22 420 We found important differences in the incidence of multimorbidity by ethnicity.  
23  
24 421 The age standardized incidence rates of multimorbidity were higher in Blacks and lower  
25  
26 422 in Asians compared to Whites. Our findings are consistent with previous studies that  
27  
28 423 showed a higher prevalence of multimorbidity in Blacks compared to Whites, but a lower  
29  
30 424 prevalence of multimorbidity in Asians.<sup>8,16,36-38</sup> Our data suggest that some of these  
31  
32 425 differences in prevalence may be attributed to differences in the incidence of the  
33  
34 426 conditions among different ethnic groups. However, differential survival may also  
35  
36 427 contribute to the differences in prevalence. In turn, both differences in incidence and in  
37  
38 428 prevalence may be influenced by socioeconomic factors, lifestyle behaviors, social  
39  
40 429 environment, and healthcare access. Further research is needed to better characterize  
41  
42 430 these disparities and to identify the causal mechanisms that contribute to different  
43  
44 431 development of chronic conditions and to different survival.  
45  
46  
47  
48  
49

50 432 **As expected**, the incidence and the composition of the dyads and triads of  
51  
52 433 conditions varied extensively across age and sex strata. For example, women 20 years  
53  
54 434 of age or older were more likely to have depression as a component of their incident  
55  
56  
57  
58  
59  
60

1  
2  
3 435 multimorbidity dyads and triads compared to men. Such differences may lead to  
4  
5  
6 436 different long-term outcomes in men and women. Therefore, these data are useful to  
7  
8 437 understand how multimorbidity develops, and are an important first step toward future  
9  
10 438 research. In particular, such incident data are necessary to study the chronological  
11  
12 439 order of acquisition of multiple chronic conditions in different age, sex, and ethnic strata.  
13  
14  
15 440 Incidence data are also necessary to determine whether the differential order of  
16  
17 441 acquisition is associated with a different risk of adverse long-term outcomes such as  
18  
19 442 hospitalizations, emergency department visits, or death. For example, it is not clear  
20  
21 443 whether acquiring depression prior to arthritis results in worse long-term outcomes  
22  
23 444 compared with acquiring arthritis prior to depression. Future studies are also needed to  
24  
25 445 understand how additional chronic conditions accumulate after the development of a  
26  
27 446 second and third condition. **Finally, the incidence of specific dyads and triads**  
28  
29 **reflects the incidence of the individual conditions in specific age and sex groups.**  
30  
31 **Many of these dyads and triads are expected to develop simply by chance.**  
32  
33 **Therefore, future studies are needed to identify the dyads and triads that co-**  
34  
35 **occur beyond chance. Identification of incident dyads and triads that reflect**  
36  
37 **shared etiologic mechanisms or shared risk factors may lead to combined**  
38  
39 **treatment or prevention strategies.**  
40  
41  
42  
43  
44  
45  
46  
47  
48  
49

## 50 **Conclusions and clinical implications**

51 455 It is important and urgent to understand the causes and the consequences of  
52  
53 456 multimorbidity to inform efforts to delay and prevent disease onset and to develop  
54  
55 457 effective strategies for caring for patients with multimorbidity. We studied the incidence  
56  
57  
58  
59  
60

1  
2  
3 458 of multimorbidity across all ages, separately in men and women, and in three ethnic  
4  
5  
6 459 groups in a geographically defined US population. The incidence of multimorbidity  
7  
8 460 increased steeply with older age and was higher in Blacks but lower in Asians  
9  
10 461 compared to Whites. Men and women had a similar overall risk, but the combinations  
11  
12 462 of conditions within dyads and triads varied extensively by age and by sex. These data  
13  
14 463 represent an important first step toward **identifying conditions which co-occur more**  
15  
16 **frequently than chance alone, identifying** specific risk factors for multimorbidity,  
17 464  
18 understanding how chronic conditions accumulate over time, and toward identifying  
19 465  
20 **combinations of conditions that predict** adverse outcomes.  
21 466  
22  
23  
24  
25  
26  
27  
28  
29  
30  
31  
32  
33  
34  
35  
36  
37  
38  
39  
40  
41  
42  
43  
44  
45  
46  
47  
48  
49  
50  
51  
52  
53  
54  
55  
56  
57  
58  
59  
60

1  
2  
3 467 **Competing interest declaration:**  
4

5  
6 468 All authors have completed the Unified Competing Interest form at  
7  
8  
9 469 [www.icmje.org/coi\\_disclosure.pdf](http://www.icmje.org/coi_disclosure.pdf) (available on request from the corresponding author)  
10  
11 470 and declare that (1) none of the authors have support from any companies for the  
12  
13 471 submitted work; (2) none of the authors have any relationships with any companies that  
14  
15 472 might have an interest in the submitted work in the previous 3 years; (3) their spouses,  
16  
17 473 partners, or children have no financial relationships that may be relevant to the  
18  
19 474 submitted work; and (4) none of the authors have any non-financial interests that may  
20  
21 475 be relevant to the submitted work.  
22  
23  
24  
25

26 476 **Contributorship statement:** Dr. St. Sauver had full access to all of the data in the  
27  
28 477 study and takes responsibility for the integrity of the data and the accuracy of the data  
29  
30 478 analysis. She is the guarantor for the study.  
31  
32  
33

34 479 *Study concept and design:* St. Sauver, Boyd, Grossardt, Yawn, Rocca.  
35  
36

37 480 *Acquisition, analysis, or interpretation of data:* St. Sauver, Grossardt, Rocca.  
38  
39

40 481 *Drafting of the manuscript:* St. Sauver, Rocca.  
41  
42

43 482 *Critical revision of the manuscript for important intellectual content:* St. Sauver, Boyd,  
44  
45 483 Grossardt, Bobo, Finney Rutten, Roger, Ebbert, Therneau, Yawn, and Rocca.  
46  
47  
48

49 484 *Statistical analysis:* Grossardt, Therneau.  
50  
51

52 485 *Obtained funding:* Yawn, Rocca.  
53  
54  
55

56 486 *Administrative, technical, or material support:* Yawn, Rocca.  
57  
58  
59  
60

1  
2  
3 487 *Study supervision:* Yawn, Rocca.  
4  
5

6 488 **Identifiable patients:** No identifiable patients were included.  
7  
8

9  
10 489 **Ethics approvals:** The study was approved by both the Mayo Clinic (IRB number  
11  
12 490 PR1945-99-08) and the Olmsted Medical Center (IRB number 016-OMC-11)  
13  
14 491 Institutional Review Boards. Because the study only involved review of patient medical  
15  
16 492 record information, the information used in this study was not deemed particularly  
17  
18 493 sensitive, the confidentiality of the information was protected, and the study could not  
19  
20 494 practicably be carried out if consent were required, both IRBs waived the requirement  
21  
22 495 for informed consent. However, we only used data from persons that had previously  
23  
24 496 provided a general authorization for their medical records to be used for research  
25  
26 497 (Minnesota Research Authorization).  
27  
28  
29  
30

31  
32 498 **All sources of funding:** This study was made possible using the resources of the  
33  
34 499 Rochester Epidemiology Project, which is supported by the National Institute on Aging  
35  
36 500 of the National Institutes of Health under Award Number R01AG034676. The content is  
37  
38 501 solely the responsibility of the authors and does not necessarily represent the official  
39  
40 502 views of the National Institutes of Health. This study was also supported by the Mayo  
41  
42 503 Clinic Robert D. and Patricia E. Kern Center for the Science of Health Care Delivery  
43  
44 504 Population Health Research Program. Dr. Boyd was supported by the Paul Beeson  
45  
46 505 Career Development Award Program (NIA K23 AG032910), the John A. Hartford  
47  
48 506 Foundation, Atlantic Philanthropies, the Starr Foundation, and an anonymous donor.  
49  
50  
51 507 The authors of this report are responsible for its content.  
52  
53  
54  
55  
56  
57  
58  
59  
60

1  
2  
3 508 **Role of the Sponsors:** The funders had no role in the design and conduct of the study;  
4  
5  
6 509 in the collection, analysis, and interpretation of the data; in the preparation, review, or  
7  
8 510 approval of the manuscript; or in the decision to submit the manuscript for publication.  
9

10  
11 511 **Independence of researchers:** All authors were independent from any funder or  
12  
13 512 company.  
14

15  
16  
17 513 **Responsibility for the integrity of the data:** All authors, external and internal, had full  
18  
19 514 access to all of the data (including statistical reports and tables) in the study and can  
20  
21 515 take responsibility for the integrity of the data and the accuracy of the data analysis.  
22  
23

24  
25 516 **Transparency declaration:** The lead author (the manuscript's guarantor, Dr. JLS)  
26  
27 517 affirms that the manuscript is an honest, accurate, and transparent account of the study  
28  
29 518 being reported; that no important aspects of the study have been omitted; and that any  
30  
31 519 discrepancies from the study as planned have been explained.  
32  
33

34  
35 520 **Data sharing:** No additional data available.  
36  
37

38 521 **Exclusive license:** I *Walter A. Rocca*, The Corresponding Author of this article  
39  
40 522 contained within the original manuscript which includes any diagrams & photographs  
41  
42 523 within and any related or stand alone film submitted (the Contribution") has the right to  
43  
44 524 grant on behalf of all authors and does grant on behalf of all authors, a licence to the  
45  
46 525 BMJ Publishing Group Ltd and its licencees, to permit this Contribution (if accepted) to  
47  
48 526 be published in the BMJ and any other BMJ Group products and to exploit all subsidiary  
49  
50 527 rights, as set out in our licence set out at: [http://www.bmj.com/about-bmj/resources-](http://www.bmj.com/about-bmj/resources-authors/forms-policies-and-checklists/copyright-open-access-and-permission-reuse)  
51  
52 528 [authors/forms-policies-and-checklists/copyright-open-access-and-permission-reuse.](http://www.bmj.com/about-bmj/resources-authors/forms-policies-and-checklists/copyright-open-access-and-permission-reuse)  
53  
54  
55 529



## REFERENCES

1. Salive ME. Multimorbidity in Older Adults. *Epidemiol Rev.* 2013;35(1):75-83.
2. Anderson G. Chronic Care: Making the case for ongoing care. 2010; <http://www.rwjf.org/en/research-publications/find-rwjf-research/2010/02/chronic-care.html>. Accessed June 4, 2014.
3. Vogeli C, Shields AE, Lee TA, et al. Multiple chronic conditions: prevalence, health consequences, and implications for quality, care management, and costs. *J Gen Intern Med.* 2007;22 Suppl 3:391-395.
4. Thorpe KE, Ogden LL, Galactionova K. Chronic conditions account for rise in Medicare spending from 1987 to 2006. *Health Aff (Millwood).* 2010;29(4):718-724.
5. Sinnott C, Mc Hugh S, Browne J, Bradley C. GPs' perspectives on the management of patients with multimorbidity: systematic review and synthesis of qualitative research. *BMJ Open.* 2013;3(9):e003610.
6. Boyd CM, Wolff JL, Giovannetti E, et al. Healthcare task difficulty among older adults with multimorbidity. *Med Care.* 2014;52 Suppl 3:S118-125.
7. Ward BW, Schiller JS. Prevalence of multiple chronic conditions among US adults: estimates from the National Health Interview Survey, 2010. *Prev Chronic Dis.* 2013;10:E65.
8. Lochner KA, Cox CS. Prevalence of multiple chronic conditions among Medicare beneficiaries, United States, 2010. *Prev Chronic Dis.* 2013;10:E61.
9. Ashman JJ, Beresovsky V. Multiple chronic conditions among US adults who visited physician offices: data from the National Ambulatory Medical Care Survey, 2009. *Prev Chronic Dis.* 2013;10:E64.

- 1  
2  
3 **10.** Prados-Torres A, Calderon-Larranaga A, Hanco-Saavedra J, Poblador-Plou B, van den  
4 Akker M. Multimorbidity patterns: a systematic review. *J Clin Epidemiol.* 2014;67(3):254-  
5 266.  
6  
7
- 8  
9 **11.** Barnett K, Mercer SW, Norbury M, Watt G, Wyke S, Guthrie B. Epidemiology of  
10 multimorbidity and implications for health care, research, and medical education: a  
11 cross-sectional study. *Lancet.* 2012;380(9836):37-43.  
12  
13
- 14 **12.** Weiss CO, Boyd CM, Yu Q, Wolff JL, Leff B. Patterns of prevalent major chronic disease  
15 among older adults in the United States. *JAMA.* 2007;298(10):1160-1162.  
16  
17
- 18 **13.** Smith SM, Soubhi H, Fortin M, Hudon C, O'Dowd T. Managing patients with  
19 multimorbidity: systematic review of interventions in primary care and community  
20 settings. *BMJ.* 2012;345:e5205.  
21  
22
- 23 **14.** Uhlig K, Leff B, Kent D, et al. A framework for crafting clinical practice guidelines that are  
24 relevant to the care and management of people with multimorbidity. *J Gen Intern Med.*  
25 2014;29(4):670-679.  
26  
27
- 28 **15.** *U.S. Department of Health and Human Services. Multiple Chronic Conditions - A  
29 Strategic Framework: Optimum Health and Quality of Life for Individuals with Multiple  
30 Chronic Conditions. Washington, D.C. December 2010.*  
31  
32
- 33 **16.** Rocca WA, Boyd CM, Grossardt BR, et al. The prevalence of multimorbidity in a  
34 geographically defined American population: patterns by age, sex, and ethnicity. *Mayo  
35 Clin Proc.* 2014;89(10):1336-1349.  
36  
37
- 38 **17.** Rocca WA, Yawn BP, St Sauver JL, Grossardt BR, Melton LJ, 3rd. History of the  
39 Rochester Epidemiology Project: half a century of medical records linkage in a US  
40 population. *Mayo Clin Proc.* 2012;87(12):1202-1213.  
41  
42
- 43 **18.** St Sauver JL, Grossardt BR, Yawn BP, Melton LJ, 3rd, Rocca WA. Use of a medical  
44 records linkage system to enumerate a dynamic population over time: the Rochester  
45 Epidemiology Project. *Am J Epidemiol.* 2011;173(9):1059-1068.  
46  
47  
48  
49  
50  
51  
52  
53  
54  
55  
56  
57  
58  
59  
60

- 1  
2  
3  
4  
5  
6  
7  
8  
9  
10  
11  
12  
13  
14  
15  
16  
17  
18  
19  
20  
21  
22  
23  
24  
25  
26  
27  
28  
29  
30  
31  
32  
33  
34  
35  
36  
37  
38  
39  
40  
41  
42  
43  
44  
45  
46  
47  
48  
49  
50  
51  
52  
53  
54  
55  
56  
57  
58  
59  
60
19. St Sauver JL, Grossardt BR, Yawn BP, et al. Data resource profile: the Rochester Epidemiology Project (REP) medical records-linkage system. *Int J Epidemiol.* 2012;41(6):1614-1624.
20. St Sauver JL, Grossardt BR, Leibson CL, Yawn BP, Melton LJ, 3rd, Rocca WA. Generalizability of epidemiological findings and public health decisions: an illustration from the Rochester Epidemiology Project. *Mayo Clin Proc.* 2012;87(2):151-160.
21. Yawn BP, Yawn RA, Geier GR, Xia Z, Jacobsen SJ. The impact of requiring patient authorization for use of data in medical records research. *J Fam Pract.* 1998;47(5):361-365.
22. Jacobsen SJ, Xia Z, Campion ME, et al. Potential effect of authorization bias on medical record research. *Mayo Clin Proc.* 1999;74(4):330-338.
23. Goodman RA, Posner SF, Huang ES, Parekh AK, Koh HK. Defining and measuring chronic conditions: imperatives for research, policy, program, and practice. *Prev Chronic Disease.* 2013;10:E66.
24. Cohen JW, Cohen SB, Banthin JS. The medical expenditure panel survey: a national information resource to support healthcare cost research and inform policy and practice. *Med Care.* 2009;47(7 Suppl 1):S44-50.
25. Anderson DW, Mantel N. On epidemiologic surveys. *Am J Epidemiol.* 1983;118(5):613-619.
26. Deming WE. Boundaries of Statistical Inference. In: Smith H, Johnson NL, eds. *New Developments in Survey Sampling.* New York: Wiley-Interscience; 1969:652-670.
27. Grant RW, Ashburner JM, Hong CS, Chang Y, Barry MJ, Atlas SJ. Defining patient complexity from the primary care physician's perspective: a cohort study. *Ann Intern Med.* 2011;155(12):797-804.

- 1  
2  
3  
4  
5  
6  
7  
8  
9  
10  
11  
12  
13  
14  
15  
16  
17  
18  
19  
20  
21  
22  
23  
24  
25  
26  
27  
28  
29  
30  
31  
32  
33  
34  
35  
36  
37  
38  
39  
40  
41  
42  
43  
44  
45  
46  
47  
48  
49  
50  
51  
52  
53  
54  
55  
56  
57  
58  
59  
60
28. Palaniappan L, Carnethon MR, Wang Y, et al. Predictors of the incident metabolic syndrome in adults: the Insulin Resistance Atherosclerosis Study. *Diabetes Care*. 2004;27(3):788-793.
29. Hadaegh F, Hasheminia M, Lotfaliany M, Mohebi R, Azizi F, Tohidi M. Incidence of metabolic syndrome over 9 years follow-up; the importance of sex differences in the role of insulin resistance and other risk factors. *PloS One*. 2013;8(9):e76304.
30. Hebert PL, Geiss LS, Tierney EF, Engelgau MM, Yawn BP, McBean AM. Identifying persons with diabetes using Medicare claims data. *Am J Med Qual*. 1999;14(6):270-277.
31. Posner SF, Goodman RA. Multimorbidity at the local level: Implications and research directions. *Mayo Clin Proc*. 2014;89(10):1321-1323.
32. van den Akker M, Buntinx F, Metsemakers JF, Roos S, Knottnerus JA. Multimorbidity in general practice: prevalence, incidence, and determinants of co-occurring chronic and recurrent diseases. *J Clin Epidemiol*. 1998;51(5):367-375.
33. Melis R, Marengoni A, Angleman S, Fratiglioni L. Incidence and predictors of multimorbidity in the elderly: a population-based longitudinal study. *PloS One*. 2014;9(7):e103120.
34. Porta MS, International Epidemiological Association. *A Dictionary of Epidemiology*. 5th ed. Oxford; New York: Oxford University Press; 2008.
35. Szklo M, Nieto FJ. *Epidemiology: Beyond the Basics*. 2nd ed. Sudbury: Jones and Bartlett Publishers; 2007.
36. Steiner CA, Friedman B. Hospital utilization, costs, and mortality for adults with multiple chronic conditions, Nationwide Inpatient Sample, 2009. *Prev Chronic Dis*. 2013;10:E62.
37. Machlin SR, Soni A. Health care expenditures for adults with multiple treated chronic conditions: estimates from the Medical Expenditure Panel Survey, 2009. *Prev Chronic Dis*. 2013;10:E63.

- 1  
2  
3  
4  
5  
6  
7  
8  
9  
10  
11  
12  
13  
14  
15  
16  
17  
18  
19  
20  
21  
22  
23  
24  
25  
26  
27  
28  
29  
30  
31  
32  
33  
34  
35  
36  
37  
38  
39  
40  
41  
42  
43  
44  
45  
46  
47  
48  
49  
50  
51  
52  
53  
54  
55  
56  
57  
58  
59  
60
- 38.** Quinones AR, Liang J, Bennett JM, Xu X, Ye W. How does the trajectory of multimorbidity vary across Black, White, and Mexican Americans in middle and old age? *J Gerontol B Psychol Sci Soc Sci.* 2011;66(6):739-749.

For peer review only

**Table 1.** Incidence of the second of two chronic conditions (per 1,000 person-years) in persons living in Olmsted County, MN by age, sex, and ethnicity.

| Ethnicity<br>age (years) | Men     |                  |                        | Women   |                  |                        |
|--------------------------|---------|------------------|------------------------|---------|------------------|------------------------|
|                          | Persons | Person-<br>years | Incidence<br>rate* (n) | Persons | Person-<br>years | Incidence<br>rate* (n) |
| <b>All ethnic groups</b> |         |                  |                        |         |                  |                        |
| 0-19                     | 18,879  | 140,653          | 6.5 (921)              | 18,024  | 134,725          | 8.5 (1,151)            |
| 20-39                    | 27,732  | 151,734          | 17.2 (2,613)           | 28,571  | 158,252          | 25.1 (3,972)           |
| 40-49                    | 16,396  | 82,324           | 43.6 (3,590)           | 16,713  | 85,660           | 45.8 (3,920)           |
| 50-59                    | 11,779  | 52,085           | 85.2 (4,436)           | 12,398  | 55,270           | 84.6 (4,674)           |
| 60-69                    | 5,218   | 19,653           | 139.4 (2,739)          | 5,603   | 21,246           | 135.3 (2,874)          |
| 70-79                    | 1,775   | 5,451            | 209.9 (1,144)          | 2,184   | 6,660            | 202.0 (1,345)          |
| ≥ 80                     | 531     | 1,589            | 260.0 (413)            | 1,016   | 2,887            | 277.1 (800)            |
| 0-64                     | 50,648  | 439,254          | 29.7 (13,059)          | 51,056  | 447,399          | 34.2 (15,319)          |
| ≥ 65                     | 3,794   | 14,236           | 196.5 (2,797)          | 4,636   | 17,300           | 197.5 (3,417)          |
| All ages                 | 52,479  | 453,489          | 35.0 (15,856)          | 53,582  | 464,699          | 40.3 (18,736)          |
| Standardized†            | ---     | ---              | 35.5                   | ---     | ---              | 38.8                   |
| <b>Blacks</b>            |         |                  |                        |         |                  |                        |
| 0-19                     | 877     | 6,411            | 5.5 (35)               | 749     | 5,362            | 6.0 (32)               |
| 20-39                    | 1,099   | 6,178            | 16.5 (102)             | 934     | 5,647            | 23.0 (130)             |
| 40-49                    | 429     | 1,836            | 63.2 (116)             | 324     | 1,392            | 61.8 (86)              |
| 50-59                    | 180     | 683              | 105.3 (72)             | 139     | 513              | 121.0 (62)             |
| 60-69                    | 60      | 223              | 134.8 (30)             | 47      | 150              | 193.2 (29)             |
| 70-79                    | 18      | 71               | 140.1 (10)             | 23      | 60               | 200.4 (12)             |
| ≥ 80                     | 4       | 11               | 274.0 (3)              | 3       | 5                | 580.3 (3)              |
| 0-64                     | 1,848   | 15,240           | 22.0 (335)             | 1,563   | 13,010           | 25.5 (332)             |
| ≥ 65                     | 48      | 173              | 190.8 (33)             | 37      | 118              | 185.7 (22)             |
| All ages                 | 1,873   | 15,413           | 23.9 (368)             | 1,587   | 13,128           | 27.0 (354)             |
| Standardized†            | ---     | ---              | 38.9                   | ---     | ---              | 48.5                   |
| <b>Asians</b>            |         |                  |                        |         |                  |                        |
| 0-19                     | 818     | 6,331            | 3.5 (22)               | 826     | 6,299            | 5.6 (35)               |
| 20-39                    | 1,090   | 6,372            | 15.1 (96)              | 1,168   | 7,167            | 14.6 (105)             |
| 40-49                    | 534     | 2,464            | 39.8 (98)              | 591     | 2,869            | 33.8 (97)              |
| 50-59                    | 339     | 1,588            | 71.8 (114)             | 376     | 1,687            | 79.4 (134)             |
| 60-69                    | 159     | 592              | 120.0 (71)             | 185     | 570              | 161.3 (92)             |
| 70-79                    | 51      | 163              | 140.8 (23)             | 74      | 177              | 271.6 (48)             |
| ≥ 80                     | 21      | 60               | 216.6 (13)             | 40      | 92               | 358.1 (33)             |
| 0-64                     | 1,897   | 17,137           | 21.6 (370)             | 1,997   | 18,399           | 23.3 (429)             |
| ≥ 65                     | 114     | 433              | 154.7 (67)             | 159     | 463              | 248.4 (115)            |
| All ages                 | 1,954   | 17,571           | 24.9 (437)             | 2,105   | 18,862           | 28.8 (544)             |
| Standardized†            | ---     | ---              | 29.5                   | ---     | ---              | 34.9                   |
| <b>Whites</b>            |         |                  |                        |         |                  |                        |
| 0-19                     | 14,956  | 119,686          | 6.8 (818)              | 14,414  | 114,906          | 9.0 (1,032)            |
| 20-39                    | 21,792  | 128,801          | 17.9 (2,303)           | 23,214  | 135,903          | 26.5 (3,599)           |
| 40-49                    | 14,426  | 74,921           | 43.6 (3,269)           | 15,088  | 79,123           | 46.1 (3,646)           |
| 50-59                    | 10,795  | 48,361           | 85.8 (4,149)           | 11,520  | 51,901           | 84.8 (4,399)           |

Table 1. Continued

| Ethnicity<br>age (years) | Men     |                  |                        | Women   |                  |                        |
|--------------------------|---------|------------------|------------------------|---------|------------------|------------------------|
|                          | Persons | Person-<br>years | Incidence<br>rate* (n) | Persons | Person-<br>years | Incidence<br>rate* (n) |
| 60-69                    | 4,823   | 18,362           | 140.4 (2,578)          | 5,221   | 20,075           | 134.7 (2,704)          |
| 70-79                    | 1,653   | 5,090            | 212.6 (1,082)          | 2,030   | 6,301            | 200.9 (1,266)          |
| ≥ 80                     | 497     | 1,495            | 262.8 (393)            | 953     | 2,754            | 274.5 (756)            |
| 0-64                     | 40,703  | 383,410          | 31.2 (11,952)          | 42,149  | 394,566          | 35.9 (14,170)          |
| ≥ 65                     | 3,517   | 13,306           | 198.4 (2,640)          | 4,317   | 16,398           | 197.1 (3,232)          |
| All ages                 | 42,382  | 396,716          | 36.8 (14,592)          | 44,465  | 410,964          | 42.3 (17,402)          |
| Standardized†            | ---     | ---              | 36.0                   | ---     | ---              | 39.4                   |

\* Incidence rates are reported per 1,000 person-years.

† Incidence rates were directly standardized to the total US population from the 2010 US Decennial Census after removing the number of people with prevalent multimorbidity ( $\geq 2$  chronic conditions) as projected from our previous study (see Supplementary Table B).<sup>16</sup>

**Table 2.** Incidence of the third of three chronic conditions (per 1,000 person-years) in persons living in Olmsted County, MN by age, sex, and ethnicity.

| Ethnicity<br>age (years) | Men     |                  |                        | Women   |                  |                        |
|--------------------------|---------|------------------|------------------------|---------|------------------|------------------------|
|                          | Persons | Person-<br>years | Incidence<br>rate* (n) | Persons | Person-<br>years | Incidence<br>rate* (n) |
| <b>All ethnic groups</b> |         |                  |                        |         |                  |                        |
| 0-19                     | 19,029  | 144,025          | 1.3 (186)              | 18,203  | 138,055          | 2.0 (282)              |
| 20-39                    | 28,721  | 162,693          | 6.9 (1,123)            | 30,135  | 177,878          | 10.9 (1,944)           |
| 40-49                    | 17,901  | 95,582           | 22.6 (2,157)           | 18,824  | 103,400          | 24.2 (2,507)           |
| 50-59                    | 14,398  | 69,907           | 52.8 (3,688)           | 15,475  | 76,247           | 51.5 (3,930)           |
| 60-69                    | 7,517   | 31,617           | 99.5 (3,146)           | 8,313   | 35,342           | 96.7 (3,416)           |
| 70-79                    | 3,109   | 10,639           | 169.7 (1,805)          | 3,899   | 13,653           | 156.4 (2,136)          |
| ≥ 80                     | 992     | 3,230            | 218.9 (707)            | 1,970   | 6,414            | 230.6 (1,479)          |
| 0-64                     | 53,073  | 491,536          | 18.0 (8,852)           | 54,280  | 517,164          | 20.2 (10,432)          |
| ≥ 65                     | 5,938   | 26,156           | 151.4 (3,960)          | 7,706   | 33,825           | 155.6 (5,262)          |
| All ages                 | 55,898  | 517,693          | 24.7 (12,812)          | 58,450  | 550,989          | 28.5 (15,694)          |
| Standardized†            | ---     | ---              | 25.5                   | ---     | ---              | 26.6                   |
| <b>Blacks</b>            |         |                  |                        |         |                  |                        |
| 0-19                     | 879     | 6,530            | 1.1 (7)                | 751     | 5,458            | 1.1 (6)                |
| 20-39                    | 1,123   | 6,428            | 8.6 (55)               | 960     | 6,032            | 9.4 (57)               |
| 40-49                    | 460     | 2,126            | 34.8 (74)              | 373     | 1,723            | 41.2 (71)              |
| 50-59                    | 218     | 952              | 69.3 (66)              | 173     | 737              | 69.2 (51)              |
| 60-69                    | 81      | 312              | 96.1 (30)              | 70      | 241              | 132.8 (32)             |
| 70-79                    | 27      | 108              | 129.4 (14)             | 28      | 84               | 191.0 (16)             |
| ≥ 80                     | 5       | 23               | 172.3 (4)              | 5       | 9                | 321.2 (3)              |
| 0-64                     | 1,883   | 16,227           | 13.3 (216)             | 1,602   | 14,101           | 14.5 (205)             |
| ≥ 65                     | 58      | 252              | 135.1 (34)             | 54      | 183              | 169.2 (31)             |
| All ages                 | 1,911   | 16,479           | 15.2 (250)             | 1,633   | 14,284           | 16.5 (236)             |
| Standardized†            | ---     | ---              | 28.2                   | ---     | ---              | 34.8                   |
| <b>Asians</b>            |         |                  |                        |         |                  |                        |
| 0-19                     | 823     | 6,419            | 0.6 (4)                | 832     | 6,442            | 1.6 (10)               |
| 20-39                    | 1,109   | 6,747            | 6.2 (42)               | 1,206   | 7,587            | 4.6 (35)               |
| 40-49                    | 574     | 2,841            | 18.7 (53)              | 651     | 3,327            | 20.7 (69)              |
| 50-59                    | 390     | 1,942            | 44.8 (87)              | 439     | 2,191            | 46.1 (101)             |
| 60-69                    | 203     | 830              | 78.3 (65)              | 254     | 966              | 97.3 (94)              |
| 70-79                    | 80      | 259              | 138.8 (36)             | 110     | 353              | 141.5 (50)             |
| ≥ 80                     | 32      | 84               | 202.0 (17)             | 84      | 228              | 241.2 (55)             |
| 0-64                     | 1,940   | 18,472           | 12.2 (225)             | 2,074   | 20,167           | 12.9 (261)             |
| ≥ 65                     | 165     | 650              | 121.5 (79)             | 258     | 929              | 164.7 (153)            |
| All ages                 | 2,027   | 19,122           | 15.9 (304)             | 2,235   | 21,096           | 19.6 (414)             |
| Standardized†            | ---     | ---              | 21.1                   | ---     | ---              | 23.2                   |
| <b>Whites</b>            |         |                  |                        |         |                  |                        |
| 0-19                     | 15,088  | 122,717          | 1.3 (160)              | 14,576  | 117,885          | 2.2 (259)              |
| 20-39                    | 22,681  | 138,725          | 7.1 (990)              | 24,638  | 154,160          | 11.7 (1,799)           |
| 40-49                    | 15,811  | 87,199           | 22.7 (1,978)           | 17,025  | 95,693           | 24.1 (2,308)           |
| 50-59                    | 13,262  | 65,243           | 53.1 (3,464)           | 14,443  | 71,770           | 51.7 (3,714)           |



Table 2. Continued

| Ethnicity<br>age (years) | Men     |                  |                        | Women   |                  |                        |
|--------------------------|---------|------------------|------------------------|---------|------------------|------------------------|
|                          | Persons | Person-<br>years | Incidence<br>rate* (n) | Persons | Person-<br>years | Incidence<br>rate* (n) |
| 60-69                    | 7,028   | 29,816           | 100.8 (3,005)          | 7,796   | 33,477           | 96.9 (3,244)           |
| 70-79                    | 2,930   | 10,061           | 171.9 (1,729)          | 3,680   | 13,006           | 157.2 (2,045)          |
| ≥ 80                     | 942     | 3,093            | 219.5 (679)            | 1,848   | 6,105            | 231.0 (1,410)          |
| 0-64                     | 42,953  | 432,089          | 19.0 (8,213)           | 45,157  | 459,919          | 21.2 (9,761)           |
| ≥ 65                     | 5,572   | 24,764           | 153.1 (3,792)          | 7,224   | 32,177           | 155.9 (5,018)          |
| All ages                 | 45,583  | 456,853          | 26.3 (12,005)          | 49,033  | 492,097          | 30.0 (14,779)          |
| Standardized†            | ---     | ---              | 25.7                   | ---     | ---              | 27.0                   |

\* Incidence rates are reported per 1,000 person-years.

† Incidence rates were directly standardized to the total US population from the 2010 US Decennial Census after removing the number of people with prevalent multimorbidity (≥ 3 chronic conditions) as projected from our previous study (see Supplementary Table B).<sup>16</sup>

**Table 3.** Incidence rates (per 1,000 person-years) and composition of the most common dyads and triads of chronic conditions in persons living in Olmsted County, MN by age and sex.

| Age<br>(years)<br>Rank * | Dyad          |            |               |            | Triad            |            |                  |            |
|--------------------------|---------------|------------|---------------|------------|------------------|------------|------------------|------------|
|                          | Men           |            | Women         |            | Men              |            | Women            |            |
|                          | Combination † | Rate (n) ‡ | Combination † | Rate (n) ‡ | Combination †    | Rate (n) § | Combination †    | Rate (n) § |
| <b>0 – 19</b>            |               |            |               |            |                  |            |                  |            |
| 1                        | DEP - AST     | 1.8 (257)  | DEP - AST     | 2.9 (395)  | DEP - AST - SUB  | 0.4 (53)   | DEP - AST - SUB  | 0.4 (62)   |
| 2                        | DEP - SUB     | 1.3 (178)  | DEP - SUB     | 1.8 (240)  | DEP - AST - COPD | 0.1 (17)   | DEP - AST - COPD | 0.3 (39)   |
| 3                        | AST - COPD    | 0.9 (122)  | AST - COPD    | 0.7 (91)   | DEP - SUB - SZO  | 0.1 (8)    | DEP - ARR - AST  | 0.2 (27)   |
| 4                        | AST - SUB     | 0.4 (56)   | DEP - ARR     | 0.4 (50)   | LIP - DEP - AST  | <0.1 (7)   | DEP - ARR - SUB  | 0.1 (13)   |
| 5                        | DEP - ARR     | 0.1 (21)   | DEP - COPD    | 0.4 (48)   | 3-way tie        | < 0.1 (6)  | DEP - SUB - COPD | 0.1 (12)   |
| <b>20 – 39</b>           |               |            |               |            |                  |            |                  |            |
| 1                        | DEP - SUB     | 3.5 (525)  | DEP - AST     | 3.4 (531)  | DEP - AST - SUB  | 0.4 (73)   | DEP - AST - SUB  | 0.8 (134)  |
| 2                        | LIP - HTN     | 1.4 (207)  | DEP - SUB     | 2.9 (463)  | DEP - SUB - SZO  | 0.4 (69)   | DEP - AST - COPD | 0.7 (121)  |
| 3                        | DEP - AST     | 1.1 (174)  | DEP - CAN     | 2.0 (309)  | LIP - HTN - DIA  | 0.4 (65)   | DEP - ARR - AST  | 0.4 (77)   |
| 4                        | LIP - DEP     | 1.0 (155)  | LIP - DEP     | 1.7 (267)  | DEP - ARR - SUB  | 0.3 (46)   | DEP - SUB - COPD | 0.3 (61)   |
| 5                        | LIP - DIA     | 0.9 (137)  | DEP - ARR     | 1.4 (222)  | LIP - HTN - DEP  | 0.3 (45)   | LIP - DEP - AST  | 0.3 (58)   |
| <b>40 – 49</b>           |               |            |               |            |                  |            |                  |            |
| 1                        | LIP - HTN     | 7.0 (580)  | LIP - DEP     | 4.1 (354)  | LIP - HTN - DIA  | 3.1 (294)  | LIP - HTN - DIA  | 1.4 (147)  |
| 2                        | LIP - DIA     | 4.4 (363)  | LIP - HTN     | 3.6 (308)  | LIP - HTN - DEP  | 1.2 (115)  | LIP - HTN - DEP  | 1.1 (114)  |
| 3                        | LIP - DEP     | 3.5 (285)  | DEP - ART     | 2.6 (224)  | LIP - HTN - ART  | 0.9 (84)   | LIP - DEP - DIA  | 1.0 (99)   |
| 4                        | LIP - ART     | 2.4 (198)  | DEP - CAN     | 2.6 (224)  | LIP - HTN - CAD  | 0.9 (83)   | LIP - DEP - ART  | 0.8 (84)   |
| 5                        | DEP - SUB     | 1.9 (157)  | HTN - DEP     | 2.4 (203)  | LIP - DEP - DIA  | 0.8 (74)   | LIP - DEP - AST  | 0.6 (63)   |
| <b>50 – 59</b>           |               |            |               |            |                  |            |                  |            |
| 1                        | LIP - HTN     | 14.5 (757) | LIP - HTN     | 9.8 (540)  | LIP - HTN - DIA  | 7.2 (504)  | LIP - HTN - DIA  | 3.9 (300)  |
| 2                        | LIP - DIA     | 8.7 (455)  | LIP - ART     | 6.5 (359)  | LIP - HTN - ART  | 3.5 (242)  | LIP - HTN - ART  | 3.0 (232)  |
| 3                        | LIP - ART     | 6.7 (351)  | LIP - DEP     | 5.9 (325)  | LIP - HTN - CAD  | 3.0 (208)  | LIP - HTN - DEP  | 2.4 (185)  |
| 4                        | LIP - CAN     | 4.6 (241)  | DEP - ART     | 4.8 (265)  | LIP - HTN - DEP  | 1.9 (131)  | LIP - DEP - ART  | 2.4 (180)  |
| 5                        | HTN - DIA     | 4.4 (227)  | LIP - CAN     | 4.5 (246)  | LIP - HTN - ARR  | 1.7 (117)  | LIP - HTN - CAN  | 1.8 (136)  |

Table 3. Continued 1

| Age<br>(years)<br>Rank * | Dyad          |            |               |            | Triad           |            |                 |            |
|--------------------------|---------------|------------|---------------|------------|-----------------|------------|-----------------|------------|
|                          | Men           |            | Women         |            | Men             |            | Women           |            |
|                          | Combination † | Rate (n) ‡ | Combination † | Rate (n) ‡ | Combination †   | Rate (n) § | Combination †   | Rate (n) § |
| <b>60 – 69</b>           |               |            |               |            |                 |            |                 |            |
| 1                        | LIP - HTN     | 23.4 (460) | LIP - HTN     | 18.8 (400) | LIP - HTN - DIA | 11.6 (366) | LIP - HTN - ART | 10.3 (363) |
| 2                        | LIP - DIA     | 11.5 (226) | LIP - ART     | 15.5 (330) | LIP - HTN - ART | 6.8 (214)  | LIP - HTN - DIA | 7.4 (263)  |
| 3                        | LIP - ART     | 11.4 (224) | HTN - ART     | 10.4 (220) | LIP - HTN - CAD | 6.3 (200)  | LIP - HTN - CAN | 4.6 (164)  |
| 4                        | LIP - CAN     | 10.0 (196) | LIP - CAN     | 6.8 (145)  | LIP - HTN - CAN | 4.9 (155)  | LIP - ART - CAN | 2.9 (102)  |
| 5                        | HTN - DIA     | 8.6 (169)  | LIP - DIA     | 6.4 (135)  | LIP - HTN - ARR | 3.4 (106)  | LIP - DIA - ART | 2.7 (95)   |
| 6                        | HTN - ART     | 7.7 (152)  | ART - CAN     | 4.9 (105)  | LIP - DIA - ART | 2.9 (91)   | LIP - HTN - DEP | 2.6 (93)   |
| 7                        | LIP - CAD     | 6.9 (136)  | LIP - OST     | 4.9 (105)  | LIP - ART - CAN | 2.6 (82)   | LIP - DEP - ART | 2.5 (89)   |
| 8                        | HTN - CAN     | 6.2 (121)  | HTN - CAN     | 4.8 (103)  | LIP - DIA - CAD | 2.4 (76)   | LIP - ART - ARR | 2.3 (83)   |
| 9                        | ART - CAN     | 4.5 (89)   | HTN - DIA     | 4.6 (97)   | HTN - DIA - ART | 2.2 (71)   | LIP - HTN - OST | 2.2 (79)   |
| 10                       | LIP - ARR     | 4.5 (88)   | LIP - DEP     | 4.4 (94)   | LIP - ARR - CAD | 2.2 (68)   | HTN - DIA - ART | 2.2 (77)   |
| <b>70 – 79</b>           |               |            |               |            |                 |            |                 |            |
| 1                        | LIP - HTN     | 19.1 (104) | LIP - HTN     | 26.0 (173) | LIP - HTN - CAN | 11.9 (127) | LIP - HTN - ART | 15.7 (214) |
| 2                        | HTN - CAN     | 18.9 (103) | HTN - ART     | 18.5 (123) | LIP - HTN - DIA | 10.4 (111) | LIP - HTN - DIA | 9.8 (134)  |
| 3                        | LIP - CAN     | 15.0 (82)  | LIP - ART     | 15.5 (103) | LIP - HTN - CAD | 9.7 (103)  | LIP - HTN - CAN | 6.0 (82)   |
| 4                        | HTN - ART     | 13.2 (72)  | LIP - OST     | 9.0 (60)   | LIP - HTN - ART | 9.4 (100)  | LIP - ART - CAN | 5.4 (74)   |
| 5                        | ART - CAN     | 11.6 (63)  | HTN - CAN     | 8.9 (59)   | LIP - HTN - ARR | 5.5 (58)   | HTN - ART - CAN | 5.2 (71)   |
| 6                        | LIP - ART     | 11.6 (63)  | HTN - OST     | 8.3 (55)   | HTN - ART - CAN | 4.9 (52)   | LIP - ART - OST | 5.2 (71)   |
| 7                        | HTN - DIA     | 10.1 (55)  | ART - CAN     | 8.1 (54)   | LIP - ART - CAN | 4.7 (50)   | LIP - HTN - OST | 4.6 (63)   |
| 8                        | HTN - ARR     | 9.9 (54)   | ART - OST     | 7.8 (52)   | HTN - CAN - ARR | 4.2 (45)   | LIP - HTN - ARR | 4.5 (62)   |
| 9                        | LIP - CAD     | 7.7 (42)   | HTN - DIA     | 7.8 (52)   | HTN - ART - ARR | 4.1 (44)   | HTN - ART - OST | 4.0 (55)   |
| 10                       | LIP - DIA     | 7.7 (42)   | LIP - CAN     | 7.8 (52)   | LIP - DIA - CAN | 4.1 (44)   | 2-way tie ¶     | 3.4 (47)   |
| <b>≥ 80</b>              |               |            |               |            |                 |            |                 |            |
| 1                        | HTN - CAN     | 18.9 (30)  | HTN - ART     | 27.7 (80)  | HTN - CAN - ARR | 8.7 (28)   | LIP - HTN - ART | 10.3 (66)  |
| 2                        | HTN - ARR     | 17.6 (28)  | LIP - HTN     | 23.2 (67)  | LIP - HTN - CAN | 7.7 (25)   | HTN - ART - OST | 9.8 (63)   |
| 3                        | HTN - ART     | 14.5 (23)  | HTN - ARR     | 17.7 (51)  | HTN - ART - CAN | 7.4 (24)   | HTN - ART - CAN | 9.2 (59)   |

Table 3. Continued 2

| Age (years)<br>Rank * | Dyad          |            |               |            | Triad           |            |                 |            |
|-----------------------|---------------|------------|---------------|------------|-----------------|------------|-----------------|------------|
|                       | Men           |            | Women         |            | Men             |            | Women           |            |
|                       | Combination † | Rate (n) ‡ | Combination † | Rate (n) ‡ | Combination †   | Rate (n) § | Combination †   | Rate (n) § |
| 4                     | ART - ARR     | 12.0 (19)  | HTN - CAN     | 15.2 (44)  | LIP - HTN - ART | 6.2 (20)   | HTN - ART - ARR | 9.0 (58)   |
| 5                     | CAN - ARR     | 12.0 (19)  | HTN - OST     | 14.9 (43)  | LIP - HTN - ARR | 5.9 (19)   | LIP - HTN - OST | 5.9 (38)   |
| 6                     | HTN - CAD     | 10.1 (16)  | HTN - DEM     | 11.8 (34)  | ART - CAN - ARR | 5.3 (17)   | LIP - HTN - DIA | 5.0 (32)   |
| 7                     | LIP - HTN     | 10.1 (16)  | ART - CAN     | 10.0 (29)  | HTN - ART - ARR | 5.3 (17)   | LIP - HTN - ARR | 4.7 (30)   |
| 8                     | ART - CAN     | 8.8 (14)   | ART - OST     | 9.7 (28)   | HTN - CAN - CAD | 5.0 (16)   | LIP - HTN - CAN | 4.5 (29)   |
| 9                     | CAN - CAD     | 8.8 (14)   | HTN - CKD     | 7.6 (22)   | LIP - HTN - CAD | 5.0 (16)   | ART - CAN - OST | 4.4 (28)   |
| 10                    | HTN - DEM     | 8.8 (14)   | 3-way tie **  | 7.3 (21)   | LIP - ART - CAN | 4.6 (15)   | LIP - HTN - CAD | 3.9 (25)   |

\* Rank order from the most frequent to the least frequent incident dyad or triad. For the younger age groups (through age 59 years), we reported the 5 most frequent incident combinations; for the older age groups (60 years and older), we reported the 10 most frequent incident combinations.

† Definition of acronyms in order of frequency: LIP = hyperlipidemia; HTN = hypertension; DEP = depression; DIA = diabetes; ART = arthritis; CAN = cancer; ARR = cardiac arrhythmias; AST = asthma; CAD = coronary artery disease; SUB = substance abuse disorders; COPD = chronic obstructive pulmonary disease; OST = osteoporosis; CKD = chronic kidney disease; STR = stroke; CHF = congestive heart failure; DEM = dementia; SZO = schizophrenia; HEP = hepatitis; AUT = autism spectrum disorder; and HIV = human immunodeficiency virus.

‡ Incidence rates per 1,000 person years. Rates can be calculated by dividing the number of incident persons in parentheses by the person- years at risk of 2 conditions from each age- and sex-specific stratum for all ethnic groups combined in Table 1.

§ Incidence rates per 1,000 person years. Rates can be calculated by dividing the number of incident persons in parentheses by the person-years at risk of 3 conditions from each age- and sex-specific stratum for all ethnic groups combined in Table 2.

|| Three-way tie for the rank 5 triad in men ages 0-19 years: 1) AST-SUB-COPD; 2) DEP-ARR-SUB; 3) DEP-AST-DEM.

¶ Two-way tie for the rank 10 triad in women ages 70-79 years: 1) HTN-ART-ARR; 2) LIP-CAN-OST.

\*\* Three-way tie for the rank 10 dyad in women ages ≥ 80 years: 1) ART-ARR; 2) HTN-DIA; 3) LIP-ART.

## Figure Legends

**Figure 1.** Age- and sex-specific incidence rates (per 1,000 person-years) of the 20 chronic conditions considered separately. The 20 panels are presented by rows in decreasing order of frequency (by overall age- and sex-standardized prevalence).<sup>16</sup>

**Figure 2.** Incidence rates (per 1,000 person-years) of 2 chronic conditions (second condition in a dyad) and of 3 chronic conditions (third condition in a triad) in men and women separately (panels A and C), and stratified by ethnicity (panels B and D).

Figure 1



Figure 2

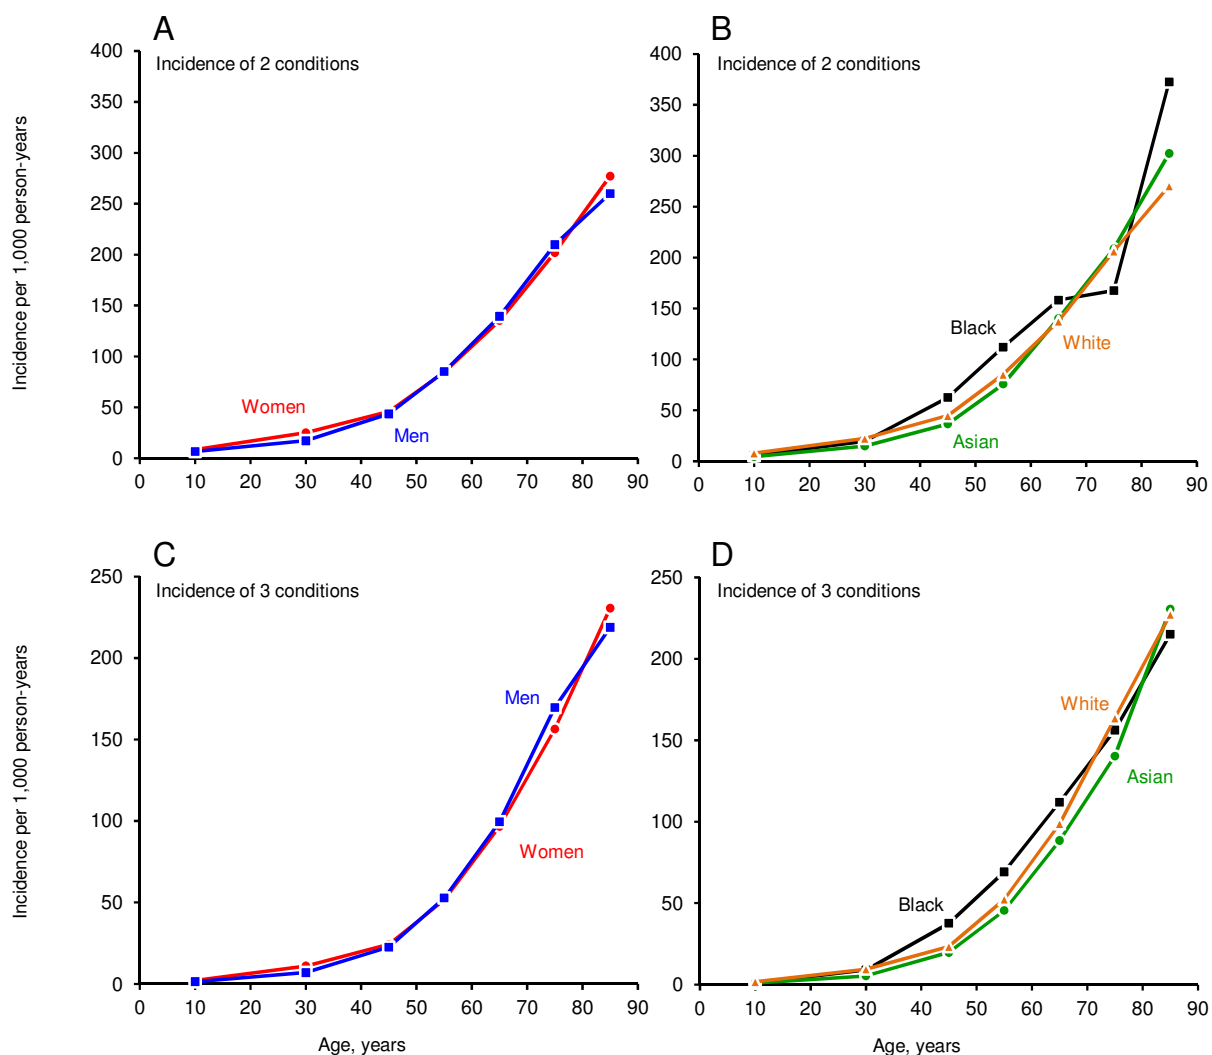

view only

**Appendix 1:** Supplementary tables A-C [posted as supplied by the authors]**Supplementary table A.** List of the twenty chronic conditions selected by the US-DHHS \*

| Description †           | Acronym<br>or<br>Abbreviation | CCC ‡    | CMS (ICD-9 codes) §                                                                                                                                                                                                                                                                                                                                                                                                                                                                                                                                           |
|-------------------------|-------------------------------|----------|---------------------------------------------------------------------------------------------------------------------------------------------------------------------------------------------------------------------------------------------------------------------------------------------------------------------------------------------------------------------------------------------------------------------------------------------------------------------------------------------------------------------------------------------------------------|
| Hyperlipidemia          | LIP                           | 53       | 272.0, 272.1, 272.2, 272.3, 272.4                                                                                                                                                                                                                                                                                                                                                                                                                                                                                                                             |
| Hypertension            | HTN                           | 98, 99   | 401.0, 401.1, 401.9, 402.00, 402.01, 402.10, 402.11, 402.90, 402.91, 403.00, 403.01, 403.10, 403.11, 403.90, 403.91, 404.00, 404.01, 404.02, 404.03, 404.10, 404.11, 404.12, 404.13, 404.90, 404.91, 404.92, 404.93, 405.01, 405.09, 405.11, 405.19, 405.91, 405.99, 362.11, 437.2                                                                                                                                                                                                                                                                            |
| Depression              | DEP                           | 657      | 296.20, 296.21, 296.22, 296.23, 296.24, 296.25, 296.26, 296.30, 296.31, 296.32, 296.33, 296.34, 296.35, 296.36, 296.51, 296.52, 296.53, 296.54, 296.55, 296.56, 296.60, 296.61, 296.62, 296.63, 296.64, 296.65, 296.66, 296.89, 298.0, 300.4, 309.1, 311                                                                                                                                                                                                                                                                                                      |
| Diabetes                | DIA                           | 49,50    | 249.00, 249.01, 249.10, 249.11, 249.20, 249.21, 249.30, 249.31, 249.40, 249.41, 249.50, 249.51, 249.60, 249.61, 249.70, 249.71, 249.80, 249.81, 249.90, 249.91, 250.00, 250.01, 250.02, 250.03, 250.10, 250.11, 250.12, 250.13, 250.20, 250.21, 250.22, 250.23, 250.30, 250.31, 250.32, 250.33, 250.40, 250.41, 250.42, 250.43, 250.50, 250.51, 250.52, 250.53, 250.60, 250.61, 250.62, 250.63, 250.70, 250.71, 250.72, 250.73, 250.80, 250.81, 250.82, 250.83, 250.90, 250.91, 250.92, 250.93, 357.2, 362.01, 362.02, 362.03, 362.04, 362.05, 362.06, 366.41 |
| Arthritis               | ART                           | 202, 203 | 714.0, 714.1, 714.2, 714.30, 714.31, 714.32, 714.33, 715.00, 715.04, 715.09, 715.10, 715.11, 715.12, 715.13, 715.14, 715.15, 715.16, 715.17, 715.18, 715.20, 715.21, 715.22, 715.23, 715.24, 715.25, 715.26, 715.27, 715.28, 715.30, 715.31, 715.32, 715.33, 715.34, 715.35, 715.36, 715.37, 715.38, 715.80, 715.89, 715.90, 715.91, 715.92, 715.93, 715.94, 715.95, 715.96, 715.97, 715.98, 720.0, 721.0, 721.1, 721.2, 721.3, 721.90, 721.91                                                                                                                |
| Cancer                  | CAN                           | 11-43    | Female breast cancer: 174.0, 174.1, 174.2, 174.3, 174.4, 174.5, 174.6, 174.8, 174.9, 175.0, 175.9, 233.0, V10.3. Colorectal cancer: 154.0, 154.1, 153.0, 153.1, 153.2, 153.3, 153.4, 153.5, 153.6, 153.7, 153.8, 153.9, 230.3, 230.4, V10.05. Prostate cancer: 185, 233.4, V10.46. Lung cancer: 162.2, 162.3, 162.4, 162.5, 162.8, 162.9, 231.2, V10.11.                                                                                                                                                                                                      |
| Cardiac arrhythmias     | ARR                           | 105-106  | 427.31                                                                                                                                                                                                                                                                                                                                                                                                                                                                                                                                                        |
| Asthma                  | AST                           | 128      | 493.00, 493.01, 493.02, 493.10, 493.11, 493.12, 493.20, 493.21, 493.22, 493.81, 493.82, 493.90, 493.91, 493.92                                                                                                                                                                                                                                                                                                                                                                                                                                                |
| Coronary artery disease | CAD                           | 100, 101 | 410.00, 410.01, 410.02, 410.10, 410.11, 410.12, 410.20, 410.21, 410.22, 410.30, 410.31, 410.32, 410.40, 410.41, 410.42, 410.50, 410.51, 410.52, 410.60, 410.61, 410.62, 410.70, 410.71, 410.72, 410.80, 410.81, 410.82, 410.90, 410.91, 410.92, 411.0, 411.1, 411.81, 411.89, 412, 413.0, 413.1, 413.9, 414.00, 414.01, 414.02, 414.03, 414.04, 414.05, 414.06, 414.07, 414.12, 414.2, 414.3, 414.8, 414.9                                                                                                                                                    |



**Supplementary table A.** List of the twenty chronic conditions selected by the US-DHHS \*  
(continued)

| Description †                                               | Acronym<br>or<br>Abbreviation | CCC ‡                           | CMS (ICD-9 codes) §                                                                                                                                                                                                                                                                                                                                                                                                                                                                                                                                                                                                                                                                                                       |
|-------------------------------------------------------------|-------------------------------|---------------------------------|---------------------------------------------------------------------------------------------------------------------------------------------------------------------------------------------------------------------------------------------------------------------------------------------------------------------------------------------------------------------------------------------------------------------------------------------------------------------------------------------------------------------------------------------------------------------------------------------------------------------------------------------------------------------------------------------------------------------------|
| Substance abuse disorders (drug and alcohol)                | SUB                           | 660-661                         | Not applicable                                                                                                                                                                                                                                                                                                                                                                                                                                                                                                                                                                                                                                                                                                            |
| Chronic obstructive pulmonary disease                       | COPD                          | 127                             | 490, 491.0, 491.1, 491.20, 491.21, 491.22, 491.8, 491.9, 492.0, 492.8, 494.0, 494.1, 496                                                                                                                                                                                                                                                                                                                                                                                                                                                                                                                                                                                                                                  |
| Osteoporosis                                                | OST                           | 206                             | 733.00, 733.01, 733.02, 733.03, 733.09                                                                                                                                                                                                                                                                                                                                                                                                                                                                                                                                                                                                                                                                                    |
| Chronic kidney disease                                      | CKD                           | 158                             | 016.00, 016.01, 016.02, 016.03, 016.04, 016.05, 016.06, 095.4, 189.0, 189.9, 223.0, 236.91, 249.40, 249.41, 250.40, 250.41, 250.42, 250.43, 271.4, 274.10, 283.11, 403.01, 403.11, 403.91, 404.02, 404.03, 404.12, 404.13, 404.92, 404.93, 440.1, 442.1, 572.4, 580.0, 580.4, 580.81, 580.89, 580.9, 581.0, 581.1, 581.2, 581.3, 581.81, 581.89, 581.9, 582.0, 582.1, 582.2, 582.4, 582.81, 582.89, 582.9, 583.0, 583.1, 583.2, 583.4, 583.6, 583.7, 583.81, 583.89, 583.9, 584.5, 584.6, 584.7, 584.8, 584.9, 585.1, 585.2, 585.3, 585.4, 585.5, 585.6, 585.9, 586, 587, 588.0, 588.1, 588.81, 588.89, 588.9, 591, 753.12, 753.13, 753.14, 753.15, 753.16, 753.17, 753.19, 753.20, 753.21, 753.22, 753.23, 753.29, 794.4 |
| Stroke                                                      | STR                           | 109-112                         | 430, 431, 433.01, 433.11, 433.21, 433.31, 433.81, 433.91, 434.00, 434.01, 434.10, 434.11, 434.90, 434.91, 435.0, 435.1, 435.3, 435.8, 435.9, 436, 997.02                                                                                                                                                                                                                                                                                                                                                                                                                                                                                                                                                                  |
| Congestive heart failure                                    | CHF                           | 108                             | 398.91, 402.01, 402.11, 402.91, 404.01, 404.11, 404.91, 404.03, 404.13, 404.93, 428.0, 428.1, 428.20, 428.21, 428.22, 428.23, 428.30, 428.31, 428.32, 428.33, 428.40, 428.41, 428.42, 428.43, 428.9                                                                                                                                                                                                                                                                                                                                                                                                                                                                                                                       |
| Dementia (including Alzheimer's and other senile dementias) | DEM                           | 653                             | 331.0, 331.11, 331.19, 331.2, 331.7, 290.0, 290.10, 290.11, 290.12, 290.13, 290.20, 290.21, 290.3, 290.40, 290.41, 290.42, 290.43, 294.0, 294.10, 294.11, 294.8, 797                                                                                                                                                                                                                                                                                                                                                                                                                                                                                                                                                      |
| Schizophrenia                                               | SZO                           | 659                             | Not applicable                                                                                                                                                                                                                                                                                                                                                                                                                                                                                                                                                                                                                                                                                                            |
| Hepatitis                                                   | HEP                           | 6                               | Not applicable                                                                                                                                                                                                                                                                                                                                                                                                                                                                                                                                                                                                                                                                                                            |
| Autism spectrum disorder                                    | AUT                           | 299.00,<br>299.01 <sup>  </sup> | Not applicable                                                                                                                                                                                                                                                                                                                                                                                                                                                                                                                                                                                                                                                                                                            |
| Human immunodeficiency virus (HIV)                          | HIV                           | 5                               | Not applicable                                                                                                                                                                                                                                                                                                                                                                                                                                                                                                                                                                                                                                                                                                            |

\* CCC = Clinical Classification Codes; CMS = Centers for Medicare and Medicaid Services; ICD-9 = International Classification of Diseases, 9<sup>th</sup> revision; US-DHHS = US Department of Health and Human Services.

† The 20 conditions were defined by the US-DHHS as detailed elsewhere. (Goodman et al., 2013) Each condition is defined by having a code in either the CCC group of codes or the CMS group of codes. Conditions are listed in decreasing order of frequency (by overall age and sex standardized prevalence; same order as in Figure 1).

‡ We list the CCC chapters developed by the Agency for Healthcare Research and Quality (AHRQ). Each CCC chapter includes a list of ICD-9 codes as detailed elsewhere. (Cohen et al., 2009)

§ We list the ICD-9 codes defined in the Chronic Conditions Data Warehouse of the CMS.

<sup>||</sup> Autism-spectrum disorder is not defined in either the CCC or the CMS code groupings, but rather is defined by two distinct ICD-9 codes.

**Supplementary table B.** Total US population used for direct standardization of incidence rates

| Age                                       | Men                       |                      |                          | Women                     |                      |                          | Adjusting population <sup>§</sup> |
|-------------------------------------------|---------------------------|----------------------|--------------------------|---------------------------|----------------------|--------------------------|-----------------------------------|
|                                           | US Total (n) <sup>*</sup> | Prev. % <sup>†</sup> | At risk (n) <sup>‡</sup> | US Total (n) <sup>*</sup> | Prev. % <sup>†</sup> | At risk (n) <sup>‡</sup> |                                   |
| <b>Prevalence of 2 chronic conditions</b> |                           |                      |                          |                           |                      |                          |                                   |
| 0-19 y                                    | 42,592                    | 1.26                 | 42,054                   | 40,675                    | 1.40                 | 40,108                   | 82,162                            |
| 20-39 y                                   | 41,688                    | 6.98                 | 38,779                   | 41,140                    | 8.74                 | 37,546                   | 76,325                            |
| 40-49 y                                   | 21,603                    | 20.37                | 17,202                   | 21,995                    | 19.71                | 17,660                   | 34,862                            |
| 50-59 y                                   | 20,456                    | 38.13                | 12,657                   | 21,505                    | 35.77                | 13,813                   | 26,470                            |
| 60-69 y                                   | 13,930                    | 59.41                | 5,654                    | 15,323                    | 58.35                | 6,381                    | 12,036                            |
| 70-79 y                                   | 7,427                     | 79.73                | 1,506                    | 9,170                     | 78.27                | 1,993                    | 3,498                             |
| ≥ 80 y                                    | 4,084                     | 87.86                | 496                      | 7,152                     | 86.41                | 972                      | 1,467                             |
| <b>Prevalence of 3 chronic conditions</b> |                           |                      |                          |                           |                      |                          |                                   |
| 0-19 y                                    | 42,592                    | 0.17                 | 42,521                   | 40,675                    | 0.25                 | 40,575                   | 83,096                            |
| 20-39 y                                   | 41,688                    | 2.12                 | 40,805                   | 41,140                    | 2.57                 | 40,083                   | 80,887                            |
| 40-49 y                                   | 21,603                    | 9.40                 | 19,572                   | 21,995                    | 8.55                 | 20,115                   | 39,687                            |
| 50-59 y                                   | 20,456                    | 21.06                | 16,148                   | 21,505                    | 19.30                | 17,355                   | 33,503                            |
| 60-69 y                                   | 13,930                    | 40.88                | 8,235                    | 15,323                    | 38.32                | 9,452                    | 17,687                            |
| 70-79 y                                   | 7,427                     | 65.11                | 2,591                    | 9,170                     | 62.05                | 3,480                    | 6,071                             |
| ≥ 80 y                                    | 4,084                     | 78.93                | 861                      | 7,152                     | 74.17                | 1,848                    | 2,708                             |

\* Population (in thousands) of the entire United States from the decennial census of 2010.

† Prevalence of 2 or 3 chronic conditions from our previous study in Olmsted County, MN. (Rocca et., al, In Press)

‡ Total population at risk (in thousands) after removing the estimated prevalent persons who have already reached 2 or 3 chronic conditions.

§ The total population (in thousands) used in Tables 1 and 2 for direct standardization.

**Supplementary table C.** Incidence of twenty chronic conditions considered individually

| Condition<br>age (years) | Men     |                  |                         | Women   |                  |                         |
|--------------------------|---------|------------------|-------------------------|---------|------------------|-------------------------|
|                          | Persons | Person-<br>years | Incidence<br>rate * (n) | Persons | Person-<br>years | Incidence<br>rate * (n) |
| <b>Hyperlipidemia</b>    |         |                  |                         |         |                  |                         |
| 0-19                     | 18,996  | 143,882          | 0.6 (91)                | 18,174  | 138,140          | 0.7 (94)                |
| 20-39                    | 28,437  | 159,373          | 10.0 (1,586)            | 30,040  | 179,745          | 7.3 (1,311)             |
| 40-49                    | 16,512  | 82,705           | 38.5 (3,186)            | 18,328  | 99,834           | 24.3 (2,428)            |
| 50-59                    | 11,993  | 54,436           | 64.4 (3,504)            | 14,248  | 68,637           | 51.0 (3,500)            |
| 60-69                    | 6,023   | 25,216           | 82.4 (2,077)            | 7,111   | 30,967           | 75.7 (2,345)            |
| 70-79                    | 3,077   | 11,661           | 94.1 (1,097)            | 3,821   | 14,970           | 78.0 (1,168)            |
| ≥ 80                     | 1,712   | 7,163            | 60.5 (433)              | 3,319   | 15,777           | 40.6 (641)              |
| <b>Hypertension</b>      |         |                  |                         |         |                  |                         |
| 0-19                     | 19,029  | 144,237          | 0.5 (65)                | 18,215  | 138,569          | 0.4 (51)                |
| 20-39                    | 28,626  | 162,582          | 5.9 (954)               | 30,315  | 183,220          | 5.0 (908)               |
| 40-49                    | 17,289  | 92,372           | 20.4 (1,882)            | 18,790  | 105,079          | 16.0 (1,683)            |
| 50-59                    | 13,481  | 67,250           | 38.0 (2,556)            | 15,013  | 77,172           | 30.3 (2,341)            |
| 60-69                    | 7,077   | 31,540           | 63.2 (1,993)            | 7,971   | 36,990           | 50.3 (1,859)            |
| 70-79                    | 3,331   | 13,402           | 92.6 (1,241)            | 3,941   | 16,136           | 83.0 (1,339)            |
| ≥ 80                     | 1,354   | 5,198            | 112.0 (582)             | 2,053   | 7,919            | 121.9 (965)             |
| <b>Depression</b>        |         |                  |                         |         |                  |                         |
| 0-19                     | 18,794  | 139,315          | 9.3 (1,297)             | 17,774  | 131,126          | 16.8 (2,198)            |
| 20-39                    | 27,342  | 150,493          | 13.9 (2,091)            | 27,026  | 146,257          | 28.2 (4,118)            |
| 40-49                    | 17,234  | 94,033           | 13.2 (1,238)            | 16,533  | 89,742           | 22.4 (2,013)            |
| 50-59                    | 15,027  | 81,059           | 12.0 (974)              | 14,642  | 77,962           | 19.6 (1,530)            |
| 60-69                    | 10,174  | 54,355           | 8.7 (472)               | 10,229  | 54,471           | 14.8 (805)              |
| 70-79                    | 6,720   | 34,274           | 13.0 (447)              | 7,408   | 37,536           | 18.3 (688)              |
| ≥ 80                     | 3,482   | 17,009           | 28.9 (491)              | 5,313   | 28,290           | 34.4 (974)              |
| <b>Diabetes</b>          |         |                  |                         |         |                  |                         |
| 0-19                     | 19,025  | 144,155          | 0.5 (68)                | 18,190  | 138,186          | 0.7 (90)                |
| 20-39                    | 28,799  | 165,115          | 3.0 (503)               | 30,406  | 184,616          | 4.2 (775)               |
| 40-49                    | 18,193  | 100,104          | 12.4 (1,246)            | 19,617  | 112,231          | 9.9 (1,112)             |
| 50-59                    | 15,419  | 80,259           | 30.1 (2,417)            | 17,181  | 92,695           | 20.7 (1,917)            |
| 60-69                    | 9,394   | 45,589           | 45.7 (2,084)            | 10,854  | 55,408           | 34.4 (1,906)            |
| 70-79                    | 5,427   | 25,396           | 52.2 (1,326)            | 6,966   | 33,383           | 41.8 (1,395)            |
| ≥ 80                     | 2,840   | 13,550           | 44.1 (597)              | 5,074   | 26,909           | 32.6 (876)              |
| <b>Arthritis</b>         |         |                  |                         |         |                  |                         |
| 0-19                     | 19,032  | 144,320          | 0.3 (49)                | 18,205  | 138,450          | 0.5 (68)                |
| 20-39                    | 28,827  | 165,354          | 2.9 (477)               | 30,425  | 185,391          | 3.4 (625)               |
| 40-49                    | 18,202  | 99,821           | 13.0 (1,298)            | 19,464  | 109,658          | 14.8 (1,628)            |
| 50-59                    | 15,324  | 79,753           | 26.6 (2,120)            | 16,304  | 83,158           | 37.0 (3,079)            |
| 60-69                    | 9,295   | 45,576           | 41.1 (1,874)            | 9,227   | 43,244           | 56.8 (2,458)            |
| 70-79                    | 5,193   | 23,106           | 56.3 (1,300)            | 5,185   | 22,090           | 72.3 (1,598)            |
| ≥ 80                     | 2,317   | 9,836            | 65.9 (648)              | 3,252   | 14,434           | 79.4 (1,146)            |

**Supplementary table C.** Incidence of twenty chronic conditions considered individually  
(continued 1)

| Condition<br>age (years)         | Men     |                  |                         | Women   |                  |                         |
|----------------------------------|---------|------------------|-------------------------|---------|------------------|-------------------------|
|                                  | Persons | Person-<br>years | Incidence<br>rate * (n) | Persons | Person-<br>years | Incidence<br>rate * (n) |
| <b>Cancer</b>                    |         |                  |                         |         |                  |                         |
| 0-19                             | 19,020  | 144,181          | 0.3 (40)                | 18,180  | 138,347          | 0.6 (84)                |
| 20-39                            | 28,832  | 166,077          | 1.5 (241)               | 29,734  | 176,247          | 6.1 (1,079)             |
| 40-49                            | 18,402  | 103,035          | 5.2 (534)               | 18,658  | 105,898          | 10.1 (1,072)            |
| 50-59                            | 15,899  | 85,763           | 13.4 (1,145)            | 16,361  | 89,149           | 14.8 (1,321)            |
| 60-69                            | 9,821   | 49,157           | 30.7 (1,507)            | 10,480  | 54,117           | 22.5 (1,215)            |
| 70-79                            | 5,146   | 23,169           | 55.3 (1,281)            | 6,552   | 31,563           | 33.7 (1,065)            |
| ≥ 80                             | 2,112   | 9,137            | 64.7 (591)              | 4,411   | 21,933           | 38.0 (833)              |
| <b>Cardiac arrhythmias</b>       |         |                  |                         |         |                  |                         |
| 0-19                             | 19,008  | 143,802          | 1.2 (170)               | 18,203  | 137,966          | 1.7 (228)               |
| 20-39                            | 28,736  | 164,530          | 3.6 (590)               | 30,250  | 181,665          | 6.7 (1,216)             |
| 40-49                            | 18,324  | 102,268          | 7.1 (722)               | 19,444  | 110,842          | 9.3 (1,036)             |
| 50-59                            | 15,939  | 85,675           | 15.8 (1,354)            | 17,211  | 94,404           | 13.5 (1,274)            |
| 60-69                            | 10,068  | 50,190           | 34.7 (1,741)            | 11,262  | 58,346           | 22.9 (1,337)            |
| 70-79                            | 5,514   | 24,370           | 71.4 (1,741)            | 7,095   | 33,211           | 47.1 (1,563)            |
| ≥ 80                             | 2,193   | 8,604            | 122.9 (1,057)           | 4,365   | 20,213           | 85.6 (1,731)            |
| <b>Asthma</b>                    |         |                  |                         |         |                  |                         |
| 0-19                             | 17,856  | 126,216          | 11.1 (1,395)            | 17,443  | 125,314          | 11.4 (1,428)            |
| 20-39                            | 27,126  | 155,022          | 4.0 (624)               | 28,383  | 168,182          | 8.4 (1,409)             |
| 40-49                            | 18,102  | 101,654          | 3.7 (376)               | 18,845  | 107,595          | 7.2 (770)               |
| 50-59                            | 16,129  | 89,329           | 3.2 (289)               | 16,920  | 94,186           | 6.3 (589)               |
| 60-69                            | 10,930  | 58,658           | 3.6 (211)               | 11,535  | 62,226           | 6.1 (379)               |
| 70-79                            | 7,051   | 36,059           | 4.6 (167)               | 7,987   | 41,216           | 5.5 (228)               |
| ≥ 80                             | 3,741   | 18,815           | 4.8 (90)                | 5,878   | 32,584           | 5.1 (166)               |
| <b>Coronary artery disease</b>   |         |                  |                         |         |                  |                         |
| 0-19                             | 19,050  | 144,593          | 0.0 (0)                 | 18,227  | 138,785          | 0.0 (0)                 |
| 20-39                            | 28,982  | 167,484          | 0.5 (79)                | 30,647  | 188,499          | 0.3 (50)                |
| 40-49                            | 18,565  | 104,424          | 4.1 (432)               | 20,213  | 117,920          | 1.5 (177)               |
| 50-59                            | 15,875  | 85,866           | 11.2 (963)              | 18,177  | 101,860          | 4.4 (446)               |
| 60-69                            | 9,540   | 47,996           | 23.1 (1,108)            | 11,891  | 62,970           | 11.2 (703)              |
| 70-79                            | 5,081   | 23,713           | 39.1 (927)              | 7,473   | 37,099           | 21.0 (779)              |
| ≥ 80                             | 2,213   | 10,046           | 49.8 (500)              | 4,868   | 25,325           | 33.4 (845)              |
| <b>Substance abuse disorders</b> |         |                  |                         |         |                  |                         |
| 0-19                             | 18,850  | 142,916          | 3.8 (545)               | 18,083  | 137,309          | 3.2 (443)               |
| 20-39                            | 28,004  | 157,109          | 7.4 (1,159)             | 29,846  | 179,474          | 5.1 (910)               |
| 40-49                            | 18,038  | 100,943          | 5.8 (582)               | 19,722  | 114,415          | 3.3 (381)               |
| 50-59                            | 16,085  | 89,151           | 5.1 (451)               | 18,013  | 101,745          | 2.5 (257)               |
| 60-69                            | 11,001  | 59,373           | 3.7 (220)               | 12,398  | 67,817           | 1.6 (108)               |
| 70-79                            | 7,194   | 37,259           | 3.4 (125)               | 8,599   | 44,899           | 1.6 (70)                |
| ≥ 80                             | 3,882   | 19,697           | 3.1 (61)                | 6,325   | 35,542           | 1.2 (41)                |

**Supplementary table C.** Incidence of twenty chronic conditions considered individually  
(continued 2)

| Condition<br>age (years)                     | Men     |                  |                         | Women   |                  |                         |
|----------------------------------------------|---------|------------------|-------------------------|---------|------------------|-------------------------|
|                                              | Persons | Person-<br>years | Incidence<br>rate * (n) | Persons | Person-<br>years | Incidence<br>rate * (n) |
| <b>Chronic obstructive pulmonary disease</b> |         |                  |                         |         |                  |                         |
| 0-19                                         | 18,973  | 142,682          | 1.9 (267)               | 18,140  | 136,992          | 1.9 (263)               |
| 20-39                                        | 28,674  | 164,415          | 2.3 (376)               | 30,052  | 181,106          | 4.5 (811)               |
| 40-49                                        | 18,348  | 103,031          | 4.2 (430)               | 19,432  | 111,533          | 6.3 (704)               |
| 50-59                                        | 16,170  | 88,965           | 6.7 (600)               | 17,425  | 96,719           | 7.8 (756)               |
| 60-69                                        | 10,615  | 55,796           | 11.6 (648)              | 11,556  | 61,640           | 10.9 (670)              |
| 70-79                                        | 6,439   | 32,418           | 17.2 (559)              | 7,661   | 38,688           | 15.7 (608)              |
| ≥ 80                                         | 3,234   | 15,771           | 28.5 (449)              | 5,397   | 29,472           | 19.3 (568)              |
| <b>Osteoporosis</b>                          |         |                  |                         |         |                  |                         |
| 0-19                                         | 19,048  | 144,579          | <0.1 (5)                | 18,226  | 138,759          | <0.1 (5)                |
| 20-39                                        | 28,982  | 167,571          | 0.2 (41)                | 30,631  | 188,380          | 0.3 (58)                |
| 40-49                                        | 18,740  | 106,337          | 0.5 (53)                | 20,191  | 117,986          | 1.0 (119)               |
| 50-59                                        | 16,745  | 93,377           | 1.1 (99)                | 18,194  | 101,448          | 6.2 (628)               |
| 60-69                                        | 11,326  | 60,849           | 2.4 (144)               | 11,750  | 61,299           | 16.1 (987)              |
| 70-79                                        | 7,280   | 37,236           | 5.5 (206)               | 7,330   | 34,844           | 29.7 (1,034)            |
| ≥ 80                                         | 3,825   | 18,929           | 10.5 (198)              | 4,818   | 23,172           | 47.8 (1,107)            |
| <b>Chronic kidney disease</b>                |         |                  |                         |         |                  |                         |
| 0-19                                         | 19,007  | 143,995          | 0.3 (37)                | 18,200  | 138,410          | 0.2 (33)                |
| 20-39                                        | 28,896  | 166,662          | 0.8 (138)               | 30,555  | 187,402          | 0.9 (173)               |
| 40-49                                        | 18,626  | 105,218          | 1.9 (200)               | 20,119  | 117,418          | 1.4 (170)               |
| 50-59                                        | 16,546  | 91,726           | 4.2 (386)               | 18,264  | 102,861          | 3.1 (317)               |
| 60-69                                        | 11,049  | 58,474           | 10.1 (589)              | 12,300  | 66,388           | 6.8 (452)               |
| 70-79                                        | 6,896   | 34,352           | 22.4 (768)              | 8,330   | 42,336           | 15.0 (634)              |
| ≥ 80                                         | 3,462   | 16,119           | 52.2 (842)              | 5,916   | 31,586           | 31.6 (999)              |
| <b>Stroke</b>                                |         |                  |                         |         |                  |                         |
| 0-19                                         | 19,044  | 144,494          | 0.1 (11)                | 18,225  | 138,714          | 0.1 (10)                |
| 20-39                                        | 28,966  | 167,513          | 0.2 (32)                | 30,625  | 188,279          | 0.3 (54)                |
| 40-49                                        | 18,723  | 106,112          | 0.9 (98)                | 20,195  | 118,033          | 0.9 (101)               |
| 50-59                                        | 16,663  | 92,757           | 2.3 (215)               | 18,316  | 103,296          | 1.9 (200)               |
| 60-69                                        | 11,095  | 58,984           | 7.1 (420)               | 12,326  | 66,626           | 5.3 (352)               |
| 70-79                                        | 6,787   | 33,726           | 18.1 (609)              | 8,155   | 41,474           | 12.9 (536)              |
| ≥ 80                                         | 3,302   | 16,079           | 26.9 (432)              | 5,578   | 29,934           | 24.5 (734)              |
| <b>Congestive heart failure</b>              |         |                  |                         |         |                  |                         |
| 0-19                                         | 19,049  | 144,577          | <0.1 (3)                | 18,225  | 138,741          | <0.1 (1)                |
| 20-39                                        | 28,991  | 167,636          | 0.1 (23)                | 30,643  | 188,550          | 0.1 (27)                |
| 40-49                                        | 18,748  | 106,429          | 0.6 (60)                | 20,247  | 118,489          | 0.4 (44)                |
| 50-59                                        | 16,715  | 93,129           | 2.0 (189)               | 18,420  | 104,263          | 1.1 (113)               |
| 60-69                                        | 11,200  | 60,021           | 4.7 (284)               | 12,468  | 67,862           | 3.4 (228)               |
| 70-79                                        | 7,023   | 35,739           | 14.7 (524)              | 8,373   | 43,018           | 10.7 (462)              |
| ≥ 80                                         | 3,454   | 16,474           | 44.4 (732)              | 5,644   | 30,042           | 39.2 (1,178)            |

**Supplementary table C.** Incidence of twenty chronic conditions considered individually (continued 3)

| Condition<br>age (years)            | Men     |                  |                         | Women   |                  |                         |
|-------------------------------------|---------|------------------|-------------------------|---------|------------------|-------------------------|
|                                     | Persons | Person-<br>years | Incidence<br>rate * (n) | Persons | Person-<br>years | Incidence<br>rate * (n) |
| <b>Dementia</b>                     |         |                  |                         |         |                  |                         |
| 0-19                                | 19,045  | 144,233          | 0.7 (95)                | 18,224  | 138,612          | 0.5 (65)                |
| 20-39                               | 28,927  | 167,098          | 0.5 (90)                | 30,613  | 188,229          | 0.4 (74)                |
| 40-49                               | 18,730  | 106,234          | 0.8 (87)                | 20,234  | 118,263          | 0.7 (80)                |
| 50-59                               | 16,732  | 93,398           | 1.2 (113)               | 18,391  | 104,060          | 1.2 (122)               |
| 60-69                               | 11,339  | 61,016           | 2.4 (147)               | 12,527  | 68,389           | 2.2 (152)               |
| 70-79                               | 7,250   | 37,024           | 11.5 (424)              | 8,523   | 44,015           | 9.0 (394)               |
| ≥ 80                                | 3,651   | 17,816           | 37.4 (666)              | 5,684   | 30,237           | 43.8 (1,324)            |
| <b>Schizophrenia</b>                |         |                  |                         |         |                  |                         |
| 0-19                                | 19,043  | 144,539          | 0.2 (32)                | 18,221  | 138,684          | 0.2 (28)                |
| 20-39                               | 28,905  | 166,386          | 1.1 (177)               | 30,559  | 187,680          | 0.6 (116)               |
| 40-49                               | 18,656  | 105,803          | 0.6 (68)                | 20,132  | 117,772          | 0.5 (53)                |
| 50-59                               | 16,695  | 93,305           | 0.5 (49)                | 18,333  | 103,725          | 0.6 (67)                |
| 60-69                               | 11,357  | 61,286           | 1.0 (59)                | 12,474  | 68,212           | 0.9 (61)                |
| 70-79                               | 7,338   | 38,011           | 2.4 (92)                | 8,586   | 44,755           | 2.7 (121)               |
| ≥ 80                                | 3,892   | 19,550           | 11.3 (221)              | 6,114   | 34,000           | 13.1 (444)              |
| <b>Hepatitis</b>                    |         |                  |                         |         |                  |                         |
| 0-19                                | 19,041  | 144,470          | 0.1 (17)                | 18,216  | 138,646          | 0.1 (20)                |
| 20-39                               | 28,927  | 166,978          | 0.7 (118)               | 30,557  | 187,564          | 0.6 (114)               |
| 40-49                               | 18,620  | 105,303          | 1.3 (136)               | 20,126  | 117,719          | 0.6 (76)                |
| 50-59                               | 16,599  | 92,627           | 1.1 (105)               | 18,340  | 103,834          | 0.6 (58)                |
| 60-69                               | 11,293  | 61,018           | 0.8 (48)                | 12,506  | 68,411           | 0.9 (62)                |
| 70-79                               | 7,353   | 38,053           | 0.6 (24)                | 8,634   | 45,080           | 0.6 (25)                |
| ≥ 80                                | 3,936   | 20,045           | 0.4 (9)                 | 6,350   | 35,622           | 0.3 (12)                |
| <b>Autism spectrum disorder</b>     |         |                  |                         |         |                  |                         |
| 0-19                                | 19,031  | 144,197          | 0.3 (37)                | 18,224  | 138,664          | 0.1 (16)                |
| 20-39                               | 28,972  | 167,636          | <0.1 (6)                | 30,643  | 188,651          | <0.1 (2)                |
| 40-49                               | 18,778  | 106,682          | <0.1 (3)                | 20,275  | 118,760          | 0.0 (0)                 |
| 50-59                               | 16,810  | 94,079           | 0.0 (0)                 | 18,480  | 104,783          | 0.0 (0)                 |
| 60-69                               | 11,424  | 61,702           | 0.0 (0)                 | 12,603  | 69,065           | 0.0 (0)                 |
| 70-79                               | 7,409   | 38,416           | 0.0 (0)                 | 8,704   | 45,493           | 0.0 (0)                 |
| ≥ 80                                | 3,966   | 20,174           | 0.0 (0)                 | 6,383   | 35,849           | 0.0 (0)                 |
| <b>Human immunodeficiency virus</b> |         |                  |                         |         |                  |                         |
| 0-19                                | 19,049  | 144,591          | <0.1 (1)                | 18,227  | 138,772          | <0.1 (1)                |
| 20-39                               | 28,985  | 167,674          | 0.1 (20)                | 30,646  | 188,628          | 0.1 (11)                |
| 40-49                               | 18,756  | 106,511          | 0.1 (13)                | 20,265  | 118,694          | <0.1 (2)                |
| 50-59                               | 16,794  | 94,006           | <0.1 (3)                | 18,476  | 104,777          | 0.0 (0)                 |
| 60-69                               | 11,420  | 61,680           | <0.1 (1)                | 12,603  | 69,065           | 0.0 (0)                 |
| 70-79                               | 7,408   | 38,407           | <0.1 (1)                | 8,704   | 45,489           | <0.1 (1)                |
| ≥ 80                                | 3,964   | 20,171           | 0.0 (0)                 | 6,383   | 35,849           | 0.0 (0)                 |

\* Incidence rates are reported per 1,000 person-years, and are calculated by dividing the number of observed new cases in parentheses by the number of observed person-years of risk within each age and sex stratum. The 20 chronic conditions are listed in decreasing order of frequency (by overall age- and sex-standardized prevalence). (Rocca et., al. 2013)

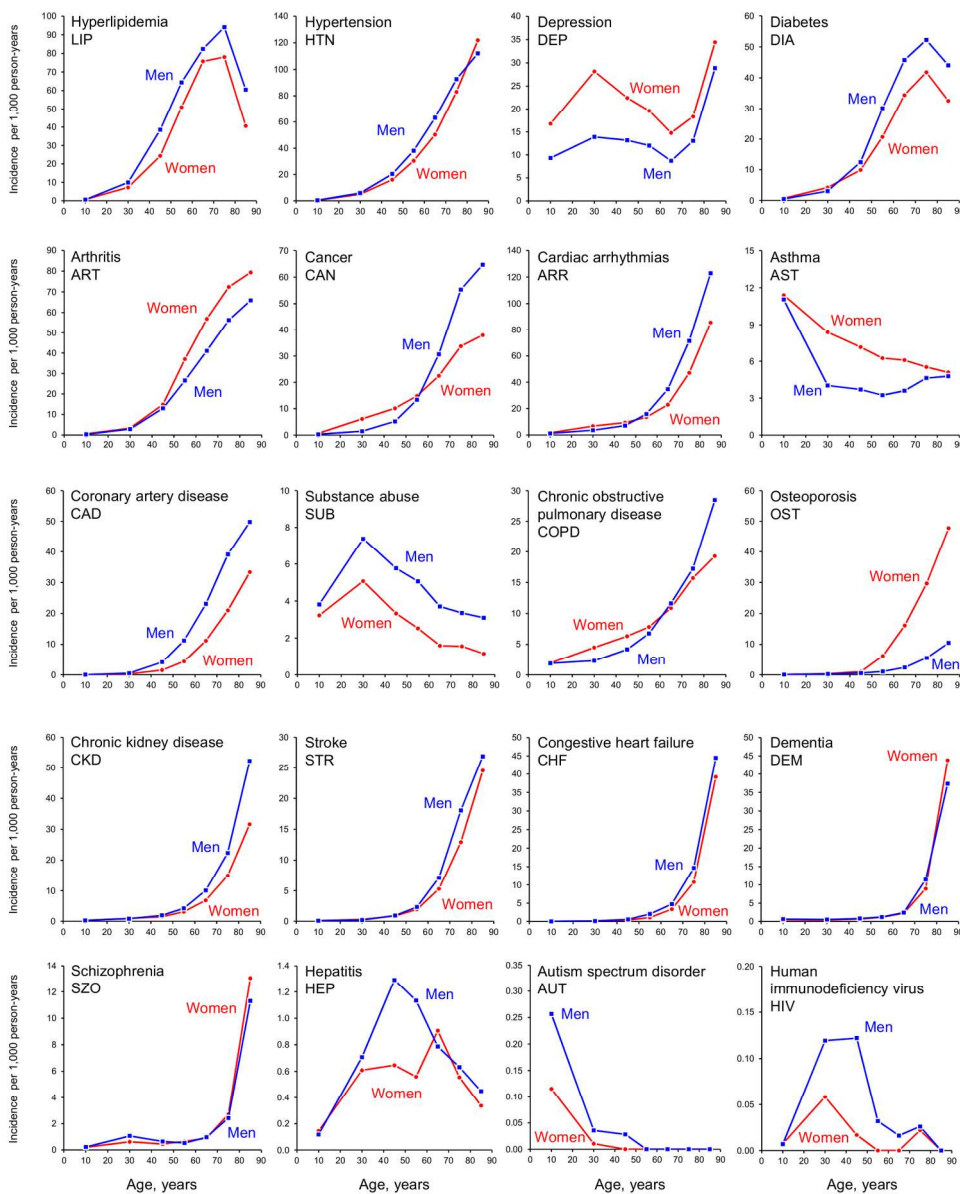

Figure 1. Age- and sex-specific incidence rates (per 1,000 person-years) of the 20 chronic conditions considered separately. The 20 panels are presented by rows in decreasing order of frequency (by overall age- and sex-standardized prevalence). 16 173x215mm (300 x 300 DPI)

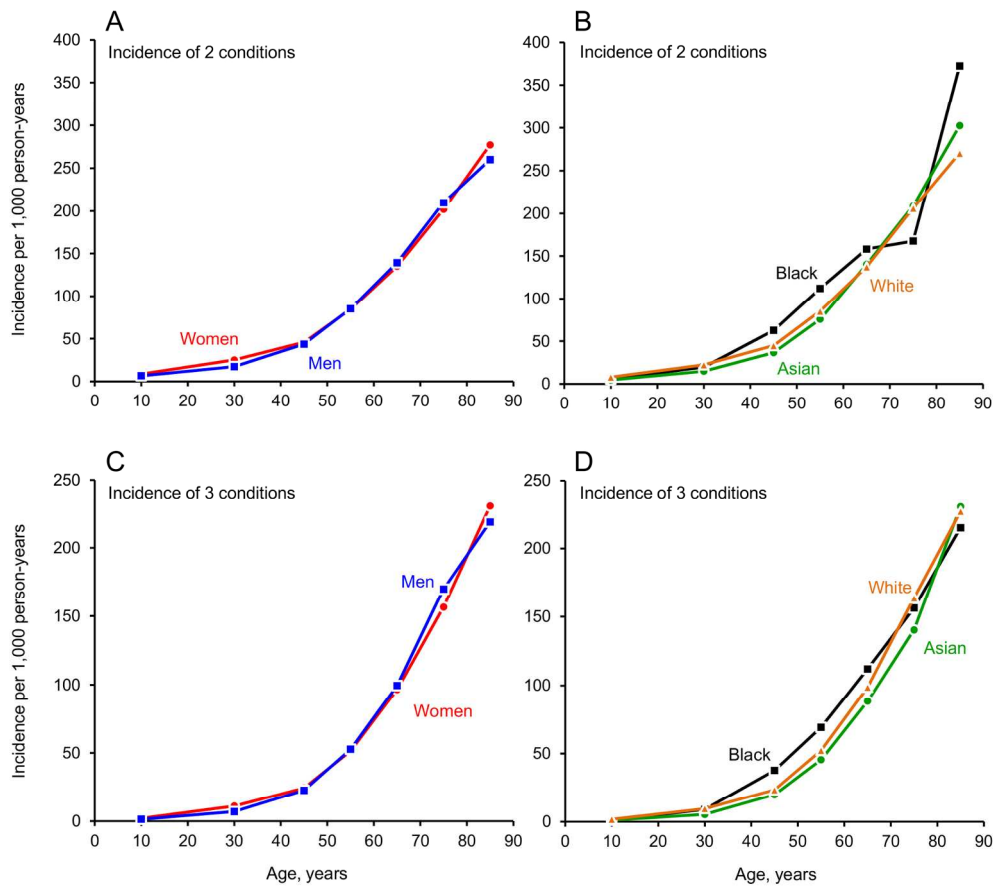

Figure 2. Incidence rates (per 1,000 person-years) of 2 chronic conditions (second condition in a dyad) and of 3 chronic conditions (third condition in a triad) in men and women separately (panels A and C), and stratified by ethnicity (panels B and D).  
173x154mm (300 x 300 DPI)



## Appendix 1: Supplementary tables A-C [posted as supplied by the authors]

## Supplementary table A. List of the twenty chronic conditions selected by the US-DHHS \*

| Description †           | Acronym<br>or<br>Abbreviation | CCC ‡    | CMS (ICD-9 codes) §                                                                                                                                                                                                                                                                                                                                                                                                                                                                                                                                           |
|-------------------------|-------------------------------|----------|---------------------------------------------------------------------------------------------------------------------------------------------------------------------------------------------------------------------------------------------------------------------------------------------------------------------------------------------------------------------------------------------------------------------------------------------------------------------------------------------------------------------------------------------------------------|
| Hyperlipidemia          | LIP                           | 53       | 272.0, 272.1, 272.2, 272.3, 272.4                                                                                                                                                                                                                                                                                                                                                                                                                                                                                                                             |
| Hypertension            | HTN                           | 98, 99   | 401.0, 401.1, 401.9, 402.00, 402.01, 402.10, 402.11, 402.90, 402.91, 403.00, 403.01, 403.10, 403.11, 403.90, 403.91, 404.00, 404.01, 404.02, 404.03, 404.10, 404.11, 404.12, 404.13, 404.90, 404.91, 404.92, 404.93, 405.01, 405.09, 405.11, 405.19, 405.91, 405.99, 362.11, 437.2                                                                                                                                                                                                                                                                            |
| Depression              | DEP                           | 657      | 296.20, 296.21, 296.22, 296.23, 296.24, 296.25, 296.26, 296.30, 296.31, 296.32, 296.33, 296.34, 296.35, 296.36, 296.51, 296.52, 296.53, 296.54, 296.55, 296.56, 296.60, 296.61, 296.62, 296.63, 296.64, 296.65, 296.66, 296.89, 298.0, 300.4, 309.1, 311                                                                                                                                                                                                                                                                                                      |
| Diabetes                | DIA                           | 49,50    | 249.00, 249.01, 249.10, 249.11, 249.20, 249.21, 249.30, 249.31, 249.40, 249.41, 249.50, 249.51, 249.60, 249.61, 249.70, 249.71, 249.80, 249.81, 249.90, 249.91, 250.00, 250.01, 250.02, 250.03, 250.10, 250.11, 250.12, 250.13, 250.20, 250.21, 250.22, 250.23, 250.30, 250.31, 250.32, 250.33, 250.40, 250.41, 250.42, 250.43, 250.50, 250.51, 250.52, 250.53, 250.60, 250.61, 250.62, 250.63, 250.70, 250.71, 250.72, 250.73, 250.80, 250.81, 250.82, 250.83, 250.90, 250.91, 250.92, 250.93, 357.2, 362.01, 362.02, 362.03, 362.04, 362.05, 362.06, 366.41 |
| Arthritis               | ART                           | 202, 203 | 714.0, 714.1, 714.2, 714.30, 714.31, 714.32, 714.33, 715.00, 715.04, 715.09, 715.10, 715.11, 715.12, 715.13, 715.14, 715.15, 715.16, 715.17, 715.18, 715.20, 715.21, 715.22, 715.23, 715.24, 715.25, 715.26, 715.27, 715.28, 715.30, 715.31, 715.32, 715.33, 715.34, 715.35, 715.36, 715.37, 715.38, 715.80, 715.89, 715.90, 715.91, 715.92, 715.93, 715.94, 715.95, 715.96, 715.97, 715.98, 720.0, 721.0, 721.1, 721.2, 721.3, 721.90, 721.91                                                                                                                |
| Cancer                  | CAN                           | 11-43    | Female breast cancer: 174.0, 174.1, 174.2, 174.3, 174.4, 174.5, 174.6, 174.8, 174.9, 175.0, 175.9, 233.0, V10.3. Colorectal cancer: 154.0, 154.1, 153.0, 153.1, 153.2, 153.3, 153.4, 153.5, 153.6, 153.7, 153.8, 153.9, 230.3, 230.4, V10.05. Prostate cancer: 185, 233.4, V10.46. Lung cancer: 162.2, 162.3, 162.4, 162.5, 162.8, 162.9, 231.2, V10.11.                                                                                                                                                                                                      |
| Cardiac arrhythmias     | ARR                           | 105-106  | 427.31                                                                                                                                                                                                                                                                                                                                                                                                                                                                                                                                                        |
| Asthma                  | AST                           | 128      | 493.00, 493.01, 493.02, 493.10, 493.11, 493.12, 493.20, 493.21, 493.22, 493.81, 493.82, 493.90, 493.91, 493.92                                                                                                                                                                                                                                                                                                                                                                                                                                                |
| Coronary artery disease | CAD                           | 100, 101 | 410.00, 410.01, 410.02, 410.10, 410.11, 410.12, 410.20, 410.21, 410.22, 410.30, 410.31, 410.32, 410.40, 410.41, 410.42, 410.50, 410.51, 410.52, 410.60, 410.61, 410.62, 410.70, 410.71, 410.72, 410.80, 410.81, 410.82, 410.90, 410.91, 410.92, 411.0, 411.1, 411.81, 411.89, 412, 413.0, 413.1, 413.9, 414.00, 414.01, 414.02, 414.03, 414.04, 414.05, 414.06, 414.07, 414.12, 414.2, 414.3, 414.8, 414.9                                                                                                                                                    |

**Supplementary table A.** List of the twenty chronic conditions selected by the US-DHHS \*  
(continued)

| Description †                                               | Acronym<br>or<br>Abbreviation | CCC ‡               | CMS (ICD-9 codes) §                                                                                                                                                                                                                                                                                                                                                                                                                                                                                                                                                                                                                                                                                                       |
|-------------------------------------------------------------|-------------------------------|---------------------|---------------------------------------------------------------------------------------------------------------------------------------------------------------------------------------------------------------------------------------------------------------------------------------------------------------------------------------------------------------------------------------------------------------------------------------------------------------------------------------------------------------------------------------------------------------------------------------------------------------------------------------------------------------------------------------------------------------------------|
| Substance abuse disorders (drug and alcohol)                | SUB                           | 660-661             | Not applicable                                                                                                                                                                                                                                                                                                                                                                                                                                                                                                                                                                                                                                                                                                            |
| Chronic obstructive pulmonary disease                       | COPD                          | 127                 | 490, 491.0, 491.1, 491.20, 491.21, 491.22, 491.8, 491.9, 492.0, 492.8, 494.0, 494.1, 496                                                                                                                                                                                                                                                                                                                                                                                                                                                                                                                                                                                                                                  |
| Osteoporosis                                                | OST                           | 206                 | 733.00, 733.01, 733.02, 733.03, 733.09                                                                                                                                                                                                                                                                                                                                                                                                                                                                                                                                                                                                                                                                                    |
| Chronic kidney disease                                      | CKD                           | 158                 | 016.00, 016.01, 016.02, 016.03, 016.04, 016.05, 016.06, 095.4, 189.0, 189.9, 223.0, 236.91, 249.40, 249.41, 250.40, 250.41, 250.42, 250.43, 271.4, 274.10, 283.11, 403.01, 403.11, 403.91, 404.02, 404.03, 404.12, 404.13, 404.92, 404.93, 440.1, 442.1, 572.4, 580.0, 580.4, 580.81, 580.89, 580.9, 581.0, 581.1, 581.2, 581.3, 581.81, 581.89, 581.9, 582.0, 582.1, 582.2, 582.4, 582.81, 582.89, 582.9, 583.0, 583.1, 583.2, 583.4, 583.6, 583.7, 583.81, 583.89, 583.9, 584.5, 584.6, 584.7, 584.8, 584.9, 585.1, 585.2, 585.3, 585.4, 585.5, 585.6, 585.9, 586, 587, 588.0, 588.1, 588.81, 588.89, 588.9, 591, 753.12, 753.13, 753.14, 753.15, 753.16, 753.17, 753.19, 753.20, 753.21, 753.22, 753.23, 753.29, 794.4 |
| Stroke                                                      | STR                           | 109-112             | 430, 431, 433.01, 433.11, 433.21, 433.31, 433.81, 433.91, 434.00, 434.01, 434.10, 434.11, 434.90, 434.91, 435.0, 435.1, 435.3, 435.8, 435.9, 436, 997.02                                                                                                                                                                                                                                                                                                                                                                                                                                                                                                                                                                  |
| Congestive heart failure                                    | CHF                           | 108                 | 398.91, 402.01, 402.11, 402.91, 404.01, 404.11, 404.91, 404.03, 404.13, 404.93, 428.0, 428.1, 428.20, 428.21, 428.22, 428.23, 428.30, 428.31, 428.32, 428.33, 428.40, 428.41, 428.42, 428.43, 428.9                                                                                                                                                                                                                                                                                                                                                                                                                                                                                                                       |
| Dementia (including Alzheimer's and other senile dementias) | DEM                           | 653                 | 331.0, 331.11, 331.19, 331.2, 331.7, 290.0, 290.10, 290.11, 290.12, 290.13, 290.20, 290.21, 290.3, 290.40, 290.41, 290.42, 290.43, 294.0, 294.10, 294.11, 294.8, 797                                                                                                                                                                                                                                                                                                                                                                                                                                                                                                                                                      |
| Schizophrenia                                               | SZO                           | 659                 | Not applicable                                                                                                                                                                                                                                                                                                                                                                                                                                                                                                                                                                                                                                                                                                            |
| Hepatitis                                                   | HEP                           | 6                   | Not applicable                                                                                                                                                                                                                                                                                                                                                                                                                                                                                                                                                                                                                                                                                                            |
| Autism spectrum disorder                                    | AUT                           | 299.00,<br>299.01 ‖ | Not applicable                                                                                                                                                                                                                                                                                                                                                                                                                                                                                                                                                                                                                                                                                                            |
| Human immunodeficiency virus (HIV)                          | HIV                           | 5                   | Not applicable                                                                                                                                                                                                                                                                                                                                                                                                                                                                                                                                                                                                                                                                                                            |

\* CCC = Clinical Classification Codes; CMS = Centers for Medicare and Medicaid Services; ICD-9 = International Classification of Diseases, 9<sup>th</sup> revision; US-DHHS = US Department of Health and Human Services.

† The 20 conditions were defined by the US-DHHS as detailed elsewhere. (Goodman et al., 2013) Each condition is defined by having a code in either the CCC group of codes or the CMS group of codes. Conditions are listed in decreasing order of frequency (by overall age and sex standardized prevalence; same order as in Figure 1).

‡ We list the CCC chapters developed by the Agency for Healthcare Research and Quality (AHRQ). Each CCC chapter includes a list of ICD-9 codes as detailed elsewhere. (Cohen et al., 2009)

§ We list the ICD-9 codes defined in the Chronic Conditions Data Warehouse of the CMS.

‖ Autism-spectrum disorder is not defined in either the CCC or the CMS code groupings, but rather is defined by two distinct ICD-9 codes.

**Supplementary table B.** Total US population used for direct standardization of incidence rates

| Age                                       | Men                       |                      |                          | Women                     |                      |                          | Adjusting population <sup>§</sup> |
|-------------------------------------------|---------------------------|----------------------|--------------------------|---------------------------|----------------------|--------------------------|-----------------------------------|
|                                           | US Total (n) <sup>*</sup> | Prev. % <sup>†</sup> | At risk (n) <sup>‡</sup> | US Total (n) <sup>*</sup> | Prev. % <sup>†</sup> | At risk (n) <sup>‡</sup> |                                   |
| <b>Prevalence of 2 chronic conditions</b> |                           |                      |                          |                           |                      |                          |                                   |
| 0-19 y                                    | 42,592                    | 1.26                 | 42,054                   | 40,675                    | 1.40                 | 40,108                   | 82,162                            |
| 20-39 y                                   | 41,688                    | 6.98                 | 38,779                   | 41,140                    | 8.74                 | 37,546                   | 76,325                            |
| 40-49 y                                   | 21,603                    | 20.37                | 17,202                   | 21,995                    | 19.71                | 17,660                   | 34,862                            |
| 50-59 y                                   | 20,456                    | 38.13                | 12,657                   | 21,505                    | 35.77                | 13,813                   | 26,470                            |
| 60-69 y                                   | 13,930                    | 59.41                | 5,654                    | 15,323                    | 58.35                | 6,381                    | 12,036                            |
| 70-79 y                                   | 7,427                     | 79.73                | 1,506                    | 9,170                     | 78.27                | 1,993                    | 3,498                             |
| ≥ 80 y                                    | 4,084                     | 87.86                | 496                      | 7,152                     | 86.41                | 972                      | 1,467                             |
| <b>Prevalence of 3 chronic conditions</b> |                           |                      |                          |                           |                      |                          |                                   |
| 0-19 y                                    | 42,592                    | 0.17                 | 42,521                   | 40,675                    | 0.25                 | 40,575                   | 83,096                            |
| 20-39 y                                   | 41,688                    | 2.12                 | 40,805                   | 41,140                    | 2.57                 | 40,083                   | 80,887                            |
| 40-49 y                                   | 21,603                    | 9.40                 | 19,572                   | 21,995                    | 8.55                 | 20,115                   | 39,687                            |
| 50-59 y                                   | 20,456                    | 21.06                | 16,148                   | 21,505                    | 19.30                | 17,355                   | 33,503                            |
| 60-69 y                                   | 13,930                    | 40.88                | 8,235                    | 15,323                    | 38.32                | 9,452                    | 17,687                            |
| 70-79 y                                   | 7,427                     | 65.11                | 2,591                    | 9,170                     | 62.05                | 3,480                    | 6,071                             |
| ≥ 80 y                                    | 4,084                     | 78.93                | 861                      | 7,152                     | 74.17                | 1,848                    | 2,708                             |

\* Population (in thousands) of the entire United States from the decennial census of 2010.

† Prevalence of 2 or 3 chronic conditions from our previous study in Olmsted County, MN. (Rocca et., al, In Press)

‡ Total population at risk (in thousands) after removing the estimated prevalent persons who have already reached 2 or 3 chronic conditions.

§ The total population (in thousands) used in Tables 1 and 2 for direct standardization.

**Supplementary table C.** Incidence of twenty chronic conditions considered individually

| Condition<br>age (years) | Men     |                  |                         | Women   |                  |                         |
|--------------------------|---------|------------------|-------------------------|---------|------------------|-------------------------|
|                          | Persons | Person-<br>years | Incidence<br>rate * (n) | Persons | Person-<br>years | Incidence<br>rate * (n) |
| <b>Hyperlipidemia</b>    |         |                  |                         |         |                  |                         |
| 0-19                     | 18,996  | 143,882          | 0.6 (91)                | 18,174  | 138,140          | 0.7 (94)                |
| 20-39                    | 28,437  | 159,373          | 10.0 (1,586)            | 30,040  | 179,745          | 7.3 (1,311)             |
| 40-49                    | 16,512  | 82,705           | 38.5 (3,186)            | 18,328  | 99,834           | 24.3 (2,428)            |
| 50-59                    | 11,993  | 54,436           | 64.4 (3,504)            | 14,248  | 68,637           | 51.0 (3,500)            |
| 60-69                    | 6,023   | 25,216           | 82.4 (2,077)            | 7,111   | 30,967           | 75.7 (2,345)            |
| 70-79                    | 3,077   | 11,661           | 94.1 (1,097)            | 3,821   | 14,970           | 78.0 (1,168)            |
| ≥ 80                     | 1,712   | 7,163            | 60.5 (433)              | 3,319   | 15,777           | 40.6 (641)              |
| <b>Hypertension</b>      |         |                  |                         |         |                  |                         |
| 0-19                     | 19,029  | 144,237          | 0.5 (65)                | 18,215  | 138,569          | 0.4 (51)                |
| 20-39                    | 28,626  | 162,582          | 5.9 (954)               | 30,315  | 183,220          | 5.0 (908)               |
| 40-49                    | 17,289  | 92,372           | 20.4 (1,882)            | 18,790  | 105,079          | 16.0 (1,683)            |
| 50-59                    | 13,481  | 67,250           | 38.0 (2,556)            | 15,013  | 77,172           | 30.3 (2,341)            |
| 60-69                    | 7,077   | 31,540           | 63.2 (1,993)            | 7,971   | 36,990           | 50.3 (1,859)            |
| 70-79                    | 3,331   | 13,402           | 92.6 (1,241)            | 3,941   | 16,136           | 83.0 (1,339)            |
| ≥ 80                     | 1,354   | 5,198            | 112.0 (582)             | 2,053   | 7,919            | 121.9 (965)             |
| <b>Depression</b>        |         |                  |                         |         |                  |                         |
| 0-19                     | 18,794  | 139,315          | 9.3 (1,297)             | 17,774  | 131,126          | 16.8 (2,198)            |
| 20-39                    | 27,342  | 150,493          | 13.9 (2,091)            | 27,026  | 146,257          | 28.2 (4,118)            |
| 40-49                    | 17,234  | 94,033           | 13.2 (1,238)            | 16,533  | 89,742           | 22.4 (2,013)            |
| 50-59                    | 15,027  | 81,059           | 12.0 (974)              | 14,642  | 77,962           | 19.6 (1,530)            |
| 60-69                    | 10,174  | 54,355           | 8.7 (472)               | 10,229  | 54,471           | 14.8 (805)              |
| 70-79                    | 6,720   | 34,274           | 13.0 (447)              | 7,408   | 37,536           | 18.3 (688)              |
| ≥ 80                     | 3,482   | 17,009           | 28.9 (491)              | 5,313   | 28,290           | 34.4 (974)              |
| <b>Diabetes</b>          |         |                  |                         |         |                  |                         |
| 0-19                     | 19,025  | 144,155          | 0.5 (68)                | 18,190  | 138,186          | 0.7 (90)                |
| 20-39                    | 28,799  | 165,115          | 3.0 (503)               | 30,406  | 184,616          | 4.2 (775)               |
| 40-49                    | 18,193  | 100,104          | 12.4 (1,246)            | 19,617  | 112,231          | 9.9 (1,112)             |
| 50-59                    | 15,419  | 80,259           | 30.1 (2,417)            | 17,181  | 92,695           | 20.7 (1,917)            |
| 60-69                    | 9,394   | 45,589           | 45.7 (2,084)            | 10,854  | 55,408           | 34.4 (1,906)            |
| 70-79                    | 5,427   | 25,396           | 52.2 (1,326)            | 6,966   | 33,383           | 41.8 (1,395)            |
| ≥ 80                     | 2,840   | 13,550           | 44.1 (597)              | 5,074   | 26,909           | 32.6 (876)              |
| <b>Arthritis</b>         |         |                  |                         |         |                  |                         |
| 0-19                     | 19,032  | 144,320          | 0.3 (49)                | 18,205  | 138,450          | 0.5 (68)                |
| 20-39                    | 28,827  | 165,354          | 2.9 (477)               | 30,425  | 185,391          | 3.4 (625)               |
| 40-49                    | 18,202  | 99,821           | 13.0 (1,298)            | 19,464  | 109,658          | 14.8 (1,628)            |
| 50-59                    | 15,324  | 79,753           | 26.6 (2,120)            | 16,304  | 83,158           | 37.0 (3,079)            |
| 60-69                    | 9,295   | 45,576           | 41.1 (1,874)            | 9,227   | 43,244           | 56.8 (2,458)            |
| 70-79                    | 5,193   | 23,106           | 56.3 (1,300)            | 5,185   | 22,090           | 72.3 (1,598)            |
| ≥ 80                     | 2,317   | 9,836            | 65.9 (648)              | 3,252   | 14,434           | 79.4 (1,146)            |

**Supplementary table C.** Incidence of twenty chronic conditions considered individually  
(continued 1)

| Condition<br>age (years)         | Men     |                  |                         | Women   |                  |                         |
|----------------------------------|---------|------------------|-------------------------|---------|------------------|-------------------------|
|                                  | Persons | Person-<br>years | Incidence<br>rate * (n) | Persons | Person-<br>years | Incidence<br>rate * (n) |
| <b>Cancer</b>                    |         |                  |                         |         |                  |                         |
| 0-19                             | 19,020  | 144,181          | 0.3 (40)                | 18,180  | 138,347          | 0.6 (84)                |
| 20-39                            | 28,832  | 166,077          | 1.5 (241)               | 29,734  | 176,247          | 6.1 (1,079)             |
| 40-49                            | 18,402  | 103,035          | 5.2 (534)               | 18,658  | 105,898          | 10.1 (1,072)            |
| 50-59                            | 15,899  | 85,763           | 13.4 (1,145)            | 16,361  | 89,149           | 14.8 (1,321)            |
| 60-69                            | 9,821   | 49,157           | 30.7 (1,507)            | 10,480  | 54,117           | 22.5 (1,215)            |
| 70-79                            | 5,146   | 23,169           | 55.3 (1,281)            | 6,552   | 31,563           | 33.7 (1,065)            |
| ≥ 80                             | 2,112   | 9,137            | 64.7 (591)              | 4,411   | 21,933           | 38.0 (833)              |
| <b>Cardiac arrhythmias</b>       |         |                  |                         |         |                  |                         |
| 0-19                             | 19,008  | 143,802          | 1.2 (170)               | 18,203  | 137,966          | 1.7 (228)               |
| 20-39                            | 28,736  | 164,530          | 3.6 (590)               | 30,250  | 181,665          | 6.7 (1,216)             |
| 40-49                            | 18,324  | 102,268          | 7.1 (722)               | 19,444  | 110,842          | 9.3 (1,036)             |
| 50-59                            | 15,939  | 85,675           | 15.8 (1,354)            | 17,211  | 94,404           | 13.5 (1,274)            |
| 60-69                            | 10,068  | 50,190           | 34.7 (1,741)            | 11,262  | 58,346           | 22.9 (1,337)            |
| 70-79                            | 5,514   | 24,370           | 71.4 (1,741)            | 7,095   | 33,211           | 47.1 (1,563)            |
| ≥ 80                             | 2,193   | 8,604            | 122.9 (1,057)           | 4,365   | 20,213           | 85.6 (1,731)            |
| <b>Asthma</b>                    |         |                  |                         |         |                  |                         |
| 0-19                             | 17,856  | 126,216          | 11.1 (1,395)            | 17,443  | 125,314          | 11.4 (1,428)            |
| 20-39                            | 27,126  | 155,022          | 4.0 (624)               | 28,383  | 168,182          | 8.4 (1,409)             |
| 40-49                            | 18,102  | 101,654          | 3.7 (376)               | 18,845  | 107,595          | 7.2 (770)               |
| 50-59                            | 16,129  | 89,329           | 3.2 (289)               | 16,920  | 94,186           | 6.3 (589)               |
| 60-69                            | 10,930  | 58,658           | 3.6 (211)               | 11,535  | 62,226           | 6.1 (379)               |
| 70-79                            | 7,051   | 36,059           | 4.6 (167)               | 7,987   | 41,216           | 5.5 (228)               |
| ≥ 80                             | 3,741   | 18,815           | 4.8 (90)                | 5,878   | 32,584           | 5.1 (166)               |
| <b>Coronary artery disease</b>   |         |                  |                         |         |                  |                         |
| 0-19                             | 19,050  | 144,593          | 0.0 (0)                 | 18,227  | 138,785          | 0.0 (0)                 |
| 20-39                            | 28,982  | 167,484          | 0.5 (79)                | 30,647  | 188,499          | 0.3 (50)                |
| 40-49                            | 18,565  | 104,424          | 4.1 (432)               | 20,213  | 117,920          | 1.5 (177)               |
| 50-59                            | 15,875  | 85,866           | 11.2 (963)              | 18,177  | 101,860          | 4.4 (446)               |
| 60-69                            | 9,540   | 47,996           | 23.1 (1,108)            | 11,891  | 62,970           | 11.2 (703)              |
| 70-79                            | 5,081   | 23,713           | 39.1 (927)              | 7,473   | 37,099           | 21.0 (779)              |
| ≥ 80                             | 2,213   | 10,046           | 49.8 (500)              | 4,868   | 25,325           | 33.4 (845)              |
| <b>Substance abuse disorders</b> |         |                  |                         |         |                  |                         |
| 0-19                             | 18,850  | 142,916          | 3.8 (545)               | 18,083  | 137,309          | 3.2 (443)               |
| 20-39                            | 28,004  | 157,109          | 7.4 (1,159)             | 29,846  | 179,474          | 5.1 (910)               |
| 40-49                            | 18,038  | 100,943          | 5.8 (582)               | 19,722  | 114,415          | 3.3 (381)               |
| 50-59                            | 16,085  | 89,151           | 5.1 (451)               | 18,013  | 101,745          | 2.5 (257)               |
| 60-69                            | 11,001  | 59,373           | 3.7 (220)               | 12,398  | 67,817           | 1.6 (108)               |
| 70-79                            | 7,194   | 37,259           | 3.4 (125)               | 8,599   | 44,899           | 1.6 (70)                |
| ≥ 80                             | 3,882   | 19,697           | 3.1 (61)                | 6,325   | 35,542           | 1.2 (41)                |

**Supplementary table C.** Incidence of twenty chronic conditions considered individually  
(continued 2)

| Condition<br>age (years)                     | Men     |                  |                         | Women   |                  |                         |
|----------------------------------------------|---------|------------------|-------------------------|---------|------------------|-------------------------|
|                                              | Persons | Person-<br>years | Incidence<br>rate * (n) | Persons | Person-<br>years | Incidence<br>rate * (n) |
| <b>Chronic obstructive pulmonary disease</b> |         |                  |                         |         |                  |                         |
| 0-19                                         | 18,973  | 142,682          | 1.9 (267)               | 18,140  | 136,992          | 1.9 (263)               |
| 20-39                                        | 28,674  | 164,415          | 2.3 (376)               | 30,052  | 181,106          | 4.5 (811)               |
| 40-49                                        | 18,348  | 103,031          | 4.2 (430)               | 19,432  | 111,533          | 6.3 (704)               |
| 50-59                                        | 16,170  | 88,965           | 6.7 (600)               | 17,425  | 96,719           | 7.8 (756)               |
| 60-69                                        | 10,615  | 55,796           | 11.6 (648)              | 11,556  | 61,640           | 10.9 (670)              |
| 70-79                                        | 6,439   | 32,418           | 17.2 (559)              | 7,661   | 38,688           | 15.7 (608)              |
| ≥ 80                                         | 3,234   | 15,771           | 28.5 (449)              | 5,397   | 29,472           | 19.3 (568)              |
| <b>Osteoporosis</b>                          |         |                  |                         |         |                  |                         |
| 0-19                                         | 19,048  | 144,579          | <0.1 (5)                | 18,226  | 138,759          | <0.1 (5)                |
| 20-39                                        | 28,982  | 167,571          | 0.2 (41)                | 30,631  | 188,380          | 0.3 (58)                |
| 40-49                                        | 18,740  | 106,337          | 0.5 (53)                | 20,191  | 117,986          | 1.0 (119)               |
| 50-59                                        | 16,745  | 93,377           | 1.1 (99)                | 18,194  | 101,448          | 6.2 (628)               |
| 60-69                                        | 11,326  | 60,849           | 2.4 (144)               | 11,750  | 61,299           | 16.1 (987)              |
| 70-79                                        | 7,280   | 37,236           | 5.5 (206)               | 7,330   | 34,844           | 29.7 (1,034)            |
| ≥ 80                                         | 3,825   | 18,929           | 10.5 (198)              | 4,818   | 23,172           | 47.8 (1,107)            |
| <b>Chronic kidney disease</b>                |         |                  |                         |         |                  |                         |
| 0-19                                         | 19,007  | 143,995          | 0.3 (37)                | 18,200  | 138,410          | 0.2 (33)                |
| 20-39                                        | 28,896  | 166,662          | 0.8 (138)               | 30,555  | 187,402          | 0.9 (173)               |
| 40-49                                        | 18,626  | 105,218          | 1.9 (200)               | 20,119  | 117,418          | 1.4 (170)               |
| 50-59                                        | 16,546  | 91,726           | 4.2 (386)               | 18,264  | 102,861          | 3.1 (317)               |
| 60-69                                        | 11,049  | 58,474           | 10.1 (589)              | 12,300  | 66,388           | 6.8 (452)               |
| 70-79                                        | 6,896   | 34,352           | 22.4 (768)              | 8,330   | 42,336           | 15.0 (634)              |
| ≥ 80                                         | 3,462   | 16,119           | 52.2 (842)              | 5,916   | 31,586           | 31.6 (999)              |
| <b>Stroke</b>                                |         |                  |                         |         |                  |                         |
| 0-19                                         | 19,044  | 144,494          | 0.1 (11)                | 18,225  | 138,714          | 0.1 (10)                |
| 20-39                                        | 28,966  | 167,513          | 0.2 (32)                | 30,625  | 188,279          | 0.3 (54)                |
| 40-49                                        | 18,723  | 106,112          | 0.9 (98)                | 20,195  | 118,033          | 0.9 (101)               |
| 50-59                                        | 16,663  | 92,757           | 2.3 (215)               | 18,316  | 103,296          | 1.9 (200)               |
| 60-69                                        | 11,095  | 58,984           | 7.1 (420)               | 12,326  | 66,626           | 5.3 (352)               |
| 70-79                                        | 6,787   | 33,726           | 18.1 (609)              | 8,155   | 41,474           | 12.9 (536)              |
| ≥ 80                                         | 3,302   | 16,079           | 26.9 (432)              | 5,578   | 29,934           | 24.5 (734)              |
| <b>Congestive heart failure</b>              |         |                  |                         |         |                  |                         |
| 0-19                                         | 19,049  | 144,577          | <0.1 (3)                | 18,225  | 138,741          | <0.1 (1)                |
| 20-39                                        | 28,991  | 167,636          | 0.1 (23)                | 30,643  | 188,550          | 0.1 (27)                |
| 40-49                                        | 18,748  | 106,429          | 0.6 (60)                | 20,247  | 118,489          | 0.4 (44)                |
| 50-59                                        | 16,715  | 93,129           | 2.0 (189)               | 18,420  | 104,263          | 1.1 (113)               |
| 60-69                                        | 11,200  | 60,021           | 4.7 (284)               | 12,468  | 67,862           | 3.4 (228)               |
| 70-79                                        | 7,023   | 35,739           | 14.7 (524)              | 8,373   | 43,018           | 10.7 (462)              |
| ≥ 80                                         | 3,454   | 16,474           | 44.4 (732)              | 5,644   | 30,042           | 39.2 (1,178)            |

Supplementary table C. Incidence of twenty chronic conditions considered individually (continued 3)

| Condition<br>age (years)            | Men     |                  |                         | Women   |                  |                         |
|-------------------------------------|---------|------------------|-------------------------|---------|------------------|-------------------------|
|                                     | Persons | Person-<br>years | Incidence<br>rate * (n) | Persons | Person-<br>years | Incidence<br>rate * (n) |
| <b>Dementia</b>                     |         |                  |                         |         |                  |                         |
| 0-19                                | 19,045  | 144,233          | 0.7 (95)                | 18,224  | 138,612          | 0.5 (65)                |
| 20-39                               | 28,927  | 167,098          | 0.5 (90)                | 30,613  | 188,229          | 0.4 (74)                |
| 40-49                               | 18,730  | 106,234          | 0.8 (87)                | 20,234  | 118,263          | 0.7 (80)                |
| 50-59                               | 16,732  | 93,398           | 1.2 (113)               | 18,391  | 104,060          | 1.2 (122)               |
| 60-69                               | 11,339  | 61,016           | 2.4 (147)               | 12,527  | 68,389           | 2.2 (152)               |
| 70-79                               | 7,250   | 37,024           | 11.5 (424)              | 8,523   | 44,015           | 9.0 (394)               |
| ≥ 80                                | 3,651   | 17,816           | 37.4 (666)              | 5,684   | 30,237           | 43.8 (1,324)            |
| <b>Schizophrenia</b>                |         |                  |                         |         |                  |                         |
| 0-19                                | 19,043  | 144,539          | 0.2 (32)                | 18,221  | 138,684          | 0.2 (28)                |
| 20-39                               | 28,905  | 166,386          | 1.1 (177)               | 30,559  | 187,680          | 0.6 (116)               |
| 40-49                               | 18,656  | 105,803          | 0.6 (68)                | 20,132  | 117,772          | 0.5 (53)                |
| 50-59                               | 16,695  | 93,305           | 0.5 (49)                | 18,333  | 103,725          | 0.6 (67)                |
| 60-69                               | 11,357  | 61,286           | 1.0 (59)                | 12,474  | 68,212           | 0.9 (61)                |
| 70-79                               | 7,338   | 38,011           | 2.4 (92)                | 8,586   | 44,755           | 2.7 (121)               |
| ≥ 80                                | 3,892   | 19,550           | 11.3 (221)              | 6,114   | 34,000           | 13.1 (444)              |
| <b>Hepatitis</b>                    |         |                  |                         |         |                  |                         |
| 0-19                                | 19,041  | 144,470          | 0.1 (17)                | 18,216  | 138,646          | 0.1 (20)                |
| 20-39                               | 28,927  | 166,978          | 0.7 (118)               | 30,557  | 187,564          | 0.6 (114)               |
| 40-49                               | 18,620  | 105,303          | 1.3 (136)               | 20,126  | 117,719          | 0.6 (76)                |
| 50-59                               | 16,599  | 92,627           | 1.1 (105)               | 18,340  | 103,834          | 0.6 (58)                |
| 60-69                               | 11,293  | 61,018           | 0.8 (48)                | 12,506  | 68,411           | 0.9 (62)                |
| 70-79                               | 7,353   | 38,053           | 0.6 (24)                | 8,634   | 45,080           | 0.6 (25)                |
| ≥ 80                                | 3,936   | 20,045           | 0.4 (9)                 | 6,350   | 35,622           | 0.3 (12)                |
| <b>Autism spectrum disorder</b>     |         |                  |                         |         |                  |                         |
| 0-19                                | 19,031  | 144,197          | 0.3 (37)                | 18,224  | 138,664          | 0.1 (16)                |
| 20-39                               | 28,972  | 167,636          | <0.1 (6)                | 30,643  | 188,651          | <0.1 (2)                |
| 40-49                               | 18,778  | 106,682          | <0.1 (3)                | 20,275  | 118,760          | 0.0 (0)                 |
| 50-59                               | 16,810  | 94,079           | 0.0 (0)                 | 18,480  | 104,783          | 0.0 (0)                 |
| 60-69                               | 11,424  | 61,702           | 0.0 (0)                 | 12,603  | 69,065           | 0.0 (0)                 |
| 70-79                               | 7,409   | 38,416           | 0.0 (0)                 | 8,704   | 45,493           | 0.0 (0)                 |
| ≥ 80                                | 3,966   | 20,174           | 0.0 (0)                 | 6,383   | 35,849           | 0.0 (0)                 |
| <b>Human immunodeficiency virus</b> |         |                  |                         |         |                  |                         |
| 0-19                                | 19,049  | 144,591          | <0.1 (1)                | 18,227  | 138,772          | <0.1 (1)                |
| 20-39                               | 28,985  | 167,674          | 0.1 (20)                | 30,646  | 188,628          | 0.1 (11)                |
| 40-49                               | 18,756  | 106,511          | 0.1 (13)                | 20,265  | 118,694          | <0.1 (2)                |
| 50-59                               | 16,794  | 94,006           | <0.1 (3)                | 18,476  | 104,777          | 0.0 (0)                 |
| 60-69                               | 11,420  | 61,680           | <0.1 (1)                | 12,603  | 69,065           | 0.0 (0)                 |
| 70-79                               | 7,408   | 38,407           | <0.1 (1)                | 8,704   | 45,489           | <0.1 (1)                |
| ≥ 80                                | 3,964   | 20,171           | 0.0 (0)                 | 6,383   | 35,849           | 0.0 (0)                 |

\* Incidence rates are reported per 1,000 person-years, and are calculated by dividing the number of observed new cases in parentheses by the number of observed person-years of risk within each age and sex stratum. The 20 chronic conditions are listed in decreasing order of frequency (by overall age- and sex-standardized prevalence). (Rocca et., al, 2013)

STROBE 2007 (v4) Statement—Checklist of items that should be included in reports of cohort studies

| Section/Topic             | Item # | Recommendation                                                                                                                                                                       | Reported on page # |
|---------------------------|--------|--------------------------------------------------------------------------------------------------------------------------------------------------------------------------------------|--------------------|
| Title and abstract        | 1      | (a) Indicate the study’s design with a commonly used term in the title or the abstract                                                                                               | 1,3                |
|                           |        | (b) Provide in the abstract an informative and balanced summary of what was done and what was found                                                                                  | 3-4                |
| <b>Introduction</b>       |        |                                                                                                                                                                                      |                    |
| Background/rationale      | 2      | Explain the scientific background and rationale for the investigation being reported                                                                                                 | 6-7                |
| Objectives                | 3      | State specific objectives, including any prespecified hypotheses                                                                                                                     | 7                  |
| <b>Methods</b>            |        |                                                                                                                                                                                      |                    |
| Study design              | 4      | Present key elements of study design early in the paper                                                                                                                              | 7-10               |
| Setting                   | 5      | Describe the setting, locations, and relevant dates, including periods of recruitment, exposure, follow-up, and data collection                                                      | 7-8                |
| Participants              | 6      | (a) Give the eligibility criteria, and the sources and methods of selection of participants. Describe methods of follow-up                                                           | 8                  |
|                           |        | (b) For matched studies, give matching criteria and number of exposed and unexposed                                                                                                  | Not applicable     |
| Variables                 | 7      | Clearly define all outcomes, exposures, predictors, potential confounders, and effect modifiers. Give diagnostic criteria, if applicable                                             | 8-9                |
| Data sources/ measurement | 8*     | For each variable of interest, give sources of data and details of methods of assessment (measurement). Describe comparability of assessment methods if there is more than one group | 8-9                |
| Bias                      | 9      | Describe any efforts to address potential sources of bias                                                                                                                            | 14-17              |
| Study size                | 10     | Explain how the study size was arrived at                                                                                                                                            | 10                 |
| Quantitative variables    | 11     | Explain how quantitative variables were handled in the analyses. If applicable, describe which groupings were chosen and why                                                         | 9                  |
| Statistical methods       | 12     | (a) Describe all statistical methods, including those used to control for confounding                                                                                                | 9-10               |
|                           |        | (b) Describe any methods used to examine subgroups and interactions                                                                                                                  | 9-10               |
|                           |        | (c) Explain how missing data were addressed                                                                                                                                          | 9                  |
|                           |        | (d) If applicable, explain how loss to follow-up was addressed                                                                                                                       | 8-9, 16            |
|                           |        | (e) Describe any sensitivity analyses                                                                                                                                                | 10                 |
| <b>Results</b>            |        |                                                                                                                                                                                      |                    |



|                          |     |                                                                                                                                                                                                              |                                    |
|--------------------------|-----|--------------------------------------------------------------------------------------------------------------------------------------------------------------------------------------------------------------|------------------------------------|
| Participants             | 13* | (a) Report numbers of individuals at each stage of study—eg numbers potentially eligible, examined for eligibility, confirmed eligible, included in the study, completing follow-up, and analysed            | 10                                 |
|                          |     | (b) Give reasons for non-participation at each stage                                                                                                                                                         | 10                                 |
|                          |     | (c) Consider use of a flow diagram                                                                                                                                                                           | Not applicable                     |
| Descriptive data         | 14* | (a) Give characteristics of study participants (eg demographic, clinical, social) and information on exposures and potential confounders                                                                     | 10, Tables 1 and 2                 |
|                          |     | (b) Indicate number of participants with missing data for each variable of interest                                                                                                                          | 9                                  |
|                          |     | (c) Summarise follow-up time (eg, average and total amount)                                                                                                                                                  | 10                                 |
| Outcome data             | 15* | Report numbers of outcome events or summary measures over time                                                                                                                                               | 10-13, Tables 1-3, Figures 1 and 2 |
| Main results             | 16  | (a) Give unadjusted estimates and, if applicable, confounder-adjusted estimates and their precision (eg, 95% confidence interval). Make clear which confounders were adjusted for and why they were included | Not applicable                     |
|                          |     | (b) Report category boundaries when continuous variables were categorized                                                                                                                                    | Tables 1-3, Figures 1 and 2        |
|                          |     | (c) If relevant, consider translating estimates of relative risk into absolute risk for a meaningful time period                                                                                             | Not applicable                     |
| Other analyses           | 17  | Report other analyses done—eg analyses of subgroups and interactions, and sensitivity analyses                                                                                                               | 10-13                              |
| <b>Discussion</b>        |     |                                                                                                                                                                                                              |                                    |
| Key results              | 18  | Summarise key results with reference to study objectives                                                                                                                                                     | 13-14                              |
| <b>Limitations</b>       |     |                                                                                                                                                                                                              |                                    |
| Interpretation           | 20  | Give a cautious overall interpretation of results considering objectives, limitations, multiplicity of analyses, results from similar studies, and other relevant evidence                                   | 14-21                              |
| Generalisability         | 21  | Discuss the generalisability (external validity) of the study results                                                                                                                                        | 17                                 |
| <b>Other information</b> |     |                                                                                                                                                                                                              |                                    |
| Funding                  | 22  | Give the source of funding and the role of the funders for the present study and, if applicable, for the original study on which the present article is based                                                | 23                                 |

\*Give information separately for cases and controls in case-control studies and, if applicable, for exposed and unexposed groups in cohort and cross-sectional studies.

**Note:** An Explanation and Elaboration article discusses each checklist item and gives methodological background and published examples of transparent reporting. The STROBE checklist is best used in conjunction with this article (freely available on the Web sites of PLoS Medicine at <http://www.plosmedicine.org/>, Annals of Internal Medicine at <http://www.annals.org/>, and Epidemiology at <http://www.epidem.com/>). Information on the STROBE Initiative is available at [www.strobe-statement.org](http://www.strobe-statement.org).
